# Supplementary material
Source: publisher figshare collection journal article supplement (https://acs.figshare.com/ndownloader/files/9776038)
Supplement: Supplementary file 1 [file 9776038]

data_mx5831
_audit_creation_date              2017-04-21
_audit_creation_method
;
Olex2 1.2
(compiled 2017.03.28 svn.r3405 for OlexSys, GUI svn.r5335)
;
_shelx_SHELXL_version_number      '2016/6'
_publ_contact_author_address      ?
_publ_contact_author_email        ?
_publ_contact_author_id_orcid     ?
_publ_contact_author_name         ''
_publ_contact_author_phone        ?
_publ_section_references
;
Dolomanov, O.V., Bourhis, L.J., Gildea, R.J, Howard, J.A.K. & Puschmann, H.
 (2009), J. Appl. Cryst. 42, 339-341.

Sheldrick, G.M. (2015). Acta Cryst. A71, 3-8.

Sheldrick, G.M. (2015). Acta Cryst. C71, 3-8.
;
_chemical_name_common             ?
_chemical_name_systematic         ?
_chemical_formula_moiety          'C18 H17 N O4 S'
_chemical_formula_sum             'C18 H17 N O4 S'
_chemical_formula_weight          343.38
_chemical_absolute_configuration  ?
_chemical_melting_point           ?
loop_
  _atom_type_symbol
  _atom_type_description
  _atom_type_scat_dispersion_real
  _atom_type_scat_dispersion_imag
  _atom_type_scat_source
 'C' 'C' 0.0033 0.0016 'International Tables Vol C Tables 4.2.6.8 and 6.1.1.4'
 'H' 'H' 0.0000 0.0000 'International Tables Vol C Tables 4.2.6.8 and 6.1.1.4'
 'N' 'N' 0.0061 0.0033 'International Tables Vol C Tables 4.2.6.8 and 6.1.1.4'
 'O' 'O' 0.0106 0.0060 'International Tables Vol C Tables 4.2.6.8 and 6.1.1.4'
 'S' 'S' 0.1246 0.1234 'International Tables Vol C Tables 4.2.6.8 and 6.1.1.4'

_shelx_space_group_comment
;
The symmetry employed for this shelxl refinement is uniquely defined
by the following loop, which should always be used as a source of
symmetry information in preference to the above space-group names.
They are only intended as comments.
;
_space_group_crystal_system       'monoclinic'
_space_group_IT_number            9
_space_group_name_H-M_alt         'C 1 c 1'
_space_group_name_Hall            'C -2yc'
loop_
  _space_group_symop_operation_xyz
 'x, y, z'
 'x, -y, z+1/2'
 'x+1/2, y+1/2, z'
 'x+1/2, -y+1/2, z+1/2'

_cell_length_a                    13.726(3)
_cell_length_b                    15.964(3)
_cell_length_c                    7.7194(15)
_cell_angle_alpha                 90
_cell_angle_beta                  111.03(3)
_cell_angle_gamma                 90
_cell_volume                      1578.8(6)
_cell_formula_units_Z             4
_cell_measurement_reflns_used     2752
_cell_measurement_temperature     173(2)
_cell_measurement_theta_max       27.4810
_cell_measurement_theta_min       2.0383
_shelx_estimated_absorpt_T_max    ?
_shelx_estimated_absorpt_T_min    ?
_exptl_absorpt_coefficient_mu     0.228
_exptl_absorpt_correction_T_max   1.000
_exptl_absorpt_correction_T_min   0.72061
_exptl_absorpt_correction_type    'multi-scan'
_exptl_absorpt_process_details    'CrystalClear (Rigaku Inc., 2007)'
_exptl_absorpt_special_details    ?
_exptl_crystal_colour             'Colorless'
_exptl_crystal_density_diffrn     1.445
_exptl_crystal_density_meas       ?
_exptl_crystal_density_method     ?
_exptl_crystal_description        'block'
_exptl_crystal_F_000              720
_exptl_crystal_size_max           0.428
_exptl_crystal_size_mid           0.256
_exptl_crystal_size_min           0.183
_exptl_transmission_factor_max    ?
_exptl_transmission_factor_min    ?
_diffrn_reflns_av_R_equivalents   0.0468
_diffrn_reflns_av_unetI/netI      0.0425
_diffrn_reflns_Laue_measured_fraction_full 0.995
_diffrn_reflns_Laue_measured_fraction_max 0.995
_diffrn_reflns_limit_h_max        17
_diffrn_reflns_limit_h_min        -17
_diffrn_reflns_limit_k_max        19
_diffrn_reflns_limit_k_min        -20
_diffrn_reflns_limit_l_max        10
_diffrn_reflns_limit_l_min        -9
_diffrn_reflns_number             9017
_diffrn_reflns_point_group_measured_fraction_full 0.985
_diffrn_reflns_point_group_measured_fraction_max 0.978
_diffrn_reflns_theta_full         25.242
_diffrn_reflns_theta_max          27.471
_diffrn_reflns_theta_min          2.038
_diffrn_ambient_temperature       173(2)
_diffrn_detector_area_resol_mean  ?
_diffrn_measured_fraction_theta_full 0.995
_diffrn_measured_fraction_theta_max 0.995
_diffrn_measurement_device_type   'MM007-HF CCD(Saturn 724+)' 
_diffrn_measurement_method        '\w scans at fixed \c = 45\%'    
_diffrn_radiation_monochromator   Confocal 
_diffrn_radiation_type            MoK\a
_diffrn_radiation_wavelength      0.71073
_diffrn_source                    Confocal 
_reflns_Friedel_coverage          0.961
_reflns_Friedel_fraction_full     0.975
_reflns_Friedel_fraction_max      0.962
_reflns_number_gt                 3448
_reflns_number_total              3518
_reflns_special_details
;
 Reflections were merged by SHELXL according to the crystal
 class for the calculation of statistics and refinement.
 
 _reflns_Friedel_fraction is defined as the number of unique
 Friedel pairs measured divided by the number that would be
 possible theoretically, ignoring centric projections and
 systematic absences.
;
_reflns_threshold_expression      'I > 2\s(I)'
_computing_cell_refinement        'CrystalClear (Rigaku Inc., 2007)'
_computing_data_collection        'CrystalClear (Rigaku Inc., 2007)'
_computing_data_reduction         'CrystalClear (Rigaku Inc., 2007)'
_computing_molecular_graphics     'Olex2 (Dolomanov et al., 2009)'
_computing_publication_material   'CIFTAB (Sheldrick, 2013)'
_computing_structure_refinement   'ShelXL (Sheldrick, 2015)'
_computing_structure_solution     'ShelXT (Sheldrick, 2015)'
_refine_diff_density_max          0.193
_refine_diff_density_min          -0.305
_refine_diff_density_rms          0.045
_refine_ls_abs_structure_details
;
 Flack x determined using 1561 quotients [(I+)-(I-)]/[(I+)+(I-)]
 (Parsons, Flack and Wagner, Acta Cryst. B69 (2013) 249-259).
;
_refine_ls_abs_structure_Flack    0.01(4)
_refine_ls_extinction_coef        .
_refine_ls_extinction_method      none
_refine_ls_goodness_of_fit_ref    1.041
_refine_ls_hydrogen_treatment     constr
_refine_ls_matrix_type            full
_refine_ls_number_parameters      218
_refine_ls_number_reflns          3518
_refine_ls_number_restraints      2
_refine_ls_R_factor_all           0.0367
_refine_ls_R_factor_gt            0.0360
_refine_ls_restrained_S_all       1.041
_refine_ls_shift/su_max           0.000
_refine_ls_shift/su_mean          0.000
_refine_ls_structure_factor_coef  Fsqd
_refine_ls_weighting_details
'w=1/[\s^2^(Fo^2^)+(0.0438P)^2^+0.6618P] where P=(Fo^2^+2Fc^2^)/3'
_refine_ls_weighting_scheme       calc
_refine_ls_wR_factor_gt           0.0872
_refine_ls_wR_factor_ref          0.0878
_refine_special_details           ?
_olex2_refinement_description
;
1. Fixed Uiso
 At 1.2 times of:
  All C(H) groups, All C(H,H) groups
 At 1.5 times of:
  All C(H,H,H) groups
2.a Ternary CH refined with riding coordinates:
 C8(H8)
2.b Secondary CH2 refined with riding coordinates:
 C9(H9A,H9B), C12(H12A,H12B)
2.c Aromatic/amide H refined with riding coordinates:
 C2(H2), C3(H3), C5(H5), C11(H11), C14(H14), C15(H15), C16(H16), C17(H17),
 C18(H18)
2.d Idealised Me refined as rotating group:
 C7(H7A,H7B,H7C)
;
_atom_sites_solution_hydrogens    geom
_atom_sites_solution_primary      dual
_atom_sites_solution_secondary    ?
loop_
  _atom_site_label
  _atom_site_type_symbol
  _atom_site_fract_x
  _atom_site_fract_y
  _atom_site_fract_z
  _atom_site_U_iso_or_equiv
  _atom_site_adp_type
  _atom_site_occupancy
  _atom_site_site_symmetry_order
  _atom_site_calc_flag
  _atom_site_refinement_flags_posn
  _atom_site_refinement_flags_adp
  _atom_site_refinement_flags_occupancy
  _atom_site_disorder_assembly
  _atom_site_disorder_group
 S1 S 0.59119(5) 0.26287(4) 0.96748(8) 0.02598(16) Uani 1 1 d . . . . .
 O1 O 0.71075(15) 0.28440(13) 1.0062(3) 0.0296(4) Uani 1 1 d . . . . .
 O2 O 0.56419(17) 0.29584(15) 1.1155(3) 0.0339(5) Uani 1 1 d . . . . .
 O3 O 0.58189(17) 0.17600(13) 0.9266(3) 0.0338(5) Uani 1 1 d . . . . .
 O4 O 0.50642(14) 0.45463(12) 0.6626(2) 0.0268(4) Uani 1 1 d . . . . .
 N1 N 0.53059(17) 0.31797(14) 0.7829(3) 0.0231(5) Uani 1 1 d . . . . .
 C1 C 0.7338(2) 0.37105(18) 1.0122(4) 0.0271(6) Uani 1 1 d . . . . .
 C2 C 0.8376(2) 0.3923(2) 1.1081(4) 0.0345(7) Uani 1 1 d . . . . .
 H2 H 0.886946 0.351118 1.162755 0.041 Uiso 1 1 calc R . . . .
 C3 C 0.8658(2) 0.4755(2) 1.1206(4) 0.0378(7) Uani 1 1 d . . . . .
 H3 H 0.934805 0.490159 1.186592 0.045 Uiso 1 1 calc R . . . .
 C4 C 0.7937(2) 0.5382(2) 1.0370(4) 0.0338(7) Uani 1 1 d . . . . .
 C5 C 0.6911(2) 0.51516(19) 0.9381(4) 0.0292(6) Uani 1 1 d . . . . .
 H5 H 0.642580 0.556344 0.879331 0.035 Uiso 1 1 calc R . . . .
 C6 C 0.6591(2) 0.43156(18) 0.9249(4) 0.0257(6) Uani 1 1 d . . . . .
 C7 C 0.8244(3) 0.6295(2) 1.0573(5) 0.0434(8) Uani 1 1 d . . . . .
 H7A H 0.832618 0.648311 1.179909 0.065 Uiso 1 1 calc GR . . . .
 H7B H 0.771082 0.661986 0.967403 0.065 Uiso 1 1 calc GR . . . .
 H7C H 0.889177 0.636388 1.037606 0.065 Uiso 1 1 calc GR . . . .
 C8 C 0.5451(2) 0.40952(16) 0.8282(4) 0.0239(5) Uani 1 1 d . . . . .
 H8 H 0.506154 0.424825 0.907929 0.029 Uiso 1 1 calc R . . . .
 C9 C 0.3996(2) 0.43595(17) 0.5524(4) 0.0267(6) Uani 1 1 d . . . . .
 H9A H 0.364924 0.486574 0.491418 0.032 Uiso 1 1 calc R . . . .
 H9B H 0.363858 0.416003 0.632382 0.032 Uiso 1 1 calc R . . . .
 C10 C 0.3934(2) 0.37003(17) 0.4079(4) 0.0230(5) Uani 1 1 d . . . . .
 C11 C 0.4638(2) 0.30906(17) 0.4397(4) 0.0255(5) Uani 1 1 d . . . . .
 H11 H 0.455697 0.271763 0.342931 0.031 Uiso 1 1 calc R . . . .
 C12 C 0.5551(2) 0.29451(18) 0.6165(4) 0.0253(5) Uani 1 1 d . . . . .
 H12A H 0.574705 0.235847 0.624678 0.030 Uiso 1 1 calc R . . . .
 H12B H 0.614167 0.327256 0.614125 0.030 Uiso 1 1 calc R . . . .
 C13 C 0.3064(2) 0.37819(15) 0.2257(4) 0.0229(5) Uani 1 1 d . . . . .
 C14 C 0.2127(2) 0.41708(17) 0.2119(4) 0.0275(6) Uani 1 1 d . . . . .
 H14 H 0.204256 0.438143 0.317940 0.033 Uiso 1 1 calc R . . . .
 C15 C 0.1318(2) 0.42458(19) 0.0404(4) 0.0330(6) Uani 1 1 d . . . . .
 H15 H 0.069889 0.450754 0.032917 0.040 Uiso 1 1 calc R . . . .
 C16 C 0.1429(2) 0.39338(19) -0.1188(4) 0.0323(6) Uani 1 1 d . . . . .
 H16 H 0.088540 0.397880 -0.232771 0.039 Uiso 1 1 calc R . . . .
 C17 C 0.2358(2) 0.35542(19) -0.1067(4) 0.0303(6) Uani 1 1 d . . . . .
 H17 H 0.244055 0.334854 -0.213314 0.036 Uiso 1 1 calc R . . . .
 C18 C 0.3165(2) 0.34784(18) 0.0631(4) 0.0269(6) Uani 1 1 d . . . . .
 H18 H 0.378392 0.322135 0.069079 0.032 Uiso 1 1 calc R . . . .

loop_
  _atom_site_aniso_label
  _atom_site_aniso_U_11
  _atom_site_aniso_U_22
  _atom_site_aniso_U_33
  _atom_site_aniso_U_23
  _atom_site_aniso_U_13
  _atom_site_aniso_U_12
 S1 0.0241(3) 0.0287(3) 0.0242(3) 0.0051(3) 0.0075(2) 0.0028(3)
 O1 0.0233(10) 0.0303(10) 0.0327(10) 0.0033(8) 0.0071(8) 0.0029(8)
 O2 0.0333(11) 0.0436(13) 0.0266(10) 0.0063(9) 0.0129(9) 0.0063(9)
 O3 0.0352(11) 0.0276(10) 0.0353(11) 0.0079(8) 0.0086(9) 0.0022(9)
 O4 0.0268(9) 0.0230(9) 0.0240(9) 0.0015(7) 0.0009(7) -0.0016(7)
 N1 0.0243(10) 0.0215(10) 0.0213(11) 0.0018(8) 0.0053(9) 0.0025(9)
 C1 0.0240(13) 0.0320(14) 0.0252(13) 0.0002(11) 0.0088(10) 0.0000(11)
 C2 0.0246(14) 0.0461(18) 0.0300(14) 0.0008(13) 0.0067(12) 0.0012(12)
 C3 0.0280(14) 0.052(2) 0.0323(16) -0.0096(14) 0.0097(12) -0.0120(14)
 C4 0.0347(15) 0.0406(17) 0.0275(14) -0.0073(12) 0.0127(12) -0.0088(13)
 C5 0.0325(14) 0.0288(14) 0.0257(14) -0.0055(11) 0.0098(12) -0.0040(11)
 C6 0.0230(12) 0.0304(15) 0.0220(12) -0.0030(10) 0.0062(10) -0.0015(10)
 C7 0.0453(19) 0.0420(19) 0.0447(19) -0.0130(15) 0.0185(16) -0.0182(15)
 C8 0.0242(12) 0.0216(12) 0.0231(12) -0.0014(10) 0.0051(10) -0.0001(10)
 C9 0.0265(13) 0.0240(13) 0.0251(13) -0.0022(10) 0.0039(11) 0.0041(11)
 C10 0.0253(12) 0.0222(12) 0.0213(12) 0.0013(10) 0.0078(10) -0.0009(10)
 C11 0.0315(14) 0.0223(13) 0.0219(12) -0.0004(10) 0.0087(11) 0.0012(10)
 C12 0.0265(12) 0.0255(13) 0.0232(12) 0.0007(10) 0.0081(10) 0.0042(10)
 C13 0.0236(12) 0.0198(12) 0.0226(12) 0.0009(9) 0.0049(10) -0.0029(10)
 C14 0.0274(13) 0.0267(13) 0.0281(13) 0.0006(10) 0.0098(11) 0.0017(11)
 C15 0.0257(13) 0.0321(15) 0.0365(15) 0.0007(12) 0.0052(12) 0.0045(11)
 C16 0.0281(14) 0.0322(15) 0.0292(14) 0.0024(12) 0.0013(11) -0.0023(11)
 C17 0.0338(14) 0.0289(14) 0.0249(13) -0.0033(11) 0.0066(11) -0.0024(11)
 C18 0.0247(13) 0.0262(13) 0.0281(13) -0.0015(10) 0.0073(11) -0.0001(10)

_geom_special_details
;
 All esds (except the esd in the dihedral angle between two l.s. planes)
 are estimated using the full covariance matrix.  The cell esds are taken
 into account individually in the estimation of esds in distances, angles
 and torsion angles; correlations between esds in cell parameters are only
 used when they are defined by crystal symmetry.  An approximate (isotropic)
 treatment of cell esds is used for estimating esds involving l.s. planes.
;
loop_
  _geom_bond_atom_site_label_1
  _geom_bond_atom_site_label_2
  _geom_bond_distance
  _geom_bond_site_symmetry_2
  _geom_bond_publ_flag
 S1 O1 1.596(2) . ?
 S1 O2 1.423(2) . ?
 S1 O3 1.418(2) . ?
 S1 N1 1.626(2) . ?
 O1 C1 1.416(4) . ?
 O4 C8 1.396(3) . ?
 O4 C9 1.437(3) . ?
 N1 C8 1.499(3) . ?
 N1 C12 1.488(4) . ?
 C1 C2 1.391(4) . ?
 C1 C6 1.394(4) . ?
 C2 H2 0.9300 . ?
 C2 C3 1.377(5) . ?
 C3 H3 0.9300 . ?
 C3 C4 1.393(5) . ?
 C4 C5 1.389(4) . ?
 C4 C7 1.510(5) . ?
 C5 H5 0.9300 . ?
 C5 C6 1.397(4) . ?
 C6 C8 1.513(4) . ?
 C7 H7A 0.9600 . ?
 C7 H7B 0.9600 . ?
 C7 H7C 0.9600 . ?
 C8 H8 0.9800 . ?
 C9 H9A 0.9700 . ?
 C9 H9B 0.9700 . ?
 C9 C10 1.514(4) . ?
 C10 C11 1.331(4) . ?
 C10 C13 1.488(4) . ?
 C11 H11 0.9300 . ?
 C11 C12 1.503(4) . ?
 C12 H12A 0.9700 . ?
 C12 H12B 0.9700 . ?
 C13 C14 1.397(4) . ?
 C13 C18 1.398(4) . ?
 C14 H14 0.9300 . ?
 C14 C15 1.395(4) . ?
 C15 H15 0.9300 . ?
 C15 C16 1.384(5) . ?
 C16 H16 0.9300 . ?
 C16 C17 1.384(4) . ?
 C17 H17 0.9300 . ?
 C17 C18 1.385(4) . ?
 C18 H18 0.9300 . ?

loop_
  _geom_angle_atom_site_label_1
  _geom_angle_atom_site_label_2
  _geom_angle_atom_site_label_3
  _geom_angle
  _geom_angle_site_symmetry_1
  _geom_angle_site_symmetry_3
  _geom_angle_publ_flag
 O1 S1 N1 102.46(12) . . ?
 O2 S1 O1 108.46(13) . . ?
 O2 S1 N1 107.75(12) . . ?
 O3 S1 O1 104.87(13) . . ?
 O3 S1 O2 120.80(14) . . ?
 O3 S1 N1 110.92(12) . . ?
 C1 O1 S1 114.79(17) . . ?
 C8 O4 C9 114.0(2) . . ?
 C8 N1 S1 109.84(17) . . ?
 C12 N1 S1 114.66(17) . . ?
 C12 N1 C8 113.2(2) . . ?
 C2 C1 O1 115.5(2) . . ?
 C2 C1 C6 121.6(3) . . ?
 C6 C1 O1 122.9(2) . . ?
 C1 C2 H2 120.6 . . ?
 C3 C2 C1 118.8(3) . . ?
 C3 C2 H2 120.6 . . ?
 C2 C3 H3 119.2 . . ?
 C2 C3 C4 121.7(3) . . ?
 C4 C3 H3 119.2 . . ?
 C3 C4 C7 121.3(3) . . ?
 C5 C4 C3 118.4(3) . . ?
 C5 C4 C7 120.2(3) . . ?
 C4 C5 H5 119.2 . . ?
 C4 C5 C6 121.6(3) . . ?
 C6 C5 H5 119.2 . . ?
 C1 C6 C5 117.9(2) . . ?
 C1 C6 C8 121.9(2) . . ?
 C5 C6 C8 120.0(2) . . ?
 C4 C7 H7A 109.5 . . ?
 C4 C7 H7B 109.5 . . ?
 C4 C7 H7C 109.5 . . ?
 H7A C7 H7B 109.5 . . ?
 H7A C7 H7C 109.5 . . ?
 H7B C7 H7C 109.5 . . ?
 O4 C8 N1 108.3(2) . . ?
 O4 C8 C6 108.5(2) . . ?
 O4 C8 H8 109.4 . . ?
 N1 C8 C6 111.6(2) . . ?
 N1 C8 H8 109.4 . . ?
 C6 C8 H8 109.4 . . ?
 O4 C9 H9A 109.5 . . ?
 O4 C9 H9B 109.5 . . ?
 O4 C9 C10 110.9(2) . . ?
 H9A C9 H9B 108.1 . . ?
 C10 C9 H9A 109.5 . . ?
 C10 C9 H9B 109.5 . . ?
 C11 C10 C9 121.8(2) . . ?
 C11 C10 C13 121.4(2) . . ?
 C13 C10 C9 116.7(2) . . ?
 C10 C11 H11 116.8 . . ?
 C10 C11 C12 126.5(3) . . ?
 C12 C11 H11 116.8 . . ?
 N1 C12 C11 111.8(2) . . ?
 N1 C12 H12A 109.3 . . ?
 N1 C12 H12B 109.3 . . ?
 C11 C12 H12A 109.3 . . ?
 C11 C12 H12B 109.3 . . ?
 H12A C12 H12B 107.9 . . ?
 C14 C13 C10 121.0(3) . . ?
 C14 C13 C18 118.0(2) . . ?
 C18 C13 C10 120.9(2) . . ?
 C13 C14 H14 119.7 . . ?
 C15 C14 C13 120.6(3) . . ?
 C15 C14 H14 119.7 . . ?
 C14 C15 H15 119.7 . . ?
 C16 C15 C14 120.5(3) . . ?
 C16 C15 H15 119.7 . . ?
 C15 C16 H16 120.3 . . ?
 C17 C16 C15 119.3(3) . . ?
 C17 C16 H16 120.3 . . ?
 C16 C17 H17 119.8 . . ?
 C16 C17 C18 120.4(3) . . ?
 C18 C17 H17 119.8 . . ?
 C13 C18 H18 119.4 . . ?
 C17 C18 C13 121.1(3) . . ?
 C17 C18 H18 119.4 . . ?

_shelx_res_file
;
TITL mx5831_a.res in Cc
    mx5831.res
    created by SHELXL-2016/6 at 09:05:20 on 21-Apr-2017
REM Old TITL mx5831 in Cc
REM SHELXT solution in Cc
REM R1 0.076, Rweak 0.317, Alpha 0.003, Orientation as input
REM Flack x = 0.056 ( 0.032 ) from Parsons' quotients
REM Formula found by SHELXT: C18 N O4 S
CELL 0.71073 13.7255 15.9641 7.7194 90 111.03 90
ZERR 4 0.0027 0.0032 0.0015 0 0.03 0
LATT -7
SYMM +X,-Y,0.5+Z
SFAC C H N O S
UNIT 72 68 4 16 4

L.S. 10
PLAN  20
BOND $H
list 4
fmap 2
ACTA
REM <olex2.extras>
REM <HklSrc "%.\\mx5831.hkl">
REM </olex2.extras>

WGHT    0.043800    0.661800
FVAR       0.72982
S1    5    0.591191    0.262873    0.967480    11.00000    0.02409    0.02870 =
         0.02420    0.00507    0.00753    0.00277
O1    4    0.710748    0.284399    1.006181    11.00000    0.02332    0.03031 =
         0.03268    0.00334    0.00707    0.00293
O2    4    0.564186    0.295839    1.115498    11.00000    0.03326    0.04361 =
         0.02659    0.00627    0.01289    0.00630
O3    4    0.581890    0.176001    0.926601    11.00000    0.03524    0.02757 =
         0.03533    0.00791    0.00855    0.00222
O4    4    0.506423    0.454635    0.662600    11.00000    0.02676    0.02298 =
         0.02399    0.00150    0.00091   -0.00164
N1    3    0.530589    0.317970    0.782888    11.00000    0.02429    0.02146 =
         0.02127    0.00179    0.00527    0.00246
C1    1    0.733837    0.371054    1.012211    11.00000    0.02403    0.03198 =
         0.02524    0.00016    0.00878    0.00000
C2    1    0.837560    0.392321    1.108086    11.00000    0.02465    0.04610 =
         0.03002    0.00083    0.00666    0.00119
AFIX  43
H2    2    0.886946    0.351118    1.162755    11.00000   -1.20000
AFIX   0
C3    1    0.865812    0.475484    1.120605    11.00000    0.02802    0.05224 =
         0.03228   -0.00958    0.00969   -0.01200
AFIX  43
H3    2    0.934805    0.490159    1.186592    11.00000   -1.20000
AFIX   0
C4    1    0.793695    0.538225    1.036956    11.00000    0.03466    0.04061 =
         0.02752   -0.00732    0.01267   -0.00880
C5    1    0.691111    0.515161    0.938107    11.00000    0.03249    0.02876 =
         0.02574   -0.00550    0.00979   -0.00397
AFIX  43
H5    2    0.642580    0.556344    0.879331    11.00000   -1.20000
AFIX   0
C6    1    0.659077    0.431558    0.924855    11.00000    0.02303    0.03042 =
         0.02205   -0.00299    0.00622   -0.00150
C7    1    0.824444    0.629544    1.057323    11.00000    0.04532    0.04201 =
         0.04466   -0.01296    0.01846   -0.01824
AFIX 137
H7A   2    0.832618    0.648311    1.179909    11.00000   -1.50000
H7B   2    0.771082    0.661986    0.967403    11.00000   -1.50000
H7C   2    0.889177    0.636388    1.037606    11.00000   -1.50000
AFIX   0
C8    1    0.545100    0.409523    0.828194    11.00000    0.02420    0.02162 =
         0.02306   -0.00143    0.00515   -0.00011
AFIX  13
H8    2    0.506154    0.424825    0.907929    11.00000   -1.20000
AFIX   0
C9    1    0.399635    0.435950    0.552436    11.00000    0.02648    0.02400 =
         0.02512   -0.00216    0.00393    0.00410
AFIX  23
H9A   2    0.364924    0.486574    0.491418    11.00000   -1.20000
H9B   2    0.363858    0.416003    0.632382    11.00000   -1.20000
AFIX   0
C10   1    0.393416    0.370025    0.407863    11.00000    0.02526    0.02218 =
         0.02126    0.00133    0.00785   -0.00093
C11   1    0.463801    0.309062    0.439663    11.00000    0.03152    0.02234 =
         0.02188   -0.00039    0.00866    0.00122
AFIX  43
H11   2    0.455697    0.271763    0.342931    11.00000   -1.20000
AFIX   0
C12   1    0.555125    0.294505    0.616463    11.00000    0.02652    0.02550 =
         0.02324    0.00071    0.00806    0.00424
AFIX  23
H12A  2    0.574705    0.235847    0.624678    11.00000   -1.20000
H12B  2    0.614167    0.327256    0.614125    11.00000   -1.20000
AFIX   0
C13   1    0.306411    0.378192    0.225750    11.00000    0.02365    0.01975 =
         0.02261    0.00088    0.00494   -0.00292
C14   1    0.212735    0.417080    0.211910    11.00000    0.02739    0.02675 =
         0.02811    0.00064    0.00980    0.00173
AFIX  43
H14   2    0.204256    0.438143    0.317940    11.00000   -1.20000
AFIX   0
C15   1    0.131803    0.424583    0.040383    11.00000    0.02571    0.03206 =
         0.03650    0.00068    0.00524    0.00448
AFIX  43
H15   2    0.069889    0.450754    0.032917    11.00000   -1.20000
AFIX   0
C16   1    0.142928    0.393376   -0.118822    11.00000    0.02812    0.03216 =
         0.02920    0.00237    0.00125   -0.00226
AFIX  43
H16   2    0.088540    0.397880   -0.232771    11.00000   -1.20000
AFIX   0
C17   1    0.235781    0.355416   -0.106710    11.00000    0.03380    0.02888 =
         0.02492   -0.00329    0.00657   -0.00241
AFIX  43
H17   2    0.244055    0.334854   -0.213314    11.00000   -1.20000
AFIX   0
C18   1    0.316468    0.347844    0.063119    11.00000    0.02471    0.02623 =
         0.02814   -0.00149    0.00734   -0.00012
AFIX  43
H18   2    0.378392    0.322135    0.069079    11.00000   -1.20000
AFIX   0
HKLF 4


REM  mx5831_a.res in Cc
REM R1 =  0.0360 for    3448 Fo > 4sig(Fo)  and  0.0367 for all    3518 data
REM    218 parameters refined using      2 restraints

END

WGHT      0.0438      0.6618

REM Highest difference peak  0.193,  deepest hole -0.305,  1-sigma level  0.045
Q1    1   0.5098  0.3060  0.5221  11.00000  0.05    0.19
Q2    1   0.6667  0.4743  0.9646  11.00000  0.05    0.19
Q3    1   0.6124  0.4273  0.8955  11.00000  0.05    0.17
Q4    1   0.6775  0.4051  0.9944  11.00000  0.05    0.17
Q5    1   0.1745  0.2976 -0.0827  11.00000  0.05    0.16
Q6    1   0.0235  0.3533 -0.2587  11.00000  0.05    0.16
Q7    1   0.6872  0.6161  0.7373  11.00000  0.05    0.15
Q8    1   0.7016  0.3933  0.9429  11.00000  0.05    0.15
Q9    1   0.3958  0.2269  0.3523  11.00000  0.05    0.14
Q10   1   0.4844  0.3190  0.7739  11.00000  0.05    0.14
Q11   1   0.5224  0.3065  0.7058  11.00000  0.05    0.14
Q12   1   0.7383  0.4897  1.2138  11.00000  0.05    0.14
Q13   1   0.2253  0.5362  0.3131  11.00000  0.05    0.14
Q14   1  -0.0054  0.5413 -0.0483  11.00000  0.05    0.14
Q15   1   0.8024  0.6805  1.1280  11.00000  0.05    0.13
Q16   1   0.4278  0.2467  0.3095  11.00000  0.05    0.13
Q17   1   0.7007  0.2584  0.6594  11.00000  0.05    0.13
Q18   1   0.7803  0.3825  1.0619  11.00000  0.05    0.13
Q19   1   0.2815  0.5349  0.5283  11.00000  0.05    0.13
Q20   1   0.4226  0.3365  0.4254  11.00000  0.05    0.12
;
_shelx_res_checksum               4704
_shelx_hkl_file
;
   0   0  -1    0.27    0.29
   0   0  -1    0.77    0.38
   0   0  -1    1.20    0.64
   0   0   1    0.38    0.79
   0   0  -3    0.93    0.67
   0   0  -3    4.16    1.40
   0   0  -3    3.10    1.23
   0   0   3    2.14    1.35
   0   0  -4  393.80   10.10
   0   0  -4  470.58   13.84
   0   0  -4  423.29   13.37
   0   0  -5    1.69    1.22
   0   0  -5    5.61    2.32
   0   0   5    3.74    1.67
   0   0  -6  364.10   18.09
   0   0  -6  312.92   16.58
   0   0   6  347.12   18.67
   0   0  -7    1.77    1.49
   0   0  -7    5.85    2.53
   0   0   7   13.66    3.77
   0   0  -8   14.69    2.47
   0   0  -8   26.37    4.50
   0   0  -9    6.76    3.68
   0   0   9    1.01    2.69
   0  -2   0  648.02   12.85
   0   2   0  580.62   11.13
   0  -2   0  674.57   13.36
   0  -2   1 1404.22   26.96
   0   2   1 1551.65   30.10
   0  -2  -1 1501.95   28.99
   0  -2   1 1407.17   27.18
   0  -2   2 1847.38   35.53
   0   2  -2 1823.32   35.01
   0  -2  -2 1996.80   39.00
   0  -2   2 1771.37   36.26
   0  -2   3  427.24    9.26
   0   2  -3  382.25    8.33
   0  -2  -3  386.19    9.05
   0   2   3  390.64    8.98
   0  -2  -3  403.64    9.74
   0   2   3  456.56   10.61
   0   2  -3  366.62    9.09
   0   2   3  409.17    9.98
   0  -2  -3  387.22    9.95
   0  -2   3  371.50   10.31
   0   2  -4  413.56   12.11
   0  -2  -4  385.40   11.88
   0   2  -4  472.03   13.74
   0  -2  -4  406.02   12.90
   0   2  -4  467.39   14.66
   0   2   4  399.21   12.88
   0  -2   4  432.44   14.65
   0   2  -5  377.82   16.05
   0  -2  -5  411.18   17.81
   0   2  -5  447.28   18.92
   0  -2  -5  420.88   18.77
   0   2  -5  491.21   21.62
   0   2   5  423.56   19.02
   0  -2   5  409.63   19.06
   0  -2  -6  896.85   42.67
   0   2  -6  842.31   39.83
   0  -2  -6  763.16   37.26
   0   2  -6  902.47   43.65
   0   2   6  790.68   38.63
   0  -2   6  747.72   37.25
   0  -2  -7   41.56    4.14
   0   2  -7   48.59    4.49
   0  -2  -7   51.64    5.52
   0   2  -7   37.42    4.56
   0   2   7   34.58    4.75
   0  -2   7   47.12    5.61
   0  -2  -8  220.57   16.45
   0  -2  -8  216.20   17.03
   0   2  -8  259.56   19.96
   0   2   8  251.04   19.27
   0  -2   8  217.47   17.52
   0  -2  -9  214.01   20.28
   0   2  -9  217.37   20.75
   0   2   9  170.60   16.68
   0  -2   9  191.71   18.65
   0  -4   0  919.95   18.69
   0   4   0  789.14   15.27
   0   4   0  947.41   18.27
   0  -4   0  800.55   16.89
   0  -4   0  978.05   20.40
   0   4  -1  171.38    4.33
   0   4   1  170.00    4.64
   0  -4  -1  195.56    4.48
   0   4   1  218.80    4.94
   0   4  -1  183.02    4.40
   0  -4   1  190.56    4.33
   0   4   1  206.08    5.18
   0  -4  -1  197.90    4.92
   0   4  -1  171.88    5.55
   0  -4   2 1279.44   25.17
   0   4  -2 1197.76   23.72
   0  -4  -2 1209.04   24.73
   0   4   2 1232.09   24.99
   0  -4  -2 1150.75   23.12
   0   4   2 1190.92   23.88
   0   4  -2 1133.64   22.92
   0   4  -2 1215.13   26.42
   0  -4   3 2211.98   49.57
   0   4  -3 2149.27   47.86
   0  -4  -3 2171.93   49.29
   0  -4  -3 2264.70   51.17
   0   4   3 2007.27   45.46
   0   4  -3 2422.90   54.78
   0   4   3 2095.46   47.51
   0  -4   3 2267.51   53.80
   0  -4   4  685.40   19.38
   0   4  -4  697.01   19.64
   0  -4  -4  597.58   17.90
   0  -4  -4  712.38   21.12
   0   4  -4  727.19   21.66
   0   4   4  718.91   21.27
   0  -4   4  770.56   24.78
   0   4  -5  363.37   15.45
   0  -4  -5  368.98   16.42
   0   4  -5  404.05   17.11
   0  -4  -5  434.79   19.32
   0   4  -5  437.72   19.63
   0   4   5  424.14   18.86
   0  -4   5  371.35   18.13
   0  -4  -6 1478.48   70.00
   0   4  -6 1602.19   75.06
   0  -4  -6 1524.87   72.51
   0   4  -6 1468.53   70.03
   0   4   6 1585.98   75.41
   0  -4   6 1690.45   81.42
   0  -4  -7  119.88    9.72
   0   4  -7  117.91    9.10
   0  -4  -7  125.11   11.00
   0   4  -7  126.78   10.71
   0   4   7  119.13   10.16
   0  -4   7  159.06   13.86
   0  -4  -8  128.44   10.68
   0  -4  -8  114.92   10.32
   0   4   8  121.74   10.41
   0  -4   8  120.15   11.13
   0  -4  -9   27.33    5.08
   0   4   9   13.58    3.68
   0  -4   9   20.22    4.84
   0  -6   0  365.89    8.85
   0   6   0  337.07    7.57
   0   6   0  313.52    6.52
   0  -6   0  321.09    8.11
   0  -6   0  290.75    8.27
   0  -6   1  308.18    7.50
   0   6  -1  296.22    7.24
   0  -6  -1  329.51    8.39
   0  -6  -1  350.46    7.65
   0   6   1  291.12    6.46
   0   6  -1  301.24    6.80
   0  -6   1  320.85    6.88
   0  -6  -1  298.50    7.50
   0   6  -1  312.25    8.98
   0  -6   2   76.70    3.05
   0   6  -2   66.92    2.72
   0  -6  -2   61.18    3.06
   0   6   2   75.04    2.90
   0   6  -2   78.67    3.04
   0  -6   2   68.67    2.57
   0   6   2   85.80    3.47
   0  -6  -2   73.36    3.11
   0  -6   2   82.34    5.44
   0  -6   3  494.46   14.27
   0   6  -3  507.88   14.73
   0  -6  -3  508.83   15.70
   0  -6  -3  540.05   15.86
   0   6  -3  536.90   16.13
   0   6   3  570.65   17.00
   0  -6   3  582.50   19.56
   0  -6   4  203.03    8.61
   0   6  -4  161.71    7.03
   0  -6  -4  166.56    8.02
   0  -6  -4  189.93    8.65
   0   6  -4  174.03    8.12
   0   6   4  172.37    7.93
   0  -6   4  207.82   11.17
   0  -6   5   97.25    3.97
   0  -6  -5   94.29    5.08
   0  -6  -5   92.34    4.99
   0   6  -5  119.17    5.87
   0   6   5  111.65    5.31
   0  -6   5  105.95    7.04
   0  -6  -6  263.57   14.76
   0   6  -6  250.27   13.25
   0  -6  -6  226.87   13.03
   0   6  -6  236.69   13.88
   0   6   6  254.17   14.40
   0  -6   6  275.33   17.15
   0  -6  -7   76.38    6.32
   0  -6  -7   96.50    7.63
   0   6  -7   68.88    6.41
   0   6   7   55.79    5.05
   0  -6   7   71.53    7.75
   0  -6  -8  212.94   18.06
   0  -6  -8  219.67   18.84
   0   6  -8  185.38   16.52
   0   6   8  201.45   17.27
   0  -6   8  238.45   21.33
   0  -8   0   73.95    3.65
   0   8   0   67.05    2.47
   0   8   0   58.09    2.01
   0  -8   0   73.64    4.38
   0  -8   1 3036.93   68.08
   0  -8  -1 2635.48   59.88
   0  -8  -1 2735.54   60.21
   0   8   1 3007.94   66.38
   0   8  -1 3078.91   68.07
   0  -8   1 2925.74   64.44
   0   8   1 3442.70   77.41
   0  -8   1 3080.94   71.29
   0  -8   2  469.29   14.17
   0  -8  -2  447.20   14.31
   0  -8  -2  493.14   14.24
   0   8   2  465.76   13.64
   0   8  -2  436.70   13.08
   0  -8   2  397.72   11.63
   0   8   2  427.20   13.36
   0  -8   2  444.66   15.83
   0  -8   3  457.59   17.89
   0  -8  -3  418.62   17.32
   0  -8  -3  435.28   17.13
   0   8  -3  487.77   19.35
   0   8   3  498.43   20.13
   0  -8   3  522.43   22.99
   0  -8   4  186.21    8.60
   0  -8  -4  196.78   10.01
   0  -8  -4  224.75   10.42
   0   8  -4  180.95    9.09
   0   8   4  204.08   10.30
   0  -8   5  241.07   12.30
   0  -8  -5  257.39   13.96
   0  -8  -5  236.20   12.46
   0   8  -5  256.12   13.83
   0   8   5  247.84   13.25
   0  -8   5  233.40   14.57
   0  -8   6   10.38    2.24
   0  -8  -6    5.06    2.41
   0  -8  -6   16.05    2.53
   0   8  -6   10.94    2.44
   0   8   6   24.94    3.18
   0  -8   6    7.61    4.27
   0  -8  -7   25.43    3.56
   0  -8  -7   22.95    3.10
   0   8  -7   14.59    2.99
   0   8   7   23.55    3.27
   0  -8   7   42.03    5.92
   0  -8  -8  215.11   18.73
   0  -8  -8  206.61   17.93
   0   8  -8  218.16   19.35
   0   8   8  216.22   18.82
   0  -8   8  237.82   22.06
   0 -10   0    1.51    1.85
   0  10   0    0.79    0.47
   0  10   0    3.41    0.90
   0 -10   0    3.92    2.77
   0 -10   1  461.49   18.55
   0 -10  -1  432.35   17.79
   0  10   1  469.02   17.91
   0  10  -1  442.02   17.01
   0  10   1  494.27   18.70
   0  10   1  444.67   18.27
   0 -10   1  462.21   20.04
   0 -10   2  282.30   11.98
   0 -10  -2  251.06   11.37
   0 -10  -2  323.36   13.11
   0  10   2  282.95   11.44
   0  10  -2  300.69   12.23
   0  10   2  262.75   11.51
   0 -10   2  318.73   15.46
   0 -10   3  552.17   23.46
   0 -10  -3  556.77   23.73
   0  10  -3  492.76   21.13
   0  10   3  580.84   25.09
   0 -10   3  570.71   27.21
   0 -10   4  165.58    8.80
   0 -10  -4  164.31   10.02
   0 -10  -4  172.32    9.15
   0  10  -4  193.01   10.57
   0  10   4  159.57    9.60
   0 -10   4  164.47   11.41
   0 -10   5   82.99    4.39
   0 -10  -5   77.13    5.62
   0 -10  -5   92.59    6.04
   0  10  -5   83.40    5.30
   0  10   5   85.46   10.74
   0 -10   5  107.12    8.64
   0 -10   6   68.33    4.92
   0 -10  -6   46.99    5.23
   0 -10  -6   75.60    5.85
   0  10  -6   69.46    6.10
   0  10   6   76.26   16.48
   0 -10   6   87.81    8.93
   0 -10  -7  278.40   23.36
   0 -10  -7  289.65   23.75
   0  10  -7  294.04   24.51
   0  10   7  285.11   23.77
   0 -10   7  339.72   29.48
   0 -10  -8   76.88    7.99
   0 -10  -8   78.82    7.73
   0  10  -8   99.30    9.71
   0  10   8   55.12   15.43
   0 -10   8   85.43   10.42
   0 -12   0   87.78    5.57
   0  12   0   80.60    3.98
   0  12   0   83.09    4.04
   0 -12   0   97.69    7.19
   0 -12   1  696.04   20.92
   0 -12  -1  675.56   20.76
   0  12   1  563.39   15.76
   0  12  -1  737.80   20.58
   0  12   1  632.63   17.27
   0 -12   1  664.54   22.38
   0 -12  -1  598.26   19.84
   0 -12   2  601.72   29.34
   0 -12  -2  737.45   22.77
   0 -12  -2  565.14   15.73
   0  12  -2  658.64   18.94
   0  12   2  587.19   23.47
   0 -12   2  699.03   24.00
   0 -12   3 1590.89   75.00
   0 -12  -3 1667.46   79.32
   0 -12  -3 1567.79   73.95
   0  12  -3 1561.35   73.49
   0  12   3 1727.85   81.84
   0 -12   3 1581.47   77.67
   0 -12   4  120.32    7.28
   0 -12  -4  115.98    8.01
   0 -12  -4  113.65    7.41
   0  12  -4  105.20    6.97
   0  12   4  136.83   13.62
   0 -12   4  108.35    9.33
   0 -12   5  177.18   11.66
   0 -12  -5  187.95   13.10
   0 -12  -5  205.61   13.08
   0  12  -5  205.90   13.61
   0  12   5  146.66   22.48
   0 -12   5  212.90   16.50
   0 -12  -6   68.31    8.63
   0 -12  -6   38.44    9.58
   0  12  -6   52.88    6.78
   0  12   6   44.65   14.52
   0 -12   6   65.49   10.16
   0 -12  -7   46.30    8.41
   0 -12  -7   27.53   11.10
   0  12  -7   42.57    7.78
   0  12   7   37.49   10.68
   0 -12   7   22.65    6.30
   0 -14   0    3.21    1.98
   0  14   0    6.25    0.96
   0 -14   0    1.35    3.11
   0 -14   1  637.73   31.58
   0 -14  -1  618.62   30.90
   0  14  -1  683.88   32.59
   0  14   1  724.27   34.16
   0 -14   1  646.21   33.76
   0 -14  -1  691.37   35.71
   0 -14   2  159.05    9.63
   0 -14  -2  153.10    9.96
   0  14  -2  156.77    8.87
   0  14   2  156.00    8.38
   0  14   2  159.50   10.13
   0 -14   2  166.21   11.95
   0 -14   3   12.15    2.15
   0 -14  -3   20.51    3.05
   0 -14  -3   15.66    1.50
   0  14  -3   21.47    2.40
   0  14   3   18.54    5.10
   0 -14   3   13.17    3.50
   0 -14   4   86.94    6.50
   0 -14  -4   87.52    7.45
   0 -14  -4   76.03    5.45
   0  14  -4   75.76    6.18
   0  14   4   84.97    7.74
   0 -14   4   74.72    8.80
   0 -14   5   28.79    4.82
   0 -14  -5   35.15    5.47
   0 -14  -5   19.30    5.72
   0  14  -5   30.75    4.57
   0  14   5   30.18   10.83
   0 -14   5   36.78    6.60
   0 -14  -6  131.65   13.31
   0  14  -6  152.71   14.23
   0  14   6  122.61   12.00
   0 -14   6  107.34   13.05
   0 -16   0   99.03    8.72
   0  16   0  105.95    8.01
   0 -16   0   97.74    9.58
   0 -16   1   78.55    6.63
   0 -16  -1   83.72    7.20
   0  16  -1   95.32    6.35
   0 -16   1   73.15    7.31
   0 -16  -1  118.28   10.98
   0 -16   2   63.07    5.49
   0 -16  -2   73.52    6.63
   0  16  -2   77.45    5.52
   0 -16   2   60.33    7.64
   0 -16  -2   88.33    9.06
   0 -16   3  117.61    9.04
   0 -16  -3  124.23   10.05
   0  16  -3  106.59    7.83
   0  16   3   97.83    8.31
   0 -16   3  114.02   11.40
   0 -16   4  108.92    8.99
   0 -16  -4  115.21   10.34
   0  16  -4  119.17    9.67
   0  16   4  136.13   15.61
   0 -16   4  118.74   12.67
   0 -16  -5   74.43   15.56
   0  16  -5   69.98   11.61
   0  16   5   63.72   11.03
   0 -16   5   61.50   11.92
   0 -18   0   56.83    7.19
   0 -18   0   54.75    8.38
   0 -18   1   42.25    6.06
   0 -18   1   22.94    5.92
   0 -18  -1   18.67    4.31
   0 -18   2   13.64    3.53
   0 -18  -2    4.75    2.65
   0 -18   2    2.91    3.89
   0 -18  -2    8.47    3.54
   0 -18   3   13.91    3.13
   0 -18  -3   10.27    4.30
   0 -18   3   14.10    5.73
   0 -18  -3    3.40    2.98
   0 -18   4    3.86    2.00
   0 -18  -4    4.93    3.36
   0  18   4    2.91    2.55
   0 -18   4    2.97    4.52
   0 -20   0   31.97    7.59
   0 -20   0   50.13    8.83
   0 -20   1   30.68    7.25
   0 -20  -1   41.00    9.27
   0 -20   1    9.78    5.30
   0 -20  -1   34.96    8.97
   0 -20   2   32.52    5.80
   0 -20  -2   18.76    4.95
   0 -20   2   10.82    4.56
   0 -20  -2   15.95    5.81
   1  -1  -9   39.75    7.49
   1   1  -9   48.81    9.14
  -1   1   9   40.02    7.68
  -1  -1   9   45.78    8.52
   1  -1  -8   30.74    3.20
   1  -1  -8   39.17    4.66
   1   1  -8   42.86    5.04
  -1   1   8   29.05    4.02
  -1  -1   8   30.79    4.29
   1  -1  -7  809.18   30.20
   1   1  -7  798.69   29.60
   1  -1  -7  825.56   32.46
   1   1  -7  820.60   32.17
  -1   1   7  825.27   32.42
  -1  -1   7  879.96   34.63
   1  -1  -6  344.75   17.05
   1   1  -6  372.64   18.15
   1  -1  -6  428.91   21.86
   1   1  -6  364.79   18.80
  -1   1   6  382.95   19.93
  -1  -1   6  366.00   19.46
   1   1  -5  478.39   19.09
   1  -1  -5  584.99   22.58
   1   1  -5  571.09   21.89
   1  -1  -5  622.87   24.79
   1   1  -5  482.24   19.75
  -1   1   5  472.03   19.53
  -1  -1   5  515.45   21.43
   1   1  -4   47.97    2.17
   1  -1  -4   46.64    2.28
   1   1  -4   40.85    1.87
  -1   1   4   52.38    2.30
   1  -1  -4   42.42    2.72
   1   1  -4   56.17    3.16
  -1   1   4   53.56    3.14
  -1  -1   4   50.82    3.65
   1   1  -3 1275.11   24.83
   1  -1  -3 1286.84   25.55
   1   1  -3 1318.45   25.66
  -1   1   3 1249.41   24.74
   1  -1  -3 1366.62   27.85
  -1  -1   3 1196.97   24.47
   1  -1  -3 1279.21   27.00
  -1  -1   3 1178.36   25.45
   1   1  -2 2423.01   45.92
   1  -1  -2 2339.90   44.87
  -1   1   2 2158.85   41.47
   1   1  -2 2540.39   48.15
   1  -1  -2 2334.58   45.33
  -1  -1   2 2228.38   43.19
  -1   1   2 2453.95   47.60
   1  -1  -2 2448.91   47.87
  -1  -1   2 2654.13   52.35
  -1  -1   1 3910.25   74.76
  -1  -1   0 2535.20   48.16
  -1   1   0 2459.02   46.71
   1  -1   1 3029.30   57.69
   1   1   1 3015.48   57.49
  -1  -1  -1 3086.26   58.77
   1   1   1 3224.46   61.27
   1   1   1 3380.29   64.55
  -1   1  -1 3220.64   62.25
  -1  -1  -2 1359.75   26.85
  -1   1  -2 1281.91   25.25
  -1  -1  -2 1169.89   23.40
  -1  -1  -2 1266.77   25.39
  -1   1  -2 1353.81   27.12
   1   1   2 1262.98   25.77
  -1   1  -2 1390.19   29.06
  -1  -1  -3 1322.52   30.40
  -1   1  -3 1371.87   31.09
  -1  -1  -3 1370.65   31.41
  -1   1  -3 1592.44   35.99
  -1  -1  -3 1548.89   35.74
  -1   1  -3 1541.84   35.64
   1   1   3 1635.29   38.08
   1  -1   3 1507.88   35.77
  -1   1  -4  165.17    6.91
  -1  -1  -4  172.11    6.21
  -1   1  -4  176.47    6.24
  -1  -1  -4  165.57    6.53
  -1   1  -4  187.12    7.33
   1   1   4  163.94    6.81
   1  -1   4  173.46    7.35
  -1  -1  -5 1710.30   46.29
  -1   1  -5 1663.68   67.72
  -1  -1  -5 1731.00   47.74
  -1   1  -5 1646.67   67.82
   1   1   5 1569.51   65.02
   1  -1   5 1687.16   47.31
  -1  -1  -6  489.80   24.26
  -1   1  -6  468.28   23.10
  -1  -1  -6  463.38   23.68
  -1   1  -6  517.40   26.28
   1   1   6  494.03   25.32
   1  -1   6  427.99   22.57
  -1  -1  -7  106.48    8.67
  -1   1  -7  122.96    9.87
  -1  -1  -7  129.93   11.00
  -1   1  -7  115.58   10.06
   1   1   7  139.20   12.23
   1  -1   7  100.50    9.21
  -1  -1  -8   46.57    5.88
  -1   1  -8   54.09    6.42
  -1  -1  -8   51.68    7.19
  -1   1  -8   64.94    8.48
   1   1   8   67.81    8.14
   1  -1   8   56.70    7.65
  -1   1  -9   31.99    5.20
  -1  -1  -9   41.05    6.75
   1   1   9   27.17    5.22
   1  -1   9   37.83    6.58
   1  -3  -9  107.30   10.64
   1   3  -9  128.00   12.62
  -1   3   9  112.15   11.04
  -1  -3   9   96.86   10.42
   1  -3  -8  119.00    8.82
   1  -3  -8  122.82    9.81
   1   3  -8  110.70    9.17
  -1   3   8  102.36    8.55
  -1  -3   8  106.03    9.30
   1  -3  -7   13.94    1.99
   1   3  -7   17.02    1.89
   1  -3  -7    8.33    2.10
  -1   3   7   18.74    2.86
  -1  -3   7   12.03    3.28
   1   3  -6  986.81   46.04
   1  -3  -6 1257.50   59.20
   1   3  -6 1094.14   51.12
   1  -3  -6 1465.86   69.40
  -1   3   6 1283.85   60.99
  -1  -3   6 1161.31   56.44
   1   3  -5 1475.25   54.55
   1  -3  -5 1429.73   53.68
   1   3  -5 1611.70   59.65
   1  -3  -5 1767.04   66.50
   1   3  -5 1719.35   64.86
  -1   3   5 1650.06   62.27
  -1  -3   5 1787.13   68.62
   1   3  -4  568.82   15.86
   1  -3  -4  564.81   16.69
   1   3  -4  551.06   15.44
   1  -3  -4  508.87   15.64
   1   3  -4  569.79   17.29
  -1   3   4  542.42   16.37
  -1  -3   4  596.86   19.66
  -1  -3   3  382.44    8.09
   1   3  -3  402.74    8.43
   1  -3  -3  394.83    9.30
  -1   3   3  400.96    9.34
   1  -3  -3  347.94    8.61
  -1   3   3  343.05    8.42
  -1   3   3  335.90    8.22
   1  -3  -3  335.40    8.53
  -1  -3   3  357.77   10.71
  -1  -3   2 1181.95   22.81
   1   3  -2 1358.12   26.17
   1  -3  -2 1286.99   25.60
   1   3  -2 1196.21   23.93
   1  -3  -2 1269.62   25.22
  -1  -3   2 1363.21   29.29
  -1  -3   1 4626.44   89.33
   1  -3   0 2561.27   49.23
  -1  -3   0 2543.07   48.81
   1   3   0 2440.30   47.20
  -1   3   0 2468.10   47.78
   1   3   1 6170.04  117.26
   1   3   1 5856.98  111.33
  -1   3  -1 5609.20  107.62
   1  -3   2 1634.14   32.12
  -1   3  -2 1587.20   31.07
  -1  -3  -2 1564.62   31.28
   1   3   2 1537.78   30.56
  -1  -3  -2 1693.92   33.38
   1   3   2 1461.96   28.90
   1  -3   2 1437.63   28.52
   1   3   2 1628.53   32.44
  -1  -3  -2 1499.86   30.18
  -1   3  -2 1609.75   33.99
   1  -3   3 1553.49   35.34
  -1   3  -3 1228.82   27.99
  -1  -3  -3 1240.52   29.02
  -1  -3  -3 1525.50   35.18
   1   3   3 1245.38   29.33
   1  -3   4 1300.01   35.92
  -1   3  -4 1175.53   32.42
  -1  -3  -4 1111.29   31.52
  -1  -3  -4 1267.63   35.89
  -1   3  -4 1330.42   37.78
   1   3   4 1390.15   39.31
  -1  -3  -5    3.58    1.30
  -1   3  -5    4.45    1.06
  -1   3  -5   11.56    3.04
   1   3   5    6.51    1.61
   1  -3   5   10.20    2.56
  -1  -3  -6   26.97    2.71
  -1   3  -6   31.00    2.63
  -1  -3  -6   27.75    3.35
  -1   3  -6   27.00    3.41
   1   3   6   33.41    3.72
   1  -3   6   22.01    3.40
  -1  -3  -7   13.22    2.26
  -1   3  -7   16.32    2.06
  -1  -3  -7   16.16    2.70
  -1   3  -7   24.47    3.61
   1   3   7   15.10    3.12
   1  -3   7   18.04    3.94
  -1  -3  -8   75.43    7.31
  -1  -3  -8   61.44    6.93
  -1   3  -8   52.09    6.70
   1   3   8   75.41    8.23
   1  -3   8   92.72    9.69
  -1  -3  -9   76.58    8.28
  -1   3  -9   75.77    8.50
   1   3   9   75.45    8.26
   1  -3   9   75.53    8.59
   1  -5  -9   62.79    7.19
  -1   5   9   48.68   10.40
  -1  -5   9   46.98   10.49
   1  -5  -8   82.41    7.39
   1  -5  -8   86.79    8.04
   1   5  -8  104.67    9.53
  -1   5   8   85.73    7.78
  -1  -5   8   65.83    8.96
   1  -5  -7  181.98   14.04
   1   5  -7  170.06   12.51
   1  -5  -7  162.53   13.13
   1   5  -7  166.07   13.66
  -1   5   7  162.15   12.85
  -1  -5   7  210.46   17.72
   1  -5  -6  273.47   14.46
   1   5  -6  239.25   11.94
   1  -5  -6  227.05   12.57
   1   5  -6  235.14   13.14
  -1   5   6  250.65   13.51
  -1  -5   6  253.18   15.36
  -1  -5   5   50.58    2.82
   1   5  -5   42.30    2.64
   1  -5  -5   46.92    3.45
   1  -5  -5   63.46    4.15
   1   5  -5   58.10    4.26
  -1   5   5   52.39    3.65
  -1  -5   5   62.20    5.56
  -1  -5   4   87.45    3.46
   1   5  -4   90.23    3.40
   1  -5  -4  100.96    4.61
   1  -5  -4   84.15    4.13
   1   5  -4   85.82    4.17
  -1   5   4   79.79    3.78
  -1  -5   4   86.48    5.92
  -1  -5   3 1712.11   38.50
   1   5  -3 1680.08   37.55
   1  -5  -3 1820.80   41.88
   1  -5  -3 1691.77   38.61
   1   5  -3 1698.80   38.94
  -1   5   3 1902.00   43.18
   1  -5  -3 1865.85   42.63
  -1  -5   3 1937.00   47.10
  -1  -5   2  986.73   19.78
   1   5  -2  886.85   17.91
   1  -5  -2 1001.87   21.09
  -1   5   2  887.38   18.73
   1  -5  -2  846.37   17.61
  -1   5   2  894.17   18.42
   1   5  -2  856.79   17.64
  -1  -5   2  971.17   19.60
   1  -5  -2  941.16   19.26
   1   5  -2  812.06   18.96
  -1  -5   1 3538.56   67.85
   1   5  -1 3740.73   71.64
  -1   5   1 3658.20   70.57
  -1   5   1 3848.15   73.45
   1   5  -1 3793.98   72.05
  -1  -5   1 3901.68   73.88
  -1   5   1 3750.88   71.94
   1  -5  -1 4110.17   78.58
  -1  -5   1 3990.03   78.35
   1   5  -1 3425.67   67.23
   1  -5   0 5769.98  110.05
  -1  -5   0 5420.66  103.52
   1  -5   0 6176.43  117.55
  -1  -5   0 5847.92  111.73
   1  -5   0 6282.49  138.66
  -1   5  -1   23.03    1.45
  -1  -5  -1   22.10    1.74
  -1  -5  -1   28.52    3.04
   1   5   1   19.41    1.04
  -1   5  -1   22.11    1.27
   1  -5   1   25.44    1.25
   1   5   1   29.37    4.90
   1  -5   1   18.86    2.06
   1  -5   2  660.10   15.76
  -1   5  -2  658.83   15.80
  -1  -5  -2  706.19   16.68
   1   5   2  669.25   15.82
  -1   5  -2  610.16   14.93
   1  -5   2  643.13   15.23
   1   5   2  625.54   15.50
  -1  -5  -2  656.09   16.05
   1  -5   2  693.08   18.83
   1  -5   3 1333.84   31.30
  -1   5  -3 1308.20   30.12
  -1  -5  -3 1259.04   29.89
  -1  -5  -3 1285.60   29.95
  -1   5  -3 1316.73   30.90
   1  -5   4  195.95   10.07
  -1  -5  -4  184.38    8.53
  -1  -5  -4  190.53    8.67
  -1   5  -4  169.52    8.11
   1   5   4  188.39    8.62
   1  -5   4  167.15    9.38
   1  -5   5  176.70    6.33
  -1  -5  -5  154.69    6.57
  -1  -5  -5  169.46    7.01
  -1   5  -5  165.44    7.14
   1   5   5  188.61    7.68
   1  -5   5  137.24    7.53
  -1  -5  -6  208.60   12.15
  -1   5  -6  194.31   10.70
  -1  -5  -6  230.31   13.32
  -1   5  -6  185.54   11.43
   1   5   6  195.87   11.68
   1  -5   6  191.85   12.58
  -1  -5  -7  324.32   26.15
  -1   5  -7  316.15   24.93
  -1  -5  -7  363.14   29.26
  -1   5  -7  359.55   29.13
   1   5   7  324.61   26.42
   1  -5   7  260.29   22.11
  -1  -5  -8   77.99    8.00
  -1  -5  -8   53.12    6.35
  -1   5  -8   78.37    8.50
   1   5   8   90.95    9.37
   1  -5   8   93.00   10.43
   1  -7  -8  126.72   11.69
   1  -7  -8  137.28   12.51
   1   7  -8  135.71   12.73
  -1   7   8  128.24   11.84
  -1  -7   8  152.27   15.06
   1  -7  -7  292.62   18.63
   1  -7  -7  250.97   16.25
   1   7  -7  271.79   17.76
  -1   7   7  256.61   16.63
  -1  -7   7  334.27   22.92
  -1  -7   6  168.70    9.07
   1  -7  -6  194.13   11.37
   1  -7  -6  162.40    9.94
   1   7  -6  179.40   10.93
  -1   7   6  157.81    9.62
  -1  -7   6  206.58   14.37
  -1  -7   5  330.86   16.50
   1   7  -5  267.80   13.17
   1  -7  -5  279.14   14.65
   1  -7  -5  278.27   14.36
   1   7  -5  301.64   15.67
  -1   7   5  319.74   16.31
  -1  -7   5  274.50   16.30
  -1  -7   4  328.20   13.26
   1   7  -4  329.61   13.00
   1  -7  -4  319.23   13.66
   1  -7  -4  342.13   14.07
   1   7  -4  328.56   13.75
  -1   7   4  352.42   14.49
  -1  -7   4  348.72   16.66
  -1  -7   3 1308.71   35.89
   1   7  -3 1270.84   34.93
   1  -7  -3 1285.97   36.51
   1  -7  -3 1278.71   35.99
   1   7  -3 1364.48   37.91
  -1   7   3 1262.42   35.41
  -1  -7   3 1384.90   41.83
  -1  -7   2   57.98    2.55
   1   7  -2   60.29    2.64
   1  -7  -2   63.44    2.57
  -1   7   2   64.80    2.69
   1   7  -2   65.07    2.65
   1  -7  -2   62.77    2.84
  -1  -7   1  113.69    4.05
   1  -7  -1  103.56    4.28
   1   7  -1  111.22    4.04
   1  -7  -1  100.76    3.05
  -1   7   1  126.10    3.82
   1   7  -1  107.25    3.18
  -1  -7   1   99.29    2.76
  -1   7   1  119.89    5.42
   1  -7  -1  108.59    3.79
  -1  -7   1  120.27    5.73
   1  -7   0 3610.36   80.46
  -1  -7   0 3216.65   71.89
   1   7   0 3271.00   72.94
  -1   7   0 3563.42   78.50
   1   7   0 3185.45   69.71
   1   7   0 3486.18   76.18
  -1   7   0 3161.44   69.55
   1   7   0 3286.49   73.81
   1  -7   0 3013.49   67.43
  -1  -7   0 3353.34   74.86
   1  -7   1 2188.34   49.60
  -1   7  -1 2042.98   46.33
  -1  -7  -1 2195.96   50.13
  -1  -7  -1 2401.39   52.88
   1   7   1 2032.26   45.01
  -1   7  -1 2192.73   48.91
   1  -7   1 1902.54   42.32
   1  -7   1 2159.16   50.95
   1  -7   2 1494.21   34.42
  -1  -7  -2 1546.93   36.40
  -1  -7  -2 1426.29   32.35
   1   7   2 1397.32   31.73
  -1   7  -2 1476.18   33.96
   1   7   2 1346.56   33.24
   1  -7   2 1622.70   40.32
   1  -7   3  123.33    4.72
  -1  -7  -3  104.20    5.00
  -1  -7  -3  106.47    4.19
  -1   7  -3  114.07    5.05
   1   7   3  115.61    5.19
   1  -7   3  121.91    7.10
   1  -7   4   55.00    3.54
  -1  -7  -4   43.77    3.48
  -1  -7  -4   59.62    3.75
  -1   7  -4   64.00    4.25
   1   7   4   57.50    4.13
   1  -7   4   56.43    5.43
   1  -7   5  334.03   17.93
  -1  -7  -5  313.66   16.44
  -1  -7  -5  307.05   15.86
  -1   7  -5  377.14   19.43
   1   7   5  359.67   18.49
   1  -7   5  381.41   21.23
   1  -7   6  338.58   13.95
  -1  -7  -6  391.44   16.76
  -1  -7  -6  356.70   15.25
  -1   7  -6  383.62   16.69
   1   7   6  357.98   15.46
   1  -7   6  358.38   17.30
  -1  -7  -7  155.96   11.55
  -1  -7  -7  181.70   13.06
  -1   7  -7  194.04   14.32
   1   7   7  190.62   13.77
   1  -7   7  163.41   13.06
  -1  -7  -8    9.56    3.07
  -1  -7  -8    5.86    2.41
  -1   7  -8    5.23    3.66
   1   7   8    6.44    2.62
   1  -7   8    6.77    3.79
   1  -9  -8   76.59    8.01
   1  -9  -8   56.84    9.72
   1   9  -8   68.33   11.68
  -1   9   8   79.75    8.26
  -1  -9   8   96.32   11.76
   1  -9  -7  214.90   15.26
   1  -9  -7  203.24   14.22
   1   9  -7  176.10   12.93
  -1   9   7  201.96   14.36
  -1  -9   7  222.18   17.53
  -1  -9   6  146.41   10.93
   1  -9  -6  144.87   11.84
   1  -9  -6  142.56   11.29
   1   9  -6  155.64   12.52
  -1   9   6  111.40    9.29
  -1  -9   6  155.99   14.68
  -1  -9   5   43.15    3.42
   1  -9  -5   47.18    4.26
   1  -9  -5   42.57    9.32
   1   9  -5   36.91    3.61
  -1   9   5   38.39    5.05
  -1  -9   5   39.58    5.33
  -1  -9   4  533.65   15.33
   1  -9  -4  535.59   17.13
   1  -9  -4  491.41   14.96
   1   9  -4  530.54   16.28
  -1   9   4  602.04   18.30
  -1  -9   4  540.35   20.29
  -1  -9   3  749.26   28.59
   1  -9  -3  719.05   28.42
   1  -9  -3  698.77   27.54
   1   9  -3  692.66   26.71
  -1   9   3  697.31   28.23
  -1  -9   2 3000.04   81.23
   1  -9  -2 3071.16   84.00
   1  -9  -2 3615.07  132.92
  -1   9   2 3084.01   82.95
   1   9  -2 3339.14  122.73
  -1  -9   2 3112.00   83.34
  -1   9   2 3274.65  121.04
  -1  -9   2 3198.44  119.83
  -1  -9   1  648.60   19.12
   1  -9  -1  670.59   20.20
  -1   9   1  630.00   17.90
   1   9  -1  670.67   18.68
  -1  -9   1  654.18   18.00
  -1   9   1  731.92   21.64
  -1  -9   1  625.58   20.56
   1  -9   0 1183.86   33.59
  -1   9   0 1060.22   29.18
   1   9   0 1133.04   30.67
   1   9   0 1076.69   29.05
  -1   9   0 1211.22   33.10
   1  -9   0 1098.68   32.57
  -1  -9   0 1105.28   32.78
   1  -9   1    7.89    1.42
  -1  -9  -1    7.44    1.89
  -1  -9  -1    3.04    0.44
   1   9   1    2.64    0.51
  -1   9  -1    6.24    0.88
   1  -9   1    2.27    0.62
   1   9   1    7.23    1.57
   1  -9   1    2.45    2.49
   1  -9   2  358.69   14.70
  -1  -9  -2  388.82   15.10
   1   9   2  369.23   14.39
  -1   9  -2  344.35   13.89
   1   9   2  360.31   15.08
   1  -9   2  435.17   19.64
   1  -9   3 1014.10   41.84
  -1  -9  -3 1073.50   44.24
  -1   9  -3 1028.28   42.59
   1   9   3 1026.26   42.90
   1  -9   3  909.81   40.14
   1  -9   4   13.56    2.24
  -1  -9  -4   16.06    2.65
  -1  -9  -4   11.08    1.67
  -1   9  -4   12.39    2.01
   1   9   4   18.35    3.55
   1  -9   4   14.23    3.03
   1  -9   5  254.42   13.67
  -1  -9  -5  255.12   14.73
  -1  -9  -5  238.75   13.20
  -1   9  -5  279.85   15.75
   1   9   5  268.18   23.94
   1  -9   5  259.03   16.56
   1  -9   6   95.79    6.66
  -1  -9  -6  133.33    9.87
  -1  -9  -6  106.66    7.71
  -1   9  -6  106.64    8.17
   1   9   6  113.47    8.58
  -1  -9  -7    7.50    3.28
  -1  -9  -7   18.48    3.45
   1   9   7   16.51    3.37
   1  -9   7   11.09    3.98
  -1  -9  -8  153.89   13.82
  -1  -9  -8  133.23   11.72
  -1   9  -8  126.14   11.82
   1   9   8  141.96   12.91
   1  -9   8  130.01   13.24
   1 -11  -8   12.71    3.39
   1 -11  -8   12.37    4.52
   1  11  -8   18.42    4.28
  -1  11   8   10.08    3.21
  -1 -11   8    9.15    5.16
   1 -11  -7   25.47    4.11
   1 -11  -7   27.19    3.93
   1  11  -7   31.26    4.80
  -1  11   7   31.32    7.17
  -1 -11   7   32.01    6.69
   1 -11  -6   72.66    6.75
   1 -11  -6   71.16    7.80
   1  11  -6   98.59    8.11
  -1  11   6   68.92   16.59
  -1 -11   6   71.26    8.05
  -1 -11   5  373.83   15.06
   1 -11  -5  322.34   14.43
   1 -11  -5  342.64   15.57
   1  11  -5  361.10   15.20
  -1  11   5  349.52   19.86
  -1 -11   4 1269.78   59.81
   1 -11  -4 1386.20   66.34
   1 -11  -4 1202.60   57.41
   1  11  -4 1346.04   63.83
  -1  11   4 1214.42   58.41
  -1 -11   4 1432.42   70.79
  -1 -11   3  558.54   16.70
   1 -11  -3  583.16   17.74
   1  11  -3  557.56   16.48
  -1  11   3  518.16   16.22
  -1 -11   3  531.47   19.41
  -1 -11   2  722.31   30.46
   1 -11  -2  846.24   36.06
   1 -11  -2  714.10   29.30
   1  11  -2  727.84   30.07
  -1  11   2  802.18   34.04
  -1 -11   2  614.54   28.09
  -1 -11   1  147.40    7.60
   1 -11  -1  155.08    8.26
   1  11  -1  128.17    5.68
   1  11  -1  129.97    5.95
  -1  11   1  145.91    6.55
  -1 -11   1  139.82    8.75
   1 -11  -1  151.66    8.61
   1 -11   0  741.61   29.12
  -1 -11   0  768.11   30.07
   1  11   0  660.62   24.95
   1  11   0  648.58   24.19
  -1  11   0  650.77   24.61
   1 -11   0  682.34   28.14
  -1 -11   0  782.18   32.08
   1 -11   1  768.52   32.52
  -1 -11  -1  778.69   33.17
   1  11   1  756.52   30.86
  -1  11  -1  700.39   28.96
   1  11   1  703.52   28.52
   1  11   1  827.47   35.23
   1 -11   1  723.92   31.93
   1 -11   2  775.92   32.75
  -1 -11  -2  631.49   27.59
  -1 -11  -2  667.40   27.45
   1  11   2  576.73   16.26
  -1  11  -2  650.90   27.32
   1  11   2  554.98   26.51
   1 -11   2  627.04   28.65
   1 -11   3  647.90   31.22
  -1 -11  -3  619.24   30.83
  -1 -11  -3  597.63   28.46
  -1  11  -3  586.17   28.44
   1  11   3  654.02   32.04
   1 -11   3  686.72   35.65
   1 -11   4   10.67    1.53
  -1 -11  -4   13.48    2.59
  -1 -11  -4   12.06    2.86
  -1  11  -4   16.05    2.28
   1  11   4    9.26    2.30
   1 -11   4   19.04    5.96
   1 -11   5  256.16   19.73
  -1 -11  -5  291.49   22.22
  -1 -11  -5  255.76   18.93
  -1  11  -5  264.52   19.97
   1  11   5  304.17   32.39
   1 -11   5  234.50   19.90
   1 -11   6   65.68    7.94
  -1 -11  -6   63.31    6.22
  -1 -11  -6   80.57    8.37
  -1  11  -6   61.92    6.09
   1  11   6   86.19    7.37
   1 -11   6   87.86   10.25
  -1 -11  -7  185.68   16.68
  -1 -11  -7  177.96   15.39
  -1  11  -7  179.78   16.17
   1  11   7  138.39   25.84
   1 -11   7  168.54   16.90
   1 -13  -7   63.21    7.52
   1 -13  -7   85.56   12.23
   1  13  -7   82.77    8.97
  -1  13   7   72.37   16.59
  -1 -13   7   73.46   10.39
   1 -13  -6   84.58    8.32
   1 -13  -6   74.08    6.77
   1  13  -6   71.19    7.11
  -1  13   6   68.29   17.78
  -1 -13   6   54.40    9.07
  -1 -13   5    9.87    4.20
   1 -13  -5   12.31    3.13
   1 -13  -5    7.74    1.60
   1  13  -5   16.98    3.14
  -1  13   5    5.53    2.54
  -1 -13   5   36.24    6.96
  -1 -13   4  145.66    7.12
   1 -13  -4  167.51    9.05
   1 -13  -4  122.59    6.74
   1  13  -4  127.90    6.63
  -1  13   4  125.00    7.30
  -1 -13   4  146.95   11.43
  -1 -13   3    8.71    1.90
   1 -13  -3    9.44    3.59
   1 -13  -3    1.80    1.18
   1  13  -3    4.69    1.28
  -1  13   3    3.59    1.99
  -1 -13   3    8.10    3.95
  -1 -13   2  147.33    8.57
   1 -13  -2  156.39    9.63
   1  13  -2  136.77    7.30
  -1  13   2  122.20    6.50
  -1  13   2  149.07    8.90
  -1 -13   2   98.05    8.06
  -1 -13   1  193.03   10.69
   1 -13  -1  158.38    9.51
   1  13  -1  175.08    8.86
   1  13  -1  207.79   10.32
  -1  13   1  195.89    9.77
  -1 -13   1  193.97   12.37
   1 -13  -1  212.42   13.16
   1 -13   0   20.26    2.88
  -1 -13   0   22.72    3.03
   1  13   0   10.81    2.51
   1  13   0   14.83    1.33
  -1  13   0   20.23    1.76
   1 -13   0   16.18    3.16
  -1 -13   0   11.98    3.28
   1 -13   1  289.61   15.51
  -1 -13  -1  265.86   14.42
   1  13   1  223.43   11.02
  -1  13  -1  259.87   13.06
   1  13   1  236.19   11.32
   1 -13   1  264.57   15.51
   1 -13   2 1397.22   66.42
  -1 -13  -2 1396.89   67.03
  -1  13  -2 1329.87   62.75
   1  13   2 1065.66   49.66
   1  13   2 1353.82   64.94
   1 -13   2 1175.24   58.00
   1 -13   3  107.35    6.93
  -1 -13  -3  105.84    7.75
  -1 -13  -3  109.44    6.61
  -1  13  -3   87.59    5.80
   1  13   3  116.12    8.09
   1 -13   3  126.27   10.45
   1 -13   4  529.65   37.95
  -1 -13  -4  531.36   38.97
  -1 -13  -4  504.53   35.84
  -1  13  -4  557.50   40.14
   1  13   4  538.65   39.17
   1 -13   4  451.44   34.76
   1 -13   5   84.31    8.13
  -1 -13  -5   72.02    6.89
  -1 -13  -5   86.81    6.50
  -1  13  -5   77.88    6.73
   1  13   5   78.98   15.17
   1 -13   5  110.13   11.02
  -1 -13  -6  100.28   10.21
  -1 -13  -6  105.53    9.77
  -1  13  -6   91.96    9.35
   1  13   6  133.94   25.65
   1 -13   6  134.46   15.09
  -1 -13  -7    8.35    4.05
  -1  13  -7    4.47    3.52
   1  13   7    9.73    2.99
   1 -13   7    7.25    3.93
   1 -15  -6  139.44   13.18
   1  15  -6  113.36   10.60
  -1  15   6  116.06   22.63
  -1 -15   6  126.11   14.85
   1 -15  -5    8.45    2.78
   1 -15  -5    3.08    1.68
   1  15  -5    7.84    2.72
  -1  15   5    7.32    2.35
  -1 -15   5    9.69    4.22
  -1 -15   4  180.26   14.94
   1 -15  -4  148.21   13.56
   1 -15  -4  181.04   14.79
   1  15  -4  161.61   13.52
  -1  15   4  157.52   14.39
  -1 -15   4  132.66   14.08
  -1 -15   3   13.41    2.23
   1 -15  -3   20.16    4.15
   1  15  -3    8.02    1.68
  -1  15   3    9.36    1.24
  -1  15   3   14.88    2.78
  -1 -15   3   10.59    4.25
  -1 -15   2   23.65    2.84
   1 -15  -2   37.55    4.28
   1  15  -2   37.46    2.60
  -1  15   2   30.79    2.13
  -1 -15   2   37.97    5.20
   1 -15  -2   32.26    4.62
   1 -15  -1  131.87    7.57
  -1 -15   1  107.71    6.61
   1  15  -1  132.72    5.79
  -1  15   1  143.29    6.16
  -1 -15   1  145.51    9.85
   1 -15  -1  131.91    8.79
   1 -15   0   82.80    5.84
  -1 -15   0   77.77    5.57
   1  15   0   84.81    3.94
  -1  15   0   71.66    3.79
   1 -15   0   86.39    7.05
  -1 -15   0   99.60    8.99
   1 -15   1   29.53    3.90
  -1 -15  -1   22.18    3.41
  -1  15  -1   31.39    2.57
   1  15   1   24.92    1.55
   1 -15   1   29.70    4.22
  -1 -15  -1   34.73    5.01
   1 -15   2    6.10    2.84
  -1 -15  -2    4.78    2.73
  -1  15  -2    0.73    1.26
   1  15   2    3.65    2.06
   1 -15   2    3.43    3.61
   1 -15   3   85.64    6.58
  -1 -15  -3   89.11    7.49
  -1  15  -3   67.37    5.45
   1  15   3   86.86    7.71
   1 -15   3   61.20    7.72
   1 -15   4  240.89   16.37
  -1 -15  -4  254.05   18.14
  -1  15  -4  227.82   15.96
   1  15   4  260.07   18.33
   1 -15   4  204.10   16.97
   1 -15   5   89.94   16.57
  -1 -15  -5   85.59    9.49
  -1  15  -5   87.95    8.86
   1  15   5   77.65   15.09
   1 -15   5  119.96   14.11
  -1 -15  -6  163.58   14.74
  -1  15  -6  152.63   13.75
   1  15   6  150.04   13.19
   1 -15   6  162.59   16.92
   1 -17  -5    4.50    3.38
  -1  17   5    4.93    3.13
  -1 -17   5    3.27    4.74
  -1 -17   4  153.37   13.78
   1 -17  -4  133.03   13.05
  -1  17   4  129.37   12.44
  -1 -17   4  144.34   16.04
  -1 -17   3   58.40    7.03
   1 -17  -3   50.36    6.79
  -1 -17   3   65.79   11.15
   1 -17  -3   66.44    8.62
  -1 -17   2   72.94    6.45
   1 -17  -2   58.42    6.25
  -1 -17   2   46.02    7.03
   1 -17  -2   51.39    6.24
  -1 -17   1   45.31    4.83
   1 -17  -1   56.06    5.64
  -1 -17   1   67.81    8.46
   1 -17  -1   57.39    6.70
   1 -17   0   38.05    4.59
  -1 -17   0   41.42    4.49
   1 -17   0   43.19    5.89
  -1 -17   0   39.99    6.08
   1 -17   1   31.29    3.89
  -1 -17  -1   20.20    3.43
  -1  17  -1   23.45    2.63
   1 -17   1   31.04    5.34
  -1 -17  -1   20.47    4.38
   1 -17   2   87.40    7.49
  -1 -17  -2   58.59    6.17
  -1  17  -2   61.77    5.20
   1 -17   2   63.86    8.04
  -1 -17  -2   61.80    7.34
   1 -17   3   36.29    4.79
  -1 -17  -3   32.74    5.49
  -1  17  -3   27.81    4.00
   1  17   3   43.01    6.12
   1 -17   3   26.89    5.60
   1 -17   4  262.89   22.23
  -1 -17  -4  255.28   22.44
  -1  17  -4  279.15   23.47
   1  17   4  264.54   24.96
   1 -17   4  254.69   23.98
  -1 -17  -5   69.40    8.04
  -1  17  -5   58.59    6.81
   1  17   5   39.13   20.31
   1 -17   5   62.98    8.80
  -1 -19   3   58.80    6.93
   1 -19  -3   89.84    9.87
  -1 -19   3   60.70    9.08
   1 -19  -3   62.63    8.59
  -1 -19   2  400.28   33.18
   1 -19  -2  452.06   88.32
  -1 -19   2  443.45   87.42
   1 -19  -2  439.64   86.40
  -1 -19   1   29.34    5.03
  -1 -19   1   14.42    4.99
   1 -19  -1   29.32    6.26
   1 -19   0   47.04    7.31
  -1 -19   0   38.79    6.14
   1 -19   0   60.41    8.06
   1 -19   1   87.76    9.43
  -1 -19  -1   85.04    9.11
  -1 -19  -1   82.58   10.66
   1 -19   2   82.91    8.49
  -1 -19  -2  103.04   11.17
   1 -19   2   83.14   11.32
  -1 -19  -2   89.84   10.71
   1 -19   3    3.03    2.37
  -1 -19  -3   17.46    4.16
   1 -19   3   13.76    5.60
  -1 -19  -3   14.50    5.30
   2   0  -9    8.18    3.70
  -2   0   9    4.31    2.68
   2   0  -8  248.42   20.72
  -2   0   8  247.19   20.81
   2   0  -7    0.28    1.05
   2   0  -7    4.07    2.88
  -2   0   7    3.89    2.39
   2   0  -6 2388.65   62.91
   2   0  -6 2580.29   68.08
   2   0  -6 2765.19   74.78
  -2   0   6 2766.05   75.31
   2   0  -5    0.46    0.53
   2   0  -5    0.74    1.16
   2   0  -5   -0.84    1.63
  -2   0   5    2.54    1.77
   2   0  -4 4893.31  107.26
   2   0  -4 4888.16  107.20
  -2   0   4 5222.48  116.61
   2   0  -3    1.28    0.53
  -2   0   3    1.96    0.77
  -2   0   3    4.56    1.50
  -2   0   3    2.20    1.55
   2   0  -3    4.02    2.61
  -2   0   1    0.14    0.40
   2   0  -1    0.47    0.70
  -2   0   1    0.80    0.60
  -2   0   1    2.59    0.87
   2   0   1    1.62    0.70
  -2   0  -1    2.17    1.12
  -2   0  -1    3.59    1.16
  -2   0  -1    3.95    1.50
   2   0   2 1102.87   22.34
  -2   0  -2 1127.43   23.37
  -2   0  -2 1127.89   23.72
  -2   0  -3    0.98    0.68
  -2   0  -3    3.28    1.11
   2   0   3    7.74    1.82
  -2   0  -4   47.01    2.80
  -2   0  -4   43.04    3.08
   2   0   4   38.31    3.08
  -2   0  -5   12.62    2.29
  -2   0  -5    4.67    1.86
   2   0   5    3.38    2.01
  -2   0  -6 1157.43   58.30
  -2   0  -6 1176.77   59.90
   2   0   6 1168.66   59.85
  -2   0  -7    3.02    2.03
  -2   0  -7    4.03    2.44
   2   0   7    4.31    3.40
  -2   0  -8    1.38    1.75
  -2   0  -8    7.08    4.69
   2   0   8    5.07    3.05
   2  -2  -9    6.98    2.92
   2   2  -9    6.48    2.95
  -2   2   9    4.23    2.37
  -2  -2   9    8.42    3.08
   2  -2  -8  437.73   34.27
   2  -2  -8  471.70   37.79
  -2   2   8  489.84   39.00
  -2  -2   8  427.19   34.71
   2  -2  -7  269.90   11.33
   2   2  -7  258.42   10.24
   2  -2  -7  279.11   12.98
  -2   2   7  227.33   10.88
  -2  -2   7  209.37   11.04
   2   2  -6 2043.61   54.23
   2  -2  -6 2172.93   58.08
   2   2  -6 2204.91   58.07
   2  -2  -6 2239.04   61.25
  -2   2   6 2147.14   58.94
  -2  -2   6 2104.20   58.88
   2   2  -5  197.81    7.86
   2  -2  -5  201.90    8.61
   2   2  -5  212.71    8.46
  -2   2   5  198.11    8.34
   2  -2  -5  223.02   10.07
  -2   2   5  209.87    9.59
  -2  -2   5  236.39   12.02
   2   2  -4  216.63    5.43
   2  -2  -4  227.42    6.52
   2   2  -4  223.53    5.63
  -2   2   4  232.85    6.42
   2  -2  -4  229.91    7.29
   2   2  -4  216.48    6.90
  -2   2   4  256.48    7.93
   2   2  -3  654.13   12.66
   2  -2  -3  592.22   12.63
  -2   2   3  636.81   13.33
   2   2  -3  566.02   11.04
   2  -2  -3  708.83   15.42
  -2  -2   3  598.30   13.16
  -2   2   3  684.03   14.80
   2  -2  -3  588.30   13.54
  -2  -2   3  576.99   14.49
   2   2  -3  597.51   14.58
   2  -2  -2 5078.14   96.52
  -2   2   2 4912.55   93.46
   2  -2  -2 4903.57   93.47
  -2   2   2 4719.41   89.65
   2  -2  -2 5092.93   96.92
   2  -2   1  436.67    9.62
  -2   2  -1  477.80   10.15
   2   2   1  436.74    9.47
   2   2   1  457.62    9.43
   2  -2   1  420.44    8.87
   2   2   1  491.74   10.71
  -2  -2  -1  467.87   10.26
   2  -2   1  450.92   10.56
  -2   2  -1  434.77   10.40
  -2   2  -2  503.28   11.30
   2   2   2  516.05   11.12
   2  -2   2  494.87   10.89
   2   2   2  524.49   11.93
  -2   2  -2  483.40   12.33
   2  -2   3 1602.11   36.76
  -2   2  -3 1379.64   32.56
  -2  -2  -3 1558.97   35.95
  -2  -2  -3 1502.19   34.81
  -2   2  -3 1511.11   35.26
   2   2   3 1447.15   34.02
   2  -2   3 1473.00   35.42
   2  -2   4   16.40    1.65
  -2  -2  -4   19.31    2.15
  -2  -2  -4   16.44    1.89
  -2   2  -4   15.02    1.97
   2   2   4    9.01    1.50
   2  -2   4   12.71    2.17
  -2  -2  -5   26.34    2.62
  -2   2  -5   31.16    2.40
  -2  -2  -5   25.09    2.52
  -2   2  -5   41.59    3.33
   2   2   5   33.28    3.32
   2  -2   5   30.43    3.25
  -2  -2  -6  143.16    8.84
  -2   2  -6  134.62    8.21
  -2  -2  -6  145.45    9.51
  -2   2  -6  136.73    9.16
   2   2   6  116.22    8.29
   2  -2   6  124.97    8.95
  -2  -2  -7   98.09    7.33
  -2   2  -7  105.22    7.47
  -2  -2  -7  119.72    9.30
  -2   2  -7   98.84    8.14
   2   2   7  112.81    8.99
   2  -2   7  114.94    9.54
  -2  -2  -8   45.07    6.80
  -2  -2  -8   53.07    6.60
  -2   2  -8   41.66    6.59
   2   2   8   57.70    7.05
   2  -2   8   53.83    7.08
   2  -4  -9  107.27   10.52
   2   4  -9  124.14   12.51
  -2   4   9  128.95   12.03
  -2  -4   9  119.30   12.35
   2  -4  -8   63.36    5.46
   2  -4  -8   45.05    4.94
   2   4  -8   54.17    5.80
  -2   4   8   50.46    5.12
  -2  -4   8   56.20    6.05
   2  -4  -7  306.58   12.94
   2  -4  -7  282.69   12.82
   2   4  -7  327.37   14.63
  -2   4   7  270.60   12.32
  -2  -4   7  320.28   15.65
   2   4  -6  362.20   17.25
   2  -4  -6  401.71   19.99
   2   4  -6  412.88   19.61
   2  -4  -6  329.78   17.19
   2   4  -6  365.11   18.91
  -2   4   6  374.95   19.09
  -2  -4   6  388.14   21.40
   2   4  -5  474.68   19.50
   2  -4  -5  431.13   18.67
   2   4  -5  470.33   19.31
   2  -4  -5  467.40   20.45
   2   4  -5  452.66   19.99
  -2   4   5  434.20   18.98
  -2  -4   5  487.09   22.82
  -2  -4   4  803.05   21.82
   2   4  -4  829.92   22.57
   2  -4  -4  788.46   22.72
   2  -4  -4  827.46   23.99
   2   4  -4  762.37   22.33
  -2   4   4  790.54   22.70
  -2  -4   3 1310.93   29.03
   2   4  -3 1312.52   29.10
   2  -4  -3 1371.88   31.72
  -2   4   3 1146.95   26.66
   2  -4  -3 1230.64   28.59
   2   4  -3 1279.14   29.64
  -2  -4   3 1279.25   29.44
  -2   4   3 1195.87   27.45
   2  -4  -3 1407.88   32.42
  -2  -4   3 1210.52   30.73
  -2  -4   2  358.81    7.50
   2   4  -2  333.01    7.00
   2  -4  -2  310.21    7.46
  -2   4   2  367.48    8.41
   2   4  -2  338.77    7.68
  -2  -4   2  360.21    7.97
  -2   4   2  370.46    8.04
   2  -4  -2  341.62    7.54
  -2  -4   2  382.34   10.59
   2  -4  -1 3555.55   68.42
  -2   4   1 3582.46   68.91
  -2  -4   1 3660.08   69.81
   2   4  -1 3742.24   71.30
   2  -4  -1 3698.00   70.76
   2   4  -1 3763.10   71.24
  -2  -4   1 3906.38   73.85
  -2  -4   1 3484.98   67.75
  -2   4   1 3769.80   71.76
   2  -4  -1 3377.53   64.22
  -2  -4   1 3768.89   73.80
   2  -4   0 6567.42  143.94
  -2  -4   0 5884.24  112.02
   2   4   0 6145.55  117.77
  -2  -4   0 6292.07  138.09
   2  -4   0 5571.57  106.53
  -2   4   0 5734.63  109.52
   2  -4   1  601.60   12.88
  -2   4  -1  565.26   12.26
  -2  -4  -1  575.59   12.69
  -2  -4  -1  612.01   12.36
   2   4   1  594.86   11.91
   2  -4   1  577.90   12.10
   2   4   1  596.32   13.14
   2  -4   1  604.59   14.23
  -2   4  -1  613.57   14.20
   2  -4   2 3301.13   73.29
  -2   4  -2 3277.54   72.71
  -2  -4  -2 3471.16   76.78
   2   4   2 3313.34   73.18
   2   4   2 3636.56   80.97
   2  -4   3  905.26   21.48
  -2  -4  -3  858.63   21.27
  -2  -4  -3  860.69   20.81
   2   4   3 1011.58   24.58
   2  -4   4  122.44    6.06
  -2  -4  -4  165.66    7.89
  -2  -4  -4  155.77    7.38
  -2   4  -4  142.04    7.10
   2   4   4  147.50    7.25
   2  -4   4  127.08    7.59
   2  -4   5  566.67   27.30
  -2  -4  -5  570.55   27.97
  -2  -4  -5  546.52   26.94
  -2   4  -5  586.60   29.01
   2   4   5  498.38   24.81
   2  -4   5  507.67   26.11
  -2  -4  -6  146.76    7.74
  -2   4  -6  173.96    8.03
  -2  -4  -6  154.92    8.10
  -2   4  -6  154.47    8.37
   2   4   6  148.24    7.92
   2  -4   6  131.56    8.47
  -2   4  -7  197.19   16.10
  -2  -4  -7  186.72   16.22
  -2   4  -7  202.81   17.34
   2   4   7  162.61   14.06
   2  -4   7  180.68   16.02
  -2  -4  -8  261.07   23.10
  -2  -4  -8  264.32   23.66
  -2   4  -8  286.71   25.59
   2   4   8  278.39   24.72
   2  -4   8  248.65   22.89
   2  -6  -9   37.42    8.48
   2   6  -9   36.09    8.38
  -2   6   9   29.48    7.05
  -2  -6   9   27.76    7.20
   2  -6  -8  127.23   10.34
   2  -6  -8  131.80   11.00
   2   6  -8  130.46   11.28
  -2   6   8  123.97   10.28
  -2  -6   8   99.10    9.93
   2  -6  -7  141.90   11.46
   2  -6  -7  157.62   12.54
   2   6  -7  158.60   12.89
  -2   6   7  127.84   10.31
  -2  -6   7  133.56   12.80
   2  -6  -6   74.53    5.43
   2   6  -6   75.02    4.09
   2  -6  -6   66.32    5.02
   2   6  -6   75.46    5.44
  -2   6   6   78.38    5.34
  -2  -6   6   87.33    8.02
   2   6  -5   34.11    2.07
   2  -6  -5   27.45    2.60
   2  -6  -5   25.81    2.56
   2   6  -5   24.67    2.66
  -2   6   5   31.85    2.67
  -2  -6   5   20.35    3.63
  -2  -6   4  138.51    5.67
   2   6  -4  154.45    6.33
   2  -6  -4  154.94    7.34
   2  -6  -4  155.65    7.21
   2   6  -4  156.49    7.28
  -2   6   4  168.15    7.46
  -2  -6   4  153.13    8.99
  -2  -6   3  833.86   19.18
   2  -6  -3  720.47   18.14
   2   6  -3  770.91   17.87
   2  -6  -3  705.20   17.88
   2   6  -3  701.85   17.16
  -2  -6   3  693.56   16.64
  -2   6   3  621.58   16.05
   2  -6  -3  708.89   17.24
  -2  -6   3  729.15   20.57
  -2  -6   2  976.01   22.41
   2  -6  -2  939.01   22.64
   2   6  -2  918.40   21.18
  -2   6   2  859.28   20.18
   2   6  -2  950.36   21.89
  -2  -6   2  964.20   22.01
  -2   6   2  907.80   21.27
   2  -6  -2  990.44   22.86
  -2   6   1 1318.63   27.02
  -2  -6   1 1146.57   23.29
   2   6  -1 1191.79   24.01
   2  -6  -1 1116.21   22.14
  -2   6   1 1088.64   21.86
   2   6  -1 1210.86   23.43
  -2  -6   1 1174.34   22.54
   2  -6  -1 1223.26   24.52
   2  -6  -1 1244.28   25.62
   2  -6   0 1896.32   37.91
  -2   6   0 1876.16   37.40
  -2  -6   0 1986.04   39.48
   2   6   0 1890.34   37.45
  -2   6   0 1843.58   35.78
  -2   6   0 1754.53   34.11
   2   6   0 1693.57   34.42
   2  -6   0 1775.38   36.12
  -2   6   0 1829.11   36.87
  -2   6  -1  125.54    4.37
  -2  -6  -1  158.38    5.40
  -2  -6  -1  138.44    3.68
   2   6   1  150.46    3.94
   2  -6   1  142.28    4.11
   2   6   1  164.37    5.57
   2  -6   1  186.01    7.30
  -2   6  -1  136.13    5.47
   2  -6   2  816.84   19.61
  -2  -6  -2  964.73   22.33
   2   6   2  789.69   18.42
  -2   6  -2  839.05   20.26
   2   6   2  847.10   20.89
   2  -6   2  791.64   21.44
   2  -6   3  400.25   12.33
  -2  -6  -3  360.42   11.94
  -2  -6  -3  329.34   10.42
  -2   6  -3  367.65   11.86
   2   6   3  371.71   12.10
   2  -6   3  350.71   13.46
   2  -6   4  228.86   10.39
  -2  -6  -4  224.28   10.93
  -2  -6  -4  243.71   11.31
  -2   6  -4  236.27   11.42
   2   6   4  299.91   13.85
   2  -6   4  294.75   15.06
   2  -6   5  519.83   25.31
  -2  -6  -5  467.60   23.65
  -2  -6  -5  451.72   22.72
  -2   6  -5  389.54   20.10
   2   6   5  460.15   23.26
   2  -6   6  111.12    8.84
  -2  -6  -6  102.30    8.77
  -2  -6  -6  101.22    8.82
  -2   6  -6   97.46    8.54
   2   6   6   98.36    8.58
   2  -6   6  118.23   10.81
  -2  -6  -7   15.76    2.96
  -2   6  -7   16.76    2.48
  -2  -6  -7   14.12    2.86
  -2   6  -7   13.19    3.50
   2   6   7   15.91    2.95
   2  -6   7   11.48    2.79
  -2  -6  -8   54.20    9.48
  -2  -6  -8   53.34    9.37
  -2   6  -8   52.63    9.45
   2   6   8   85.26    8.91
   2  -6   8   38.72    8.03
   2  -8  -8   93.96    9.15
   2  -8  -8   83.46    8.32
   2   8  -8   97.90    9.62
  -2   8   8   97.96    9.21
  -2  -8   8   91.75   10.40
   2  -8  -7   10.49    2.30
   2  -8  -7   15.35    2.64
   2   8  -7   12.78    2.57
  -2   8   7   12.14    2.16
  -2  -8   7   14.44    6.39
  -2  -8   6  106.07    4.59
   2  -8  -6   92.36    5.64
   2  -8  -6   90.76    5.42
   2   8  -6   84.06    5.44
  -2   8   6   95.91    5.44
  -2  -8   6  111.87    8.72
  -2  -8   5  255.58   12.39
   2   8  -5  256.44   12.53
   2  -8  -5  273.28   14.60
   2  -8  -5  312.75   15.98
   2   8  -5  262.51   13.82
  -2   8   5  271.19   13.95
  -2  -8   5  265.81   16.20
  -2  -8   4  321.35   13.61
   2  -8  -4  333.84   15.27
   2   8  -4  293.14   12.60
   2  -8  -4  333.45   14.75
   2   8  -4  315.33   14.17
  -2   8   4  311.32   13.92
  -2  -8   4  343.34   17.90
  -2  -8   3  675.01   19.27
   2  -8  -3  634.51   19.44
   2   8  -3  643.97   18.45
   2  -8  -3  653.70   19.34
   2   8  -3  691.88   20.01
  -2   8   3  659.78   19.38
  -2  -8   3  629.81   21.42
  -2  -8   2  623.34   17.99
   2  -8  -2  601.11   18.28
   2   8  -2  578.25   16.82
   2  -8  -2  727.74   20.70
   2   8  -2  615.27   17.45
  -2  -8   2  615.55   17.09
  -2   8   2  622.00   18.35
   2  -8  -2  648.29   18.59
  -2  -8   2  665.61   21.77
   2  -8  -1 2302.71   52.70
  -2  -8   1 2484.34   56.08
  -2   8   1 2224.40   49.85
   2   8  -1 2395.12   52.74
  -2  -8   1 2332.38   51.17
   2  -8  -1 2325.52   52.29
   2  -8  -1 2407.71   55.49
   2  -8   0 2672.95   60.63
  -2   8   0 2946.19   65.50
   2   8   0 2842.31   62.08
   2   8   0 3160.49   68.93
  -2   8   0 2897.80   64.20
   2   8   0 2790.59   63.91
   2  -8   0 2814.19   63.66
   2  -8   0 2584.08   59.64
   2  -8   1 1195.10   33.75
  -2  -8  -1 1146.24   32.77
  -2  -8  -1 1136.81   30.77
   2   8   1 1098.46   29.68
  -2   8  -1 1024.87   28.38
   2   8   1 1158.84   33.17
   2  -8   1 1062.16   31.60
   2  -8   2  211.85    7.55
  -2  -8  -2  176.06    7.05
  -2  -8  -2  211.56    6.68
   2   8   2  189.09    6.05
  -2   8  -2  203.93    7.20
   2   8   2  218.85    8.85
   2  -8   2  229.14   10.05
   2  -8   3   34.33    2.49
  -2  -8  -3   36.35    2.38
  -2   8  -3   41.36    3.43
   2   8   3   40.18    7.40
   2  -8   3   38.45    4.46
   2  -8   4  277.55   15.12
  -2  -8  -4  289.14   15.31
  -2  -8  -4  286.47   14.47
  -2   8  -4  300.52   15.66
   2   8   4  329.67   17.09
   2  -8   4  284.12   16.63
  -2  -8  -5    4.03    2.22
  -2   8  -5    7.65    2.64
   2   8   5    3.73    1.94
   2  -8   5    5.70    3.15
   2  -8   6  285.19   18.05
  -2  -8  -6  261.20   17.10
  -2  -8  -6  280.62   17.84
  -2   8  -6  303.14   19.66
   2   8   6  276.01   17.93
   2  -8   6  273.77   19.08
  -2  -8  -7   68.61    7.43
  -2  -8  -7   77.23    7.63
  -2   8  -7   71.48    7.71
   2   8   7   88.34    8.77
  -2  -8  -8   94.79   10.51
  -2  -8  -8   91.30    8.96
  -2   8  -8  102.88   10.16
   2   8   8   72.09    7.98
   2  -8   8   87.95    9.96
   2 -10  -8   54.89    9.57
   2 -10  -8   22.43   10.92
   2  10  -8   57.89   10.14
  -2  10   8   37.55   12.79
  -2 -10   8   62.52   12.03
   2 -10  -7  156.99   12.78
   2 -10  -7  145.89   12.62
   2  10  -7  149.29   12.25
  -2  10   7  175.43   15.25
  -2 -10   7  155.67   14.83
   2 -10  -6   20.54    3.17
   2 -10  -6   15.80    2.99
   2  10  -6   20.81    3.11
  -2  10   6   18.35    5.23
  -2 -10   6   18.06    4.27
  -2 -10   5  264.68   14.49
   2 -10  -5  310.36   17.34
   2 -10  -5  299.83   18.53
   2  10  -5  296.35   16.27
  -2  10   5  290.09   15.81
  -2 -10   5  257.80   17.45
  -2 -10   4  714.65   33.81
   2 -10  -4  634.95   31.23
   2 -10  -4  672.84   32.25
   2  10  -4  627.44   30.28
  -2  10   4  603.07   29.70
  -2 -10   4  657.60   34.74
  -2 -10   3  775.39   32.22
   2 -10  -3  681.59   29.43
   2 -10  -3  827.84   34.31
   2  10  -3  757.62   31.50
  -2  10   3  727.85   32.29
  -2 -10   2  124.38    6.09
   2 -10  -2  117.08    6.46
   2 -10  -2  152.51    6.81
   2  10  -2  131.80    5.77
  -2 -10   2  115.36    4.85
  -2  10   2  135.04    6.55
  -2 -10   2  116.62    7.58
   2 -10  -1  198.78    9.28
  -2 -10   1  199.14    8.97
   2  10  -1  160.60    6.26
   2  10  -1  201.73    7.92
  -2  10   1  179.94    7.43
  -2 -10   1  198.55   10.91
   2 -10  -1  197.52    9.72
   2 -10   0  187.20    8.79
  -2 -10   0  189.15    8.69
   2  10   0  195.41    7.49
   2  10   0  210.49    8.02
  -2  10   0  224.78    9.22
   2 -10   0  193.63    9.77
   2 -10   1  650.96   25.67
  -2 -10  -1  633.69   25.30
   2  10   1  622.13   23.21
  -2  10  -1  569.24   21.97
   2  10   1  647.50   23.99
   2  10   1  574.20   23.19
   2 -10   1  578.21   24.24
   2 -10   2  176.15    8.68
  -2 -10  -2  176.29    9.21
  -2 -10  -2  137.29    6.27
   2  10   2  134.60    6.16
  -2  10  -2  143.22    7.24
   2  10   2  196.37   23.16
   2 -10   2  141.99    9.11
   2 -10   3  527.57   15.98
  -2 -10  -3  537.53   17.50
  -2 -10  -3  464.23   14.45
  -2  10  -3  514.99   15.96
   2  10   3  544.26   17.88
   2 -10   3  508.48   18.80
   2 -10   4  460.06   23.70
  -2 -10  -4  509.55   25.93
  -2 -10  -4  511.13   24.81
  -2  10  -4  507.71   25.30
   2  10   4  506.90   25.57
   2 -10   4  537.27   29.26
   2 -10   5    9.54    2.49
  -2 -10  -5   23.25    3.55
  -2 -10  -5   13.36    2.02
  -2  10  -5   23.52    3.94
   2  10   5   15.80    5.27
   2 -10   5   23.30    5.74
   2 -10   6  292.30   19.33
  -2 -10  -6  284.60   20.04
  -2 -10  -6  317.77   21.08
  -2  10  -6  295.17   20.34
   2  10   6  264.46   33.40
   2 -10   6  254.28   19.37
  -2 -10  -7   53.92    6.63
  -2 -10  -7   40.77    5.81
  -2  10  -7   49.39    7.33
   2  10   7   42.78   12.19
   2 -10   7   37.53    7.27
   2 -12  -7   53.45    6.82
   2 -12  -7   47.32   17.34
   2  12  -7   62.20    7.04
  -2  12   7   53.09   17.68
  -2 -12   7   98.04   12.00
   2 -12  -6   91.44    8.06
   2 -12  -6   98.89   15.02
   2  12  -6   90.74    7.37
  -2  12   6   86.75   17.05
  -2 -12   6   94.49    9.91
  -2 -12   5  164.86   12.45
   2 -12  -5  170.53   13.64
   2 -12  -5  172.19   13.07
   2  12  -5  168.89   13.24
  -2  12   5  162.86   12.71
  -2 -12   5  170.64   15.84
  -2 -12   4   32.99    2.79
   2 -12  -4   25.02    3.66
   2 -12  -4   26.50    5.54
   2  12  -4   26.38    3.05
  -2  12   4   29.70    6.67
  -2 -12   3  571.26   27.65
   2 -12  -3  576.76   28.11
   2  12  -3  548.17   26.35
  -2  12   3  554.46   28.68
  -2 -12   3  617.29   32.71
  -2 -12   2  533.34   16.37
   2 -12  -2  471.06   15.53
   2  12  -2  514.86   14.70
  -2 -12   2  514.45   14.26
  -2  12   2  446.05   12.72
  -2 -12   2  532.58   19.38
   2 -12  -2  532.14   17.66
   2 -12  -1  510.42   16.44
  -2 -12   1  507.63   15.87
   2  12  -1  485.57   13.49
   2  12  -1  473.07   13.11
  -2  12   1  458.80   13.22
  -2 -12   1  543.75   20.06
   2 -12  -1  554.11   18.79
   2 -12   0  602.63   18.80
  -2 -12   0  642.03   19.67
   2  12   0  588.27   15.80
   2  12   0  660.98   17.66
  -2  12   0  609.03   17.23
   2 -12   0  554.00   18.81
  -2 -12   0  654.27   22.14
   2 -12   1 1201.74   34.21
  -2 -12  -1 1096.32   31.80
   2  12   1 1087.82   28.80
  -2  12  -1 1216.56   33.27
   2  12   1 1112.58   29.19
   2  12   1 1036.07   33.54
   2 -12   1  964.07   30.21
   2 -12   2  697.98   33.85
  -2 -12  -2  737.47   36.27
  -2 -12  -2  811.93   37.95
   2  12   2  614.58   28.90
  -2  12  -2  687.25   32.98
   2  12   2  697.53   35.22
   2 -12   2  736.34   37.83
   2 -12   3  221.38   12.55
  -2 -12  -3  211.81   12.66
  -2 -12  -3  218.01   11.59
  -2  12  -3  220.86   12.51
   2  12   3  232.34   26.43
   2 -12   3  236.79   15.26
   2 -12   4  964.05   56.50
  -2 -12  -4  894.35   64.03
  -2 -12  -4  990.22   57.76
  -2  12  -4  859.80   61.15
   2  12   4  966.42   57.27
   2 -12   4 1072.44   65.34
   2 -12   5  114.04   10.03
  -2 -12  -5  114.46   10.79
  -2 -12  -5  114.08    9.72
  -2  12  -5  113.94   10.31
   2  12   5  100.19   20.70
   2 -12   5  111.01   11.74
  -2 -12  -6   17.18    3.36
  -2 -12  -6    9.46    3.71
  -2  12  -6   14.85    3.75
   2  12   6   11.89    3.17
   2 -12   6   16.16    5.02
  -2 -12  -7  127.38   11.82
  -2  12  -7  127.03   11.79
   2  12   7  113.87   28.27
   2 -12   7  150.53   14.85
   2 -14  -7  197.69   17.04
   2 -14  -7  193.62   15.75
   2  14  -7  158.41   13.73
  -2  14   7  166.57   14.84
  -2 -14   7  178.28   17.90
   2 -14  -6    3.24    2.53
   2 -14  -6    2.19    1.62
   2  14  -6    3.56    2.72
  -2  14   6    6.41    1.74
   2 -14  -5  456.66   30.56
   2 -14  -5  537.88   52.52
   2  14  -5  446.93   29.11
  -2  14   5  464.11   30.34
  -2 -14   5  498.32   51.30
  -2 -14   4  105.88    7.51
   2 -14  -4  111.50    8.95
   2 -14  -4  116.91    9.30
   2  14  -4   96.04    6.82
  -2  14   4   86.01   12.49
  -2 -14   4  101.57   10.43
  -2 -14   3  227.60   10.12
   2 -14  -3  220.23   11.06
   2 -14  -3  196.58    8.21
   2  14  -3  207.95    8.90
  -2  14   3  209.24    9.94
  -2 -14   3  224.49   14.14
  -2 -14   2  182.13   10.74
   2 -14  -2  199.64   12.20
   2  14  -2  200.49   10.68
  -2  14   2  193.04   10.34
  -2 -14   2  180.43   12.76
   2 -14  -2  189.63   12.50
   2 -14  -1  199.62   11.66
  -2 -14   1  189.52   11.07
   2  14  -1  175.18    8.75
  -2  14   1  161.06    8.36
   2 -14  -1  179.03   11.56
  -2 -14   1  196.67   12.88
   2 -14   0  322.17   17.22
  -2 -14   0  341.51   18.12
   2  14   0  326.17   15.46
  -2  14   0  383.27   18.72
   2 -14   0  310.29   17.45
  -2 -14   0  371.95   21.17
   2 -14   1  163.16   10.13
  -2 -14  -1  165.88   10.39
  -2  14  -1  154.53    8.86
   2  14   1  128.40    6.62
   2  14   1  127.32    8.76
   2 -14   1  149.47   11.06
   2 -14   2  277.76   12.54
  -2 -14  -2  317.18   14.60
  -2  14  -2  271.18   11.45
   2  14   2  304.98   14.18
   2 -14   2  331.00   17.20
   2 -14   3  105.14    8.89
  -2 -14  -3  120.66   10.37
  -2  14  -3   98.90    8.09
   2  14   3   95.22   15.07
   2 -14   3  115.88   11.21
   2 -14   4  130.80   11.28
  -2 -14  -4  112.73   10.60
   2  14   4  123.52   16.85
   2 -14   4  118.39   12.39
   2 -14   5   91.52   10.75
  -2 -14  -5   96.22    9.83
  -2  14  -5  111.46   10.56
   2  14   5  113.95   16.31
   2 -14   5  101.53   12.15
  -2 -14  -6   15.12    4.80
  -2  14  -6    6.76    3.70
   2  14   6    2.93    3.59
   2 -14   6   14.60    5.97
   2 -16  -6  122.28   11.90
  -2  16   6  110.78   10.25
  -2 -16   6  113.46   12.84
   2 -16  -5   23.57    4.98
  -2  16   5    8.69    2.87
  -2 -16   5   10.68    5.40
  -2 -16   4    8.13    2.29
   2 -16  -4    5.08    2.77
   2 -16  -4    3.35    1.03
  -2  16   4    4.19    1.94
  -2 -16   4   12.67    5.98
  -2 -16   3   79.87    6.23
   2 -16  -3   75.62    6.69
  -2  16   3   81.85    5.81
  -2 -16   3   86.64    9.46
   2 -16  -3   83.08    7.52
  -2 -16   2   70.87    5.95
   2 -16  -2   80.86    7.20
  -2  16   2   71.43    4.86
  -2 -16   2   60.95    6.66
   2 -16  -2   82.06    8.12
   2 -16  -1   44.11    4.93
  -2 -16   1   53.02    5.40
  -2  16   1   52.37    3.96
   2 -16  -1   51.91    5.64
  -2 -16   1   57.99    6.80
   2 -16   0   80.27    6.98
  -2 -16   0   68.93    6.14
  -2  16   0   58.83    4.44
   2 -16   0   60.03    6.51
  -2 -16   0   70.52    8.74
   2 -16   1   97.93    8.18
  -2 -16  -1  100.11    8.13
  -2  16  -1   89.34    6.39
   2 -16   1   62.60    7.76
  -2 -16  -1   83.59    8.23
   2 -16   2   35.22    4.32
  -2 -16  -2   24.42    3.80
  -2  16  -2   31.95    3.13
   2  16   2   34.57    4.60
   2 -16   2   39.87    6.46
   2 -16   3  110.44    9.46
  -2 -16  -3  130.63   11.37
  -2  16  -3  112.76    8.49
   2  16   3  112.02    9.64
   2 -16   3   92.80    9.78
   2 -16   4   28.80    4.41
  -2 -16  -4   29.45    5.57
  -2  16  -4   26.36    4.88
   2  16   4   12.19    7.15
   2 -16   4    7.43    4.49
  -2 -16  -5  126.89   12.99
  -2  16  -5  131.80   12.90
   2  16   5  121.76   12.40
   2 -16   5  103.87   12.63
   2 -18  -4   15.52    5.58
  -2 -18   4   22.88    7.90
   2 -18  -4    5.47    3.17
  -2 -18   3   25.72    4.56
   2 -18  -3   26.18    5.88
  -2 -18   3   28.40    6.38
   2 -18  -3   26.89    5.54
  -2 -18   2   26.00    4.09
   2 -18  -2   54.62    7.27
  -2 -18   2   25.09    5.44
   2 -18  -2   29.32    5.47
   2 -18  -1  197.66   15.79
  -2 -18   1  200.02   15.77
  -2 -18   1  167.97   15.51
   2 -18  -1  204.95   17.20
   2 -18   0    6.79    2.51
  -2 -18   0    2.05    2.09
   2 -18   0    5.74    3.02
  -2 -18   0    3.77    3.22
   2 -18   1  185.54   16.28
  -2 -18  -1  184.34   16.34
   2 -18   1  163.49   16.03
  -2 -18  -1  184.98   17.76
   2 -18   2   50.72    6.10
  -2 -18  -2   33.33    5.75
   2 -18   2   40.99    8.62
  -2 -18  -2   20.81    5.23
   2 -18   3  139.07   12.83
  -2 -18  -3  132.01   12.80
   2  18   3  121.26   11.94
   2 -18   3  121.22   13.43
  -2 -18  -4   10.77    3.56
   2  18   4    6.13    2.30
   2 -18   4   13.03    6.28
  -2 -20   2  130.93   11.81
   2 -20  -2  127.86   12.12
  -2 -20   2  101.87   12.64
   2 -20  -2  120.35   13.14
   2 -20  -1  102.94   10.87
  -2 -20   1  117.61   11.93
  -2 -20   1  127.00   14.63
   2 -20  -1  107.52   11.96
   2 -20   0   24.57    5.85
  -2 -20   0   28.07    6.70
   2 -20   0   19.51    6.67
  -2 -20   0   37.05    9.24
   2 -20   1   48.54    6.22
  -2 -20  -1   64.05    7.24
   2 -20   1   49.73    8.01
  -2 -20  -1   66.25    9.28
   3  -1  -9   33.46    5.59
   3   1  -9   37.10    6.30
  -3   1   9   26.82    4.96
  -3  -1   9   34.51    6.00
   3  -1  -8   58.91    5.62
  -3   1   8   39.51    4.75
  -3  -1   8   46.31    5.24
   3  -1  -7  519.48   26.52
   3   1  -7  494.82   25.02
   3   1  -7  495.99   26.57
   3  -1  -7  535.66   28.74
  -3   1   7  495.49   26.73
  -3  -1   7  434.80   24.17
   3  -1  -6    8.72    1.19
   3   1  -6    5.26    1.04
   3  -1  -6   12.49    1.48
   3   1  -6   12.48    1.22
   3   1  -6    9.42    1.81
   3  -1  -6   15.05    2.30
  -3   1   6   12.35    2.29
  -3  -1   6   14.65    2.41
   3   1  -5 1306.21   48.26
   3  -1  -5 1290.20   48.00
   3   1  -5 1361.89   50.27
  -3   1   5 1238.02   46.01
   3  -1  -5 1062.29   40.70
  -3   1   5 1231.75   47.01
  -3  -1   5 1232.72   47.54
   3   1  -4 1813.33   39.93
   3  -1  -4 1799.33   40.25
   3   1  -4 1774.08   39.14
  -3   1   4 1547.85   34.73
  -3  -1   4 1659.52   39.83
   3  -1  -4 1625.15   38.96
  -3   1   3 6337.55  138.44
  -3   1   3 5876.48  112.50
  -3  -1   3 6558.76  144.14
  -3   1   3 6748.02  148.29
  -3  -1   3 6125.65  118.43
   3  -1  -3 6363.04  140.46
   3   1  -3 5973.04  115.30
   3   1  -2 9999.00  218.80
  -3  -1   0 3217.58   61.62
  -3   1   0 2808.30   53.84
  -3   1   0 2589.57   49.40
   3   1   0 2905.70   55.11
  -3  -1   0 2835.81   54.32
   3  -1   0 2809.04   53.60
   3   1   1 1145.29   23.10
   3  -1   1 1221.17   24.47
  -3   1  -1 1370.04   27.11
   3   1   1 1191.55   23.31
  -3  -1  -1 1223.20   24.78
   3  -1   2  970.85   20.29
  -3   1  -2  853.35   17.91
  -3   1  -2  979.58   20.51
   3   1   2  911.05   18.73
   3  -1   2 1021.90   20.87
   3   1   2  853.93   18.48
   3  -1   2  969.50   21.10
  -3   1  -2  840.91   19.08
   3  -1   3   55.10    2.99
  -3  -1  -3   60.22    3.10
  -3  -1  -3   56.45    3.02
  -3   1  -3   81.02    3.84
   3   1   3   78.60    4.41
   3  -1   3   58.12    3.48
  -3  -1  -4  125.50    6.34
  -3   1  -4  147.57    6.89
  -3  -1  -4  148.67    7.29
  -3   1  -4  147.88    7.31
   3   1   4  137.13    7.29
   3  -1   4  152.73    8.05
  -3  -1  -5  187.24   10.30
  -3   1  -5  219.39   11.63
  -3  -1  -5  185.69   10.50
  -3   1  -5  198.58   11.18
   3   1   5  181.16   10.88
   3  -1   5  156.81    9.57
  -3  -1  -6  329.15   14.08
  -3   1  -6  308.12   13.11
  -3  -1  -6  328.56   14.54
  -3   1  -6  333.66   15.04
   3   1   6  344.07   15.51
   3  -1   6  341.89   15.95
  -3  -1  -7  306.04   24.73
  -3   1  -7  304.84   24.58
  -3  -1  -7  301.85   24.98
  -3   1  -7  300.01   24.66
   3   1   7  297.07   24.52
   3  -1   7  275.82   23.04
  -3  -1  -8  206.82   17.86
  -3   1  -8  206.60   18.00
  -3  -1  -8  224.53   20.15
  -3   1  -8  181.06   16.53
   3   1   8  251.13   22.00
   3  -1   8  254.37   22.36
   3  -3  -9  226.39   20.33
   3   3  -9  245.86   22.16
  -3   3   9  224.00   20.18
  -3  -3   9  241.85   22.25
   3  -3  -8   71.47    5.52
   3  -3  -8   61.98    5.57
   3   3  -8   83.02    7.95
  -3   3   8   83.03    6.73
  -3  -3   8   86.50    7.91
   3  -3  -7  364.51   19.21
   3  -3  -7  402.69   21.97
   3   3  -7  401.07   22.14
  -3   3   7  401.99   21.87
  -3  -3   7  391.04   22.39
   3   3  -6  394.14   18.49
   3  -3  -6  388.67   19.14
   3   3  -6  402.31   18.89
   3  -3  -6  378.04   19.28
   3   3  -6  436.21   22.10
  -3   3   6  458.45   22.87
  -3  -3   6  433.98   23.10
   3   3  -5  595.85   22.03
   3  -3  -5  607.26   23.48
   3   3  -5  545.69   20.21
   3  -3  -5  590.25   23.46
   3   3  -5  611.04   24.31
  -3   3   5  599.69   23.61
  -3  -3   5  613.14   25.80
   3  -3  -4  155.43    5.08
  -3   3   4  155.53    4.90
   3  -3  -4  179.73    6.26
   3   3  -4  148.47    5.38
  -3   3   4  155.32    5.19
   3  -3  -4  151.36    5.83
   3  -3  -3  590.13   14.38
  -3   3   3  574.95   13.98
   3  -3  -3  662.20   16.19
   3   3  -3  694.66   16.92
  -3  -3   3  612.75   14.98
  -3   3   3  647.39   15.31
   3  -3  -3  618.25   15.28
   3   3  -3  604.38   16.36
   3  -3  -2 1040.17   21.13
  -3   3   2  926.24   18.94
  -3  -3   2  980.60   18.92
   3   3  -2  914.95   17.61
   3  -3  -2  974.11   19.93
   3   3  -2  958.40   19.31
  -3  -3   2  889.64   17.96
  -3   3   2  910.99   17.75
   3  -3  -2  955.13   18.83
  -3  -3   2 1079.98   23.49
  -3   3   1 2242.87   43.61
  -3  -3   1 2422.94   46.54
   3   3  -1 2500.27   47.89
  -3   3   1 2230.72   43.26
   3   3  -1 2500.34   47.54
  -3  -3   1 2316.36   44.12
   3   3  -1 2255.32   44.25
  -3  -3   1 2160.88   42.39
   3  -3  -1 2395.84   45.49
  -3   3   0  243.92    6.12
  -3  -3   0  215.29    5.36
  -3  -3   0  216.73    4.51
   3  -3   0  216.69    5.07
   3   3   0  215.63    4.42
  -3  -3   0  204.88    5.38
   3  -3   0  228.43    5.87
  -3   3   0  232.25    5.97
   3  -3   1  677.46   15.32
  -3  -3  -1  567.51   12.48
  -3  -3  -1  696.21   14.17
   3   3   1  670.12   13.49
   3  -3   1  705.83   14.64
   3  -3   1  688.75   15.51
  -3   3  -1  620.05   14.44
  -3   3  -2 2386.03   53.46
  -3  -3  -2 2281.39   51.14
   3   3   2 2125.66   47.47
   3  -3   2 2448.15   56.26
   3  -3   3  696.76   20.24
  -3  -3  -3  609.47   18.29
  -3  -3  -3  623.42   18.41
   3   3   3  584.69   17.72
   3  -3   3  648.16   20.23
   3  -3   4  342.52   16.50
  -3  -3  -4  403.31   17.90
  -3  -3  -4  397.65   17.63
  -3   3  -4  384.65   17.25
   3   3   4  394.86   17.76
  -3  -3  -5  630.54   30.89
  -3   3  -5  658.16   31.68
  -3  -3  -5  621.63   30.48
  -3   3  -5  682.91   33.51
   3   3   5  632.48   31.24
   3  -3   5  587.02   29.69
  -3  -3  -6  157.38    8.10
  -3   3  -6  136.85    6.95
  -3  -3  -6  147.37    8.56
  -3   3  -6  151.97    8.39
   3   3   6  131.75    7.61
   3  -3   6  156.86    9.29
  -3  -3  -7  139.90   10.49
  -3   3  -7  123.69    9.10
  -3  -3  -7  164.57   12.35
  -3   3  -7  130.70   10.47
   3   3   7  167.70   12.63
   3  -3   7  157.40   12.34
  -3  -3  -8    7.34    3.55
  -3   3  -8    7.38    3.13
   3   3   8   10.94    3.20
   3  -3   8    6.79    3.42
   3  -5  -9  150.53   13.76
   3   5  -9  169.00   15.58
  -3   5   9  157.13   14.27
  -3  -5   9  166.63   16.09
   3  -5  -8   37.05    3.95
   3  -5  -8   35.76    4.18
   3   5  -8   35.80    4.61
  -3   5   8   39.35    4.35
  -3  -5   8   39.72    5.49
   3  -5  -7  569.68   22.16
   3  -5  -7  609.19   24.29
   3   5  -7  638.12   25.60
  -3   5   7  567.99   22.54
  -3  -5   7  594.23   26.11
   3   5  -6  460.09   21.39
   3  -5  -6  414.59   20.61
   3   5  -6  439.65   20.43
   3  -5  -6  443.02   22.27
   3   5  -6  444.79   22.44
  -3   5   6  448.59   22.26
  -3  -5   6  504.16   26.94
   3   5  -5   69.46    3.03
   3  -5  -5   72.20    4.49
   3   5  -5   75.06    3.23
   3  -5  -5   88.28    5.20
   3   5  -5   65.68    4.29
  -3   5   5   77.49    4.43
  -3  -5   5   71.38    6.03
  -3  -5   4  207.89    5.95
   3  -5  -4  196.77    7.17
   3   5  -4  220.30    6.19
   3  -5  -4  199.76    7.38
   3   5  -4  207.39    7.44
  -3   5   4  225.00    7.42
   3  -5  -4  206.38    7.40
  -3  -5   4  236.70   10.83
  -3  -5   3  751.25   16.96
   3  -5  -3  662.07   16.51
   3   5  -3  650.75   14.75
   3   5  -3  641.11   15.67
  -3  -5   3  697.44   16.73
  -3   5   3  652.91   15.47
   3  -5  -3  629.81   15.24
  -3  -5   3  674.58   18.94
  -3  -5   2  143.15    3.73
   3   5  -2  149.71    3.80
   3  -5  -2  147.02    4.36
  -3   5   2  146.78    4.26
   3   5  -2  151.89    4.05
  -3  -5   2  151.80    3.91
  -3   5   2  137.04    3.84
   3  -5  -2  125.67    3.24
  -3  -5   2  127.52    5.52
   3  -5  -1  215.40    6.22
  -3   5   1  239.38    6.34
  -3  -5   1  230.84    5.80
   3   5  -1  222.20    5.47
   3  -5  -1  197.25    4.93
  -3   5   1  246.28    6.03
   3   5  -1  230.36    4.74
  -3  -5   1  225.66    4.65
  -3  -5   1  253.59    6.77
   3  -5  -1  200.92    4.95
   3  -5  -1  205.43    5.34
  -3  -5   1  242.37    7.47
   3  -5   0  295.92    7.63
  -3   5   0  250.35    6.62
  -3  -5   0  260.69    6.73
   3   5   0  224.09    5.86
  -3  -5   0  239.72    7.49
   3  -5   0  267.99    7.44
  -3   5   0  249.08    6.77
   3  -5   1 1112.19   26.00
  -3   5  -1  903.80   21.54
  -3  -5  -1  990.24   23.63
  -3  -5  -1 1015.39   22.86
   3   5   1 1058.96   23.67
   3   5   1 1132.84   26.88
   3  -5   1 1111.86   27.31
  -3   5  -1  951.25   23.51
   3  -5   2 2154.32   48.86
  -3  -5  -2 2254.46   51.55
  -3  -5  -2 1857.20   41.83
   3   5   2 1829.20   40.97
   3   5   2 2029.09   46.55
   3  -5   2 2005.00   47.65
   3  -5   3 1045.14   29.64
  -3  -5  -3 1050.46   30.35
  -3  -5  -3 1086.75   30.61
   3   5   3  973.45   28.24
   3  -5   3 1152.06   34.40
   3  -5   4  320.37   14.89
  -3  -5  -4  262.58   12.46
  -3  -5  -4  341.77   15.33
   3   5   4  314.65   14.58
   3  -5   4  344.25   16.76
   3  -5   5 1013.90   48.31
  -3  -5  -5  962.27   46.46
  -3  -5  -5  987.39   47.51
  -3   5  -5 1013.89   49.04
   3   5   5 1000.82   48.41
   3  -5   5 1058.33   51.90
  -3  -5  -6   85.35    7.74
  -3   5  -6   81.20    6.80
  -3  -5  -6   72.17    6.66
  -3   5  -6   88.25    8.13
   3   5   6   71.55    7.04
  -3  -5  -7   61.42    7.45
  -3   5  -7   48.33    5.89
  -3  -5  -7   48.88    6.73
  -3   5  -7   42.91    5.74
   3   5   7   67.77    8.20
   3  -5   7   55.61    7.67
  -3  -5  -8  120.66   12.09
  -3  -5  -8  177.19   17.08
  -3   5  -8  129.52   13.37
   3   5   8  153.99   14.94
   3  -5   8  139.42   14.44
   3  -7  -9  236.80   21.88
   3   7  -9  259.67   24.13
  -3   7   9  242.81   22.22
  -3  -7   9  218.67   21.53
   3  -7  -8  191.50   14.74
   3  -7  -8  201.97   15.69
   3   7  -8  186.39   14.97
  -3   7   8  217.37   16.62
  -3  -7   8  163.55   14.99
   3  -7  -7   90.74    6.83
   3  -7  -7   71.37    6.05
   3   7  -7  110.27    8.54
  -3   7   7   89.56    6.73
  -3  -7   7   97.25    9.62
   3  -7  -6  403.05   21.64
   3   7  -6  384.90   19.12
   3  -7  -6  440.59   23.43
   3   7  -6  412.68   22.16
  -3   7   6  441.15   23.16
  -3  -7   6  386.61   23.07
  -3  -7   5  194.02    5.89
   3  -7  -5  179.25    7.43
   3   7  -5  177.33    5.34
   3  -7  -5  182.88   20.92
   3   7  -5  180.62    7.24
  -3   7   5  194.51    7.08
  -3  -7   5  194.90   10.29
  -3  -7   4  321.01   12.26
   3  -7  -4  304.31   12.98
   3   7  -4  329.75   12.69
   3  -7  -4  309.12   14.29
   3   7  -4  307.70   12.79
  -3   7   4  325.81   13.14
  -3  -7   4  337.48   16.49
  -3  -7   3  616.45   17.36
   3  -7  -3  597.07   18.08
   3   7  -3  579.20   16.31
   3  -7  -3  628.31   19.71
   3   7  -3  588.38   17.09
  -3  -7   3  524.89   15.10
  -3   7   3  582.24   17.06
   3  -7  -3  578.45   16.66
  -3  -7   3  643.49   21.73
  -3  -7   2  359.05    9.32
   3   7  -2  372.40    9.50
   3  -7  -2  374.65    9.83
   3   7  -2  377.65    9.34
  -3  -7   2  378.21    9.16
  -3   7   2  370.13    9.64
   3  -7  -2  403.76   10.05
  -3  -7   2  348.92   11.78
  -3  -7   1  865.61   20.71
   3   7  -1  817.37   19.48
  -3   7   1  811.62   19.68
   3   7  -1  864.16   19.13
  -3  -7   1  864.23   18.99
   3  -7  -1  721.14   17.16
   3  -7  -1  854.44   20.92
   3  -7   0  773.90   19.21
  -3   7   0  676.46   16.12
   3   7   0  696.76   17.99
   3  -7   0  708.51   18.29
  -3   7   0  818.34   20.53
  -3  -7  -1   69.09    3.64
  -3  -7  -1   66.37    2.02
   3   7   1   61.45    1.92
  -3   7  -1   70.25    3.05
   3   7   1   80.60    5.07
   3  -7   1   67.73    4.08
   3  -7   2  132.11    5.30
  -3  -7  -2  105.40    5.01
  -3  -7  -2  120.79    4.29
   3   7   2  105.19    3.74
  -3   7  -2  106.40    4.59
   3   7   2  111.94    5.24
   3  -7   2   97.28    6.53
   3  -7   3    6.18    1.86
  -3  -7  -3    6.90    1.15
  -3   7  -3    6.27    1.45
   3   7   3   10.20    2.01
   3  -7   3    4.60    2.04
   3  -7   4  123.37   13.98
  -3  -7  -4  111.21    7.07
  -3  -7  -4  102.38    6.22
  -3   7  -4  123.63    7.57
   3   7   4  121.42    7.61
   3  -7   4   95.70    7.34
   3  -7   5  164.13    9.85
  -3  -7  -5  138.11    9.06
  -3  -7  -5  159.08    9.59
  -3   7  -5  133.81    8.66
   3   7   5  169.56   10.42
   3  -7   5  132.65    9.91
   3  -7   6  176.76   11.60
  -3  -7  -6  208.05   14.07
  -3  -7  -6  199.33   13.25
  -3   7  -6  196.53   13.53
   3   7   6  217.16   14.64
   3  -7   6  179.11   13.30
  -3  -7  -7  328.26   27.14
  -3   7  -7  315.42   25.49
  -3  -7  -7  312.40   25.71
  -3   7  -7  324.77   27.10
   3   7   7  390.99   32.07
   3  -7   7  336.86   28.62
  -3  -7  -8   27.94    4.96
  -3  -7  -8   22.09    4.92
   3   7   8   20.46    4.92
   3  -7   8   19.77    5.60
   3  -9  -8   96.66    9.88
   3  -9  -8   95.36    9.40
   3   9  -8  106.57   10.83
  -3   9   8   91.38    8.91
  -3  -9   8   92.27   10.75
   3  -9  -7   42.24    4.30
   3  -9  -7   47.96    9.97
   3   9  -7   49.49    4.88
  -3   9   7   52.90    4.68
  -3  -9   7   42.97    6.47
   3  -9  -6  384.50   16.39
   3  -9  -6  413.56   18.87
   3   9  -6  371.64   15.76
  -3   9   6  408.66   19.23
  -3  -9   6  358.23   18.82
  -3  -9   5  554.46   26.31
   3  -9  -5  559.73   28.07
   3  -9  -5  534.82   26.94
   3   9  -5  522.75   25.93
  -3   9   5  529.11   26.61
  -3  -9   5  619.81   33.21
  -3  -9   4  883.52   24.08
   3  -9  -4  870.36   25.68
   3   9  -4  829.93   22.80
   3  -9  -4  997.20   28.28
   3   9  -4  865.89   24.59
  -3   9   4  799.06   23.14
  -3  -9   4  888.41   29.59
  -3  -9   3 1182.12   44.25
   3  -9  -3 1207.50   46.25
   3   9  -3 1078.38   40.45
   3  -9  -3 1394.66   52.44
   3   9  -3 1198.20   44.86
  -3  -9   3 1072.92   39.98
  -3   9   3 1210.11   45.96
  -3  -9   3 1009.57   41.08
   3  -9  -2  322.44   13.70
  -3  -9   2  295.89   12.11
   3  -9  -2  330.41   10.52
   3   9  -2  289.76   11.30
  -3  -9   2  296.43   11.30
  -3   9   2  299.14   12.26
   3  -9  -2  290.22    9.09
  -3  -9   2  281.88   14.04
   3  -9  -1 1107.48   31.92
  -3  -9   1 1004.84   28.68
   3   9  -1 1078.39   28.86
   3   9  -1 1025.49   27.49
  -3   9   1 1128.45   31.26
   3  -9  -1  914.77   26.42
   3  -9  -1 1072.40   31.17
  -3  -9   1 1075.77   33.03
   3  -9   0  375.21   12.38
  -3  -9   0  369.78   12.18
  -3   9   0  314.77    9.64
   3   9   0  364.51   13.19
   3  -9   0  369.91   13.02
   3  -9   1   74.32    4.45
  -3  -9  -1   59.25    3.97
  -3  -9  -1   77.74    3.21
   3   9   1   69.29    2.85
  -3   9  -1   55.57    3.15
   3   9   1   98.29   14.52
   3  -9   1   55.98    4.69
   3  -9   2  200.82    9.62
  -3  -9  -2  173.27    8.87
  -3  -9  -2  164.12    7.62
   3   9   2  171.58    7.52
  -3   9  -2  190.95    9.13
   3   9   2  218.69   14.63
   3  -9   2  206.50   11.41
   3  -9   3  190.71    7.66
  -3  -9  -3  219.57    8.87
  -3  -9  -3  205.71    6.83
  -3   9  -3  217.76    8.06
   3   9   3  174.40    7.71
   3  -9   3  182.57    9.25
   3  -9   4  365.91   19.13
  -3  -9  -4  364.45   19.23
  -3  -9  -4  331.67   16.59
  -3   9  -4  382.01   19.56
   3   9   4  378.82   19.67
   3  -9   4  401.01   22.53
   3  -9   5  351.31   25.51
  -3  -9  -5  335.12   25.15
  -3  -9  -5  317.71   23.26
  -3   9  -5  360.38   26.72
   3   9   5  342.48   28.19
   3  -9   5  352.00   27.36
   3  -9   6    4.12    1.64
  -3  -9  -6   11.45    3.50
  -3  -9  -6    7.83    2.40
  -3   9  -6    5.49    2.44
   3   9   6    0.99    1.72
   3  -9   6    9.53    3.50
  -3  -9  -7    7.66    2.80
  -3  -9  -7    8.71    2.92
  -3   9  -7    5.13    2.96
   3   9   7    1.43    2.06
   3  -9   7    6.72    4.85
   3 -11  -8  130.80   13.13
   3 -11  -8   91.08   12.74
   3  11  -8  121.09   12.17
  -3  11   8   88.32   10.10
  -3 -11   8  112.27   13.88
   3 -11  -7    6.54    3.27
   3 -11  -7    4.52    1.87
   3  11  -7    1.82    1.92
  -3  11   7    3.50    1.66
  -3 -11   7    6.10    4.83
   3 -11  -6  116.59    8.88
   3 -11  -6  107.16   17.44
   3  11  -6  101.82    7.60
  -3  11   6   98.62   14.56
  -3 -11   6   84.50    9.10
  -3 -11   5  131.39    5.69
   3 -11  -5  129.78    7.34
   3 -11  -5  110.71    5.94
   3  11  -5  152.93    7.72
  -3  11   5  130.10   15.70
  -3 -11   5  124.94   10.31
  -3 -11   4  888.32   42.08
   3 -11  -4  928.40   45.20
   3 -11  -4 1025.15   48.78
   3  11  -4  909.93   43.42
  -3  11   4  892.81   43.21
  -3 -11   4  799.77   41.09
  -3 -11   3   84.68    3.97
   3 -11  -3   95.85    5.35
   3 -11  -3  112.13    5.14
   3  11  -3   99.31    4.20
  -3  11   3  103.80    5.18
  -3 -11   3   88.60    6.48
   3 -11  -2  112.34    6.54
  -3 -11   2  109.88    5.92
   3  11  -2  108.97    5.10
  -3 -11   2   83.52    3.82
  -3  11   2   87.52    4.39
   3 -11  -2  105.06    6.44
   3 -11  -1  231.30   11.39
  -3 -11   1  241.81   11.44
   3  11  -1  224.11    9.33
   3  11  -1  220.11    9.09
  -3  11   1  226.34   10.06
   3 -11  -1  236.92   11.94
  -3 -11   1  253.60   13.79
   3 -11   0  267.38   12.76
  -3 -11   0  233.70   11.39
  -3  11   0  256.61   11.35
   3  11   0  299.83   14.37
   3 -11   0  252.08   12.89
   3 -11   1  659.38   28.38
  -3 -11  -1  705.60   30.44
   3  11   1  603.43   24.30
  -3  11  -1  672.84   28.21
   3  11   1  586.01   23.55
   3  11   1  592.67   26.02
   3 -11   1  633.12   28.97
   3 -11   2  934.13   44.64
  -3 -11  -2  899.15   43.55
  -3 -11  -2  782.01   36.46
   3  11   2  772.46   36.00
  -3  11  -2  917.37   43.63
   3  11   2  807.54   40.53
   3 -11   2  779.20   39.16
   3 -11   3  311.19   16.19
  -3 -11  -3  323.11   17.31
  -3 -11  -3  278.06   14.07
  -3  11  -3  299.39   15.62
   3  11   3  324.33   21.00
   3 -11   3  268.14   16.21
   3 -11   4  124.47   16.39
  -3 -11  -4  129.16    7.55
  -3 -11  -4  118.45    5.61
  -3  11  -4  116.50    6.61
   3  11   4  121.50    7.25
   3 -11   4  109.24    8.36
   3 -11   5  353.91   28.15
  -3 -11  -5  367.73   29.94
  -3 -11  -5  361.82   28.47
  -3  11  -5  357.04   28.88
   3  11   5  364.79   29.44
   3 -11   5  363.35   30.43
   3 -11   6  189.89   15.85
  -3 -11  -6  188.57   16.74
  -3 -11  -6  178.02   14.91
  -3  11  -6  199.41   17.27
   3  11   6  141.66   12.83
  -3 -11  -7   23.20    5.17
  -3 -11  -7    9.86    2.84
  -3  11  -7    2.98    2.70
   3  11   7    4.05    2.19
   3 -11   7   11.63    4.88
   3 -13  -7  106.83   10.50
   3 -13  -7  121.16   11.07
   3  13  -7  125.23   11.60
  -3  13   7  109.05   10.18
  -3 -13   7  151.43   16.25
   3 -13  -6   39.61    5.89
   3 -13  -6   29.00   10.59
   3  13  -6   37.42    5.34
  -3  13   6   26.01    8.17
  -3 -13   6   29.26    6.44
   3 -13  -5  208.29   14.22
   3 -13  -5  220.87   14.17
   3  13  -5  184.43   12.11
  -3  13   5  201.27   13.15
  -3 -13   5  217.61   17.11
  -3 -13   4  102.46    5.50
   3 -13  -4  103.58    6.66
   3 -13  -4   93.78    5.10
   3  13  -4  106.15    5.59
  -3  13   4  100.85    6.38
  -3 -13   4   96.23    8.12
  -3 -13   3  138.32    8.23
   3 -13  -3  103.85    6.14
   3  13  -3  129.04    7.36
  -3  13   3  105.80    6.85
  -3 -13   3  131.81   10.57
   3 -13  -2 1263.88   60.71
  -3 -13   2 1284.06   60.96
   3  13  -2 1246.34   58.22
  -3  13   2 1398.11   65.65
  -3 -13   2 1190.41   59.16
   3 -13  -2 1161.47   56.31
   3 -13  -1  247.72   13.87
  -3 -13   1  269.54   14.36
   3  13  -1  229.86   10.90
   3  13  -1  251.10   11.81
  -3  13   1  254.11   12.74
   3 -13  -1  243.81   13.94
  -3 -13   1  296.89   17.73
   3 -13   0  792.53   38.66
  -3 -13   0  748.49   36.53
  -3  13   0  687.30   32.66
   3 -13   0  658.82   33.57
  -3 -13   0  689.93   35.18
   3 -13   1  672.94   33.24
  -3 -13  -1  704.98   34.96
  -3  13  -1  612.38   29.64
   3  13   1  633.59   32.00
   3 -13   1  637.73   33.24
   3 -13   2  135.57    8.74
  -3 -13  -2  132.01    8.88
  -3  13  -2  162.67    9.58
   3  13   2  103.97    5.37
   3  13   2  153.99   13.66
   3 -13   2  160.93   11.45
   3 -13   3   73.10    6.58
  -3 -13  -3   86.42    8.21
  -3 -13  -3   65.92    5.10
  -3  13  -3   59.50    5.49
   3  13   3   66.36   12.33
   3 -13   3   72.77    8.45
   3 -13   4  360.59   28.61
  -3 -13  -4  370.17   30.07
  -3  13  -4  357.89   28.65
   3  13   4  375.86   31.82
   3 -13   4  398.66   33.55
   3 -13   5  239.26   17.90
  -3 -13  -5  256.35   19.95
  -3  13  -5  201.21   16.15
   3  13   5  191.52   15.39
   3 -13   5  231.57   19.95
  -3 -13  -6   89.98   10.00
  -3  13  -6   96.76   10.19
   3  13   6   74.91   18.29
   3 -13   6  118.28   13.13
   3 -15  -6   22.06    4.94
   3 -15  -6   13.10    8.95
   3  15  -6   19.84    4.33
  -3  15   6   10.81    5.14
  -3 -15   6   25.83    7.24
   3 -15  -5   59.94    7.32
   3 -15  -5   76.10    7.11
   3  15  -5   83.17    7.23
  -3  15   5   62.46    9.49
  -3 -15   4  324.97   25.92
   3 -15  -4  274.37   22.75
   3 -15  -4  246.56   19.56
  -3  15   4  328.82   26.49
  -3 -15   4  308.36   27.27
  -3 -15   3   11.14    2.37
   3 -15  -3    4.91    2.63
  -3  15   3    5.40    1.31
  -3 -15   3   13.05    4.27
   3 -15  -3    7.86    3.59
  -3 -15   2  459.76   33.34
   3 -15  -2  439.64   32.43
  -3  15   2  438.45   31.24
  -3 -15   2  498.21   38.26
   3 -15  -2  480.79   35.95
   3 -15  -1  273.44   12.99
  -3 -15   1  253.28   11.97
  -3  15   1  299.48   12.10
   3 -15  -1  269.15   13.53
  -3 -15   1  296.10   16.34
   3 -15   0  194.97   10.19
  -3 -15   0  210.78   10.42
  -3  15   0  178.03    7.83
   3 -15   0  205.26   12.20
  -3 -15   0  230.07   13.23
   3 -15   1   12.21    3.93
  -3 -15  -1    8.59    2.65
  -3  15  -1    4.92    1.47
   3  15   1   14.47    3.85
   3 -15   1    5.17    3.24
   3 -15   2  114.55    8.50
  -3 -15  -2  141.77   10.54
  -3  15  -2  134.45    9.17
   3  15   2  114.04    9.42
   3 -15   2  122.81   10.76
   3 -15   3  384.69   25.40
  -3 -15  -3  339.68   23.32
  -3  15  -3  358.14   23.64
   3  15   3  381.75   25.95
   3 -15   3  384.24   27.49
   3 -15   4   94.18    8.78
  -3 -15  -4   99.84    9.98
  -3  15  -4  106.99    9.95
   3  15   4   88.64    9.16
   3 -15   4   98.64   11.13
   3 -15   5   30.11    9.44
  -3 -15  -5   38.94    7.72
  -3  15  -5   44.42    8.02
   3  15   5   42.16   10.82
   3 -15   5   24.32    5.90
   3 -17  -5    6.23    3.00
  -3 -17   5   11.22    5.45
   3 -17  -4  146.99   14.25
  -3 -17   4   95.61   11.85
   3 -17  -4  107.85   11.69
  -3 -17   3  111.76    9.36
   3 -17  -3   93.10    8.64
  -3  17   3  108.83    8.32
  -3 -17   3  103.47   11.32
   3 -17  -3   95.23    9.46
  -3 -17   2   38.26    4.25
   3 -17  -2   19.57    3.18
  -3  17   2   31.63    3.03
  -3 -17   2   38.36    5.87
   3 -17  -2   20.07    3.93
   3 -17  -1   20.23    3.69
  -3  17   1   10.07    1.69
   3 -17  -1   15.78    3.97
  -3 -17   1   25.31    5.09
   3 -17   0   62.84    6.22
  -3 -17   0   57.28    5.74
  -3  17   0   51.83    4.50
   3 -17   0   48.26    6.25
  -3 -17   0   69.65    8.32
   3 -17   1  163.29   12.36
  -3 -17  -1  139.07   11.05
  -3  17  -1  138.90    9.85
   3 -17   1  154.06   14.07
  -3 -17  -1  139.07   13.12
   3 -17   2   42.65    5.69
  -3 -17  -2   35.74    5.49
  -3  17  -2   40.55    5.25
   3  17   2   40.72    5.88
   3 -17   2   20.38    5.50
   3 -17   3   66.45    7.11
  -3 -17  -3   86.50    9.46
  -3  17  -3   48.15    6.73
   3  17   3   48.11    9.43
   3 -17   3   64.32    9.23
   3 -17   4  329.09   29.30
  -3 -17  -4  330.63   30.33
  -3  17  -4  353.53   31.56
   3  17   4  395.09   44.47
   3 -17   4  385.28   44.43
  -3 -19   3   19.06    5.01
   3 -19  -3   14.81    4.77
  -3 -19   3   36.65   10.38
   3 -19  -2    4.62    2.63
  -3 -19   2   19.71    6.36
   3 -19  -2    6.30    3.17
   3 -19  -1   35.91    5.73
  -3 -19   1   41.01    6.43
   3 -19  -1   19.64    5.03
  -3 -19   1   24.79    6.16
   3 -19   0   30.08    5.58
  -3 -19   0   16.58    3.88
   3 -19   0   10.73    3.96
  -3 -19   0   11.04    4.39
   3 -19   1    6.43    3.92
  -3 -19  -1    6.25    2.65
   3 -19   1   17.87    6.82
  -3 -19  -1    5.56    5.49
   3 -19   2   15.36    4.02
  -3 -19  -2   21.06    5.66
   3 -19   2   12.33    5.08
  -3 -19  -2   12.27    4.76
   4   0  -9    0.13    2.12
  -4   0   9    4.50    2.24
   4   0  -8  172.01   12.08
  -4   0   8  182.42   12.84
   4   0  -7    0.46    0.88
   4   0  -7    5.56    2.35
  -4   0   7    2.02    2.39
   4   0  -6  176.51    5.57
   4   0  -6  208.22    6.56
   4   0  -6  181.16    7.85
  -4   0   6  213.49    8.83
   4   0  -5    1.95    0.70
  -4   0   5    0.69    0.63
   4   0  -5    4.06    2.45
  -4   0   5   11.69    3.02
   4   0  -4 2281.83   50.32
  -4   0   4 2373.12   52.30
  -4   0   4 2444.32   56.38
   4   0  -4 2000.49   46.74
   4   0  -3    0.87    0.49
  -4   0   3    2.12    0.37
   4   0  -3    1.00    1.19
  -4   0   3    1.57    1.39
  -4   0   3    5.19    2.61
   4   0  -2   36.79    1.39
  -4   0   2   35.06    1.40
   4   0  -2   29.58    1.66
  -4   0   2   29.03    1.52
  -4   0   2   36.77    1.87
   4   0  -2   38.91    1.97
   4   0  -1    1.42    0.76
  -4   0   1    0.99    0.38
   4   0  -1    1.72    0.71
  -4   0   1    0.88    0.30
  -4   0   0 5324.43  101.66
  -4   0   0 5532.00  104.79
   4   0   0 5414.84  102.85
  -4   0   0 5662.03  107.58
   4   0   1    1.50    0.57
  -4   0  -1    4.50    1.39
   4   0   1    1.81    0.94
   4   0   1    1.29    1.05
   4   0   2 8057.69  214.87
  -4   0  -3    6.38    1.89
  -4   0  -3    5.48    2.33
  -4   0  -4   43.27    3.18
  -4   0  -4   38.91    3.17
   4   0   4   45.54    3.74
  -4   0  -5    1.98    1.50
  -4   0  -5    1.71    1.94
   4   0   5    3.65    2.65
  -4   0  -6  871.56   61.95
  -4   0  -6 1030.98   61.06
   4   0   6  945.75   67.71
  -4   0  -7    1.99    2.15
  -4   0  -7    3.15    2.10
   4   0   7    6.00    3.20
  -4   0  -8  249.48   22.80
  -4   0  -8  258.89   24.07
   4   0   8  256.84   23.99
   4  -2  -9   31.57    5.32
   4   2  -9   32.34    5.38
  -4   2   9   43.74    7.08
  -4  -2   9   47.61    7.68
   4  -2  -8  174.00   12.07
   4   2  -8  184.78   12.99
  -4   2   8  188.03   12.77
  -4  -2   8  140.71   10.83
   4  -2  -7  512.27   26.21
   4  -2  -7  484.55   25.99
   4   2  -7  521.65   27.79
  -4   2   7  502.28   26.70
  -4  -2   7  506.40   27.77
   4   2  -6 1697.99   44.07
   4   2  -6 1692.94   44.00
   4  -2  -6 1732.54   46.38
  -4   2   6 1522.47   40.79
   4  -2  -6 1498.34   41.93
   4   2  -6 1809.10   50.01
  -4   2   6 1797.74   49.50
  -4  -2   6 1790.12   51.02
   4  -2  -5  173.54    7.45
  -4   2   5  138.63    5.98
   4  -2  -5  169.41    8.10
   4   2  -5  160.22    7.76
  -4   2   5  161.02    7.57
  -4  -2   5  172.53    9.16
   4  -2  -4 2042.31   45.79
  -4   2   4 1807.69   40.63
   4   2  -4 2085.58   47.71
  -4   2   4 1910.14   43.55
   4  -2  -4 2045.68   47.44
   4  -2  -3  660.97   15.69
  -4   2   3  636.90   15.09
   4   2  -3  676.90   16.42
  -4  -2   3  674.43   16.38
  -4   2   3  621.93   14.74
   4  -2  -3  695.46   17.05
  -4  -2   3  651.20   17.67
   4   2  -3  613.50   16.15
  -4  -2   2  188.91    4.21
   4  -2  -2  149.42    4.23
  -4   2   2  162.54    4.37
  -4  -2   2  180.84    4.03
  -4   2   2  178.93    5.06
   4   2  -2  171.36    4.41
  -4  -2   2  177.47    4.61
  -4   2   2  184.33    3.99
  -4  -2   2  205.04    6.23
   4  -2  -2  163.14    3.76
  -4  -2   1  390.04    8.41
  -4   2   1  401.19    9.02
   4   2  -1  390.61    8.19
  -4  -2   1  380.59    8.06
   4   2  -1  382.48    8.73
  -4  -2   1  350.34    8.15
   4  -2  -1  351.15    6.93
  -4   2   1  363.26    7.31
  -4  -2   0 2980.80   57.52
  -4   2   0 3519.29   67.67
  -4  -2   0 3141.45   60.55
  -4  -2   0 3209.57   61.03
  -4   2   0 3495.98   66.88
   4   2   0 2943.26   55.98
   4  -2   0 3081.23   59.09
  -4   2   0 3112.94   60.08
  -4  -2  -1  588.35   12.91
  -4  -2  -1  588.08   13.04
  -4  -2  -1  564.41   11.96
  -4   2  -1  552.83   12.07
   4   2   1  502.80   10.47
   4   2   1  544.98   12.27
  -4  -2  -1  456.37   10.60
   4  -2   1  534.07   12.20
  -4   2  -1  501.81   11.98
   4  -2   2  204.61    6.39
  -4  -2  -2  182.67    5.60
  -4   2  -2  183.64    5.91
   4   2   2  157.86    4.79
   4  -2   2  194.45    6.78
   4  -2   3  592.31   17.76
  -4  -2  -3  510.78   15.81
  -4  -2  -3  517.00   15.81
  -4   2  -3  484.12   15.02
   4   2   3  487.41   15.43
   4  -2   3  463.27   15.22
   4  -2   4  362.35   16.12
  -4  -2  -4  395.27   17.60
  -4  -2  -4  392.33   17.52
  -4   2  -4  405.65   18.22
   4   2   4  339.93   15.73
   4  -2   4  380.28   17.85
  -4  -2  -5   96.76    6.36
  -4   2  -5   99.21    6.22
  -4  -2  -5   89.65    6.12
  -4   2  -5  102.43    6.93
   4   2   5   96.58    6.92
  -4  -2  -6   78.18    7.26
  -4   2  -6   75.50    6.65
  -4  -2  -6   83.10    7.76
  -4   2  -6   92.08    8.71
   4   2   6   76.83    7.37
   4  -2   6   83.33    8.12
  -4  -2  -7   33.94    5.36
  -4   2  -7   23.99    3.85
  -4  -2  -7   28.43    4.58
  -4   2  -7   43.74    6.04
   4   2   7   34.52    5.57
   4  -2   7   30.88    4.79
  -4  -2  -8  119.98   12.02
  -4   2  -8  129.71   12.80
  -4  -2  -8  115.53   11.86
  -4   2  -8  156.57   15.52
   4   2   8  132.37   13.34
   4  -2   8  133.96   14.48
   4  -4  -9   47.42    7.03
   4   4  -9   57.82    6.95
  -4   4   9   38.88    5.79
  -4  -4   9   56.28    7.94
   4  -4  -8   41.52    3.74
   4  -4  -8   44.64    4.64
   4   4  -8   44.29    4.92
  -4   4   8   52.33    4.79
  -4  -4   8   53.73    5.82
   4  -4  -7  352.86   14.34
   4  -4  -7  321.59   14.19
   4   4  -7  392.51   16.88
  -4   4   7  379.37   15.71
  -4  -4   7  345.05   16.85
   4  -4  -6  359.21   17.82
   4  -4  -6  363.81   18.61
   4   4  -6  379.36   19.43
  -4   4   6  374.91   18.76
  -4  -4   6  366.47   20.22
   4  -4  -5  208.90    9.77
   4  -4  -5  208.41   10.10
   4   4  -5  187.94    8.83
  -4   4   5  194.96    8.54
  -4  -4   5  196.87   11.22
   4  -4  -4 1347.44   37.36
   4  -4  -4 1167.98   34.63
   4   4  -4 1330.31   37.23
  -4   4   4 1339.17   36.79
   4  -4  -4 1353.64   38.06
  -4  -4   4 1437.65   42.64
  -4  -4   3  199.25    4.71
   4  -4  -3  206.81    6.31
  -4  -4   3  188.81    4.40
  -4   4   3  196.20    5.95
   4  -4  -3  223.96    6.72
   4   4  -3  196.03    5.95
  -4  -4   3  211.01    6.10
  -4   4   3  205.57    5.38
   4  -4  -3  202.51    5.85
   4  -4  -2  193.24    5.57
  -4   4   2  157.92    4.70
  -4  -4   2  180.19    4.33
   4   4  -2  170.92    4.04
   4  -4  -2  182.94    6.79
   4   4  -2  192.42    4.72
  -4  -4   2  182.11    4.59
  -4   4   2  182.38    4.01
   4  -4  -2  173.55    3.77
  -4  -4   2  218.05    7.52
  -4   4   1 1417.61   28.64
  -4  -4   1 1275.10   25.52
   4   4  -1 1270.92   25.17
   4   4  -1 1416.05   27.17
  -4  -4   1 1259.55   24.30
   4   4  -1 1395.71   28.62
  -4  -4   1 1216.67   24.99
   4  -4  -1 1244.52   24.28
   4  -4   0   21.53    1.53
  -4   4   0   15.52    1.29
  -4  -4   0   19.66    1.58
   4   4   0   19.93    1.45
  -4  -4   0   21.10    0.87
  -4   4   0   23.79    1.55
   4   4   0   19.32    0.69
   4  -4   0   16.63    0.94
  -4  -4   0   21.90    4.03
   4  -4   0   20.06    1.55
  -4   4   0   22.74    2.19
   4  -4   1  196.96    6.21
  -4  -4  -1  208.78    6.42
  -4  -4  -1  239.18    6.24
   4   4   1  209.31    5.30
   4   4   1  244.32    7.46
   4  -4   1  211.65    6.84
  -4   4  -1  211.81    7.27
  -4  -4  -2  368.97   10.56
  -4  -4  -2  375.28    9.84
  -4   4  -2  407.07   11.10
   4   4   2  397.96    9.97
   4   4   2  395.06   11.07
   4  -4   2  351.29   10.77
   4  -4   3  115.28    6.38
  -4  -4  -3  122.88    6.34
  -4  -4  -3  107.80    5.36
  -4   4  -3  111.17    5.89
   4   4   3  125.51    6.39
   4  -4   3  108.92    6.18
   4  -4   4   20.20    5.17
  -4  -4  -4   16.69    2.28
  -4  -4  -4   21.75    2.26
  -4   4  -4   13.90    1.80
   4   4   4   19.15    2.42
   4  -4   4   17.69    2.85
   4  -4   5   23.61    2.77
  -4  -4  -5   16.51    2.43
  -4  -4  -5   20.28    2.70
  -4   4  -5   17.81    2.72
   4   4   5   16.65    2.69
   4  -4   5    9.09    2.53
  -4  -4  -6  188.26   12.71
  -4   4  -6  207.64   13.39
  -4  -4  -6  170.26   11.87
  -4   4  -6  191.08   13.34
   4   4   6  224.27   15.21
  -4  -4  -7   10.96    2.65
  -4  -4  -7   16.67    3.44
  -4   4  -7   18.48    4.01
   4   4   7   18.74    3.92
   4  -4   7   16.22    3.83
  -4  -4  -8  161.36   14.06
  -4  -4  -8  173.95   15.16
  -4   4  -8  202.60   17.97
   4   4   8  177.90   15.71
   4  -4   8  175.10   16.06
   4  -6  -9    8.71    2.98
   4   6  -9   11.01    4.09
  -4   6   9    5.68    1.89
  -4  -6   9   25.98    6.16
   4  -6  -8  112.26    8.45
   4  -6  -8  111.18    8.97
   4   6  -8  122.29    9.85
  -4   6   8  122.37    9.24
  -4  -6   8  142.96   12.56
   4  -6  -7   45.65    4.46
   4  -6  -7   47.24    4.85
   4   6  -7   59.39    5.87
  -4   6   7   44.56    4.28
  -4  -6   7   64.13    7.97
   4  -6  -6  186.34   10.35
   4  -6  -6  170.38   16.05
   4   6  -6  190.74   10.82
  -4   6   6  189.62   10.15
  -4  -6   6  191.38   12.75
   4  -6  -5  344.41   15.40
   4  -6  -5  338.98   19.80
   4   6  -5  338.62   15.33
  -4   6   5  329.27   14.41
  -4  -6   5  278.86   15.17
  -4  -6   4  540.75   19.95
   4  -6  -4  541.78   21.42
   4   6  -4  519.32   19.16
   4  -6  -4  518.75   20.58
   4   6  -4  555.96   21.77
  -4   6   4  577.80   22.09
   4  -6  -4  516.13   20.22
  -4  -6   4  569.92   24.93
   4  -6  -3  103.34    4.59
  -4  -6   3  122.81    3.98
   4   6  -3  112.66    3.66
   4   6  -3  127.08    4.70
  -4  -6   3  105.53    3.97
  -4   6   3  120.63    4.21
   4  -6  -3  117.26    4.19
  -4  -6   2 1376.49   31.25
   4   6  -2 1336.85   30.19
   4   6  -2 1403.47   31.41
  -4  -6   2 1360.24   30.45
   4  -6  -2 1404.77   31.28
  -4  -6   2 1503.67   37.28
   4  -6  -2 1274.48   29.00
   4  -6  -1 2453.07   55.68
  -4  -6   1 2474.95   55.51
   4   6  -1 2321.47   51.91
   4   6  -1 2325.12   50.62
  -4  -6   1 2637.92   57.46
   4  -6  -1 2288.63   50.80
   4  -6  -1 2576.70   57.66
   4  -6   0  961.63   23.17
   4  -6   0  905.40   22.25
  -4   6   0  926.73   22.53
   4  -6   1  294.70    8.57
  -4  -6  -1  340.64    9.85
  -4  -6  -1  327.49    8.00
   4   6   1  297.21    7.06
   4   6   1  304.50    9.17
   4  -6   1  362.12   11.17
  -4   6  -1  330.21   10.31
   4  -6   2  512.11   15.74
  -4  -6  -2  483.43   15.30
  -4  -6  -2  472.33   13.82
   4   6   2  486.42   13.95
  -4   6  -2  454.56   14.01
   4   6   2  498.68   16.62
   4  -6   2  434.55   14.86
   4  -6   3  143.98   15.45
  -4  -6  -3  131.41    6.61
  -4   6  -3  134.46    7.03
   4   6   3  117.38    6.51
   4  -6   3  130.28    7.71
   4  -6   4   24.50    3.50
  -4  -6  -4   23.19    2.88
  -4  -6  -4   20.84    2.23
   4   6   4   17.64    2.66
   4  -6   4   16.46    3.13
   4  -6   5  121.58    7.44
  -4  -6  -5  120.82    6.95
  -4  -6  -5  142.54    7.29
   4   6   5  105.11    6.37
   4  -6   5  122.13    7.79
   4  -6   6  396.51   31.41
  -4  -6  -6  409.01   32.86
  -4  -6  -6  393.02   31.36
   4   6   6  330.87   26.88
   4  -6   6  350.83   29.01
  -4  -6  -7    1.05    2.07
  -4   6  -7    6.66    2.81
  -4  -6  -7    1.74    2.25
  -4   6  -7    9.09    3.84
   4   6   7    7.29    2.78
   4  -6   7    0.15    2.65
   4  -8  -9   36.61   11.97
   4   8  -9   43.84    6.81
  -4   8   9   43.08    6.04
  -4  -8   9   52.34    8.06
   4  -8  -8  293.53   24.15
   4  -8  -8  281.79   23.39
   4   8  -8  294.77   24.64
  -4   8   8  271.40   22.31
  -4  -8   8  313.16   27.54
   4  -8  -7   29.35    3.35
   4  -8  -7   20.25    4.75
   4   8  -7   33.99    3.88
  -4   8   7   34.54    3.37
  -4  -8   7   33.39    5.35
   4  -8  -6  279.52   15.66
   4  -8  -6  245.62   14.90
   4   8  -6  268.98   15.06
  -4   8   6  245.52   13.49
  -4  -8   6  279.07   18.14
  -4  -8   5   19.58    1.60
   4  -8  -5   19.62    2.83
   4   8  -5   20.82    1.34
   4  -8  -5   36.07    5.41
   4   8  -5   32.13    2.95
  -4   8   5   28.27    4.89
  -4  -8   5   22.98    4.83
  -4  -8   4   46.09    2.51
   4  -8  -4   33.88    2.99
   4   8  -4   35.51    2.06
   4  -8  -4   51.91    6.86
   4   8  -4   37.26    2.74
  -4   8   4   47.34    3.16
   4  -8  -4   38.93    2.91
  -4  -8   4   53.40    5.22
   4  -8  -3  428.91   17.61
  -4  -8   3  417.29   16.12
   4   8  -3  413.12   15.95
   4  -8  -3  437.53   17.48
   4   8  -3  458.04   17.79
  -4  -8   3  380.76   14.73
  -4   8   3  403.83   15.76
   4  -8  -3  376.62   14.67
  -4  -8   3  387.04   17.52
  -4  -8   2  259.47    8.36
   4   8  -2  223.29    7.39
   4  -8  -2  265.03    8.91
   4   8  -2  232.35    6.90
  -4  -8   2  254.93    7.38
   4  -8  -2  214.04    6.71
  -4  -8   2  228.18   10.31
   4  -8  -2  256.49    8.78
   4  -8  -1  424.58   13.74
  -4  -8   1  430.41   13.30
  -4   8   1  437.36   13.10
   4  -8  -1  419.73   13.00
   4  -8  -1  431.38   13.47
  -4  -8   1  479.16   16.56
   4  -8   0  439.01   14.13
  -4  -8   0  455.06   14.35
  -4   8   0  472.86   13.91
   4   8   0  495.69   15.88
   4  -8   0  527.05   17.05
  -4   8   0  505.51   15.93
   4  -8   1  876.66   25.57
  -4  -8  -1  863.48   25.43
  -4  -8  -1  751.40   20.34
   4   8   1  788.27   21.20
  -4   8  -1  680.73   19.68
   4   8   1  744.33   22.80
   4  -8   1  778.84   24.20
   4  -8   2  177.25    8.75
  -4  -8  -2  184.07    9.37
  -4  -8  -2  189.91    8.37
   4   8   2  183.00    8.00
  -4   8  -2  206.80    9.76
   4   8   2  188.00   11.24
   4  -8   2  178.83   10.00
   4  -8   3  180.43   17.63
  -4  -8  -3  141.77    6.55
  -4  -8  -3  136.15    5.18
  -4   8  -3  142.86    6.36
   4   8   3  147.97    6.63
   4  -8   3  143.61    7.99
   4  -8   4  699.61   34.00
  -4  -8  -4  607.80   30.40
  -4  -8  -4  616.87   29.91
  -4   8  -4  646.83   31.91
   4   8   4  685.74   33.94
   4  -8   4  595.53   30.61
   4  -8   5   82.17    8.02
  -4  -8  -5   98.46    8.71
  -4  -8  -5  110.62    9.09
  -4   8  -5   99.10    8.78
   4   8   5   97.95    8.63
   4  -8   5   92.07    8.88
   4  -8   6  122.15    9.32
  -4  -8  -6  131.47   10.36
  -4  -8  -6  136.65   10.26
  -4   8  -6  143.29   11.47
   4   8   6  130.63   10.36
   4  -8   6   98.68    9.08
  -4  -8  -7   86.12    8.99
  -4  -8  -7   96.24    9.49
  -4   8  -7   78.40    8.63
   4   8   7   78.66    8.31
   4  -8   7   77.13    9.30
   4 -10  -8  213.61   18.56
   4 -10  -8  209.59   18.15
   4  10  -8  251.40   22.04
  -4  10   8  256.22   21.50
  -4 -10   8  225.13   21.82
   4 -10  -7  369.43   24.78
   4 -10  -7  376.09   25.66
   4  10  -7  412.34   27.39
  -4  10   7  382.74   25.07
  -4 -10   7  340.77   25.15
   4 -10  -6   70.84    6.63
   4 -10  -6   48.00   10.96
   4  10  -6   64.68    5.93
  -4  10   6   61.56    5.81
  -4 -10   6   37.77    7.22
  -4 -10   5  607.66   30.33
   4 -10  -5  609.08   31.90
   4 -10  -5  738.15   37.86
   4  10  -5  672.75   34.51
  -4  10   5  661.16   33.72
  -4 -10   5  630.02   35.78
  -4 -10   4 1164.02   54.30
   4 -10  -4 1039.90   49.75
   4  10  -4  969.19   45.29
   4 -10  -4 1348.98   63.44
   4  10  -4 1191.67   55.94
  -4  10   4 1131.37   53.50
  -4 -10   4 1100.61   54.57
  -4 -10   3  330.42   14.37
   4 -10  -3  366.04   16.74
   4 -10  -3  407.88   17.76
   4  10  -3  356.10   15.17
  -4 -10   3  338.45   14.23
  -4  10   3  330.04   14.56
  -4 -10   3  320.97   16.51
   4 -10  -2  567.22   24.77
  -4 -10   2  549.22   23.36
   4  10  -2  540.07   22.03
  -4 -10   2  524.90   21.26
  -4  10   2  453.23   18.98
   4 -10  -2  515.09   23.08
  -4 -10   2  569.78   26.60
   4 -10  -2  628.52   27.12
   4 -10  -1  143.16    7.41
  -4 -10   1  138.25    6.79
  -4  10   1  135.06    6.09
   4 -10  -1   97.43    7.83
   4 -10  -1   97.50    5.58
  -4 -10   1  112.46    7.29
   4 -10   0   55.84    4.06
  -4 -10   0   47.28    3.87
  -4  10   0   53.28    3.41
   4  10   0   54.89    8.86
   4 -10   0   41.04    3.97
   4 -10   1  111.06    6.28
  -4 -10  -1  109.69    6.55
  -4  10  -1   93.50    5.02
   4  10   1  119.87   15.14
   4 -10   1  122.40    7.72
   4 -10   2  646.90   19.51
  -4 -10  -2  636.57   20.07
  -4 -10  -2  636.76   17.50
   4  10   2  656.75   17.81
  -4  10  -2  669.53   19.79
   4  10   2  713.10   22.05
   4 -10   2  686.94   23.10
   4 -10   3  980.03   49.05
  -4 -10  -3 1140.17   55.08
  -4 -10  -3 1141.39   53.60
  -4  10  -3 1172.78   55.97
   4  10   3 1007.17   49.09
   4 -10   3 1197.78   58.85
   4 -10   4  354.26   26.67
  -4 -10  -4  391.40   16.98
  -4 -10  -4  313.49   12.71
  -4  10  -4  345.51   14.86
   4  10   4  318.85   17.26
   4 -10   4  285.91   14.58
   4 -10   5   83.67    6.73
  -4 -10  -5  101.98    8.89
  -4 -10  -5  104.30    9.04
  -4  10  -5   87.29    7.07
   4  10   5   93.08   18.96
   4 -10   5   92.13    8.63
   4 -10   6   93.35    9.32
  -4 -10  -6   72.12    7.84
  -4 -10  -6   77.07    7.29
  -4  10  -6   68.15    7.49
   4  10   6   97.34   17.65
   4 -10   6   82.25    9.34
  -4 -10  -7   78.90    8.67
  -4 -10  -7   67.31    7.03
  -4  10  -7   58.11    6.95
   4  10   7   36.67   15.09
   4 -10   7   53.35    7.25
   4 -12  -8   11.67    3.24
   4  12  -8   19.26    4.27
  -4 -12   8    8.46    4.75
   4 -12  -7   24.63    4.47
   4 -12  -7   16.79    4.08
   4  12  -7   20.77    3.78
  -4  12   7   18.58    5.36
  -4 -12   7   16.82    5.55
   4 -12  -6  208.86   17.62
   4 -12  -6  168.16   23.31
   4  12  -6  148.23   12.75
  -4  12   6  144.65   13.12
  -4 -12   6  201.70   19.00
  -4 -12   5  144.24   10.66
   4 -12  -5  171.29   13.78
   4 -12  -5  176.18   13.47
   4  12  -5  155.09   11.97
  -4  12   5  170.03   13.07
  -4 -12   5  181.44   16.76
  -4 -12   4   98.28    5.99
   4 -12  -4  122.65    8.92
   4 -12  -4  116.06    8.82
   4  12  -4  123.82    7.35
  -4  12   4  114.46    7.19
  -4 -12   4  119.35   10.32
   4 -12  -3  123.48    7.95
  -4 -12   3  107.86    6.34
   4 -12  -3   96.91    5.63
   4  12  -3  107.23    5.85
  -4 -12   3  105.16    8.47
   4 -12  -3   97.75    6.49
   4 -12  -2 2169.21  101.79
  -4 -12   2 2246.58  105.28
   4  12  -2 2040.81   94.05
  -4  12   2 2377.63  110.91
  -4 -12   2 2151.70  102.67
   4 -12  -2 1910.88   89.93
   4 -12  -1   17.34    3.18
  -4 -12   1   19.65    2.50
  -4  12   1   10.34    1.39
   4 -12  -1   15.27    2.51
   4 -12   0  292.53   15.55
  -4 -12   0  266.15   14.28
  -4  12   0  279.83   14.12
   4  12   0  287.69   15.75
   4 -12   0  261.41   14.61
   4 -12   1   29.11    3.35
  -4 -12  -1   52.43    4.42
  -4  12  -1   32.60    2.94
   4  12   1   45.96    9.72
   4 -12   1   67.46    6.88
   4 -12   2   61.32    4.77
  -4 -12  -2   54.77    5.14
  -4 -12  -2   57.00    3.42
  -4  12  -2   60.04    4.50
   4  12   2   65.05   11.25
   4 -12   2   47.23    5.23
   4 -12   3  124.61    6.75
  -4 -12  -3  128.80    7.93
  -4 -12  -3  132.96    5.70
  -4  12  -3  114.69    6.47
   4  12   3  121.98   12.77
   4 -12   3  137.34   10.01
   4 -12   4   84.62   10.51
  -4 -12  -4   77.94    5.61
  -4  12  -4   92.40    7.44
   4  12   4   95.14   16.92
   4 -12   4  100.57    9.71
   4 -12   5  238.30   17.86
  -4 -12  -5  233.07   18.29
  -4  12  -5  257.07   19.78
   4  12   5  259.32   22.14
   4 -12   5  288.83   23.32
   4 -12   6   34.65    9.82
  -4 -12  -6   41.22    9.24
  -4  12  -6   26.48    6.13
   4  12   6   30.09   11.99
   4 -12   6   49.97    8.49
   4 -14  -7   46.83   10.15
   4 -14  -7   23.27   11.14
   4  14  -7   52.63    7.58
  -4 -14   7   49.58   12.58
   4 -14  -6    7.97    2.60
   4 -14  -6    4.10    4.12
   4  14  -6   14.27    3.38
  -4 -14   6    9.77    5.00
   4 -14  -5   34.04    4.35
   4 -14  -5   39.69    4.63
   4  14  -5   31.03    3.27
  -4  14   5   19.87    7.62
  -4 -14   5   37.39    6.26
  -4 -14   4   21.99    2.73
   4 -14  -4   32.42    4.27
   4 -14  -4   26.16    2.55
   4  14  -4   17.32    2.09
  -4  14   4   26.80    3.42
  -4 -14   4   28.46    6.19
  -4 -14   3  183.46    8.57
  -4  14   3  154.32    6.68
   4 -14  -3  173.95    9.86
   4 -14  -2  166.01    9.08
  -4 -14   2  185.81    8.86
  -4  14   2  167.81    7.46
   4 -14  -2  185.72    9.83
  -4 -14   2  166.60   10.73
   4 -14  -1  461.25   25.17
  -4 -14   1  411.13   22.18
  -4  14   1  397.69   20.62
   4 -14  -1  362.52   20.40
  -4 -14   1  474.56   27.81
   4 -14   0  370.39   20.51
  -4 -14   0  398.54   21.77
  -4  14   0  352.89   18.49
   4 -14   0  343.27   19.77
  -4 -14   0  405.77   23.97
   4 -14   1  241.10   11.47
  -4 -14  -1  288.07   13.34
  -4  14  -1  255.94   10.91
   4  14   1  239.54   18.24
   4 -14   1  254.56   13.47
   4 -14   2  173.19   13.88
  -4 -14  -2  187.47   15.09
  -4  14  -2  175.57   13.55
   4  14   2  146.32   29.27
   4 -14   2  131.46   12.34
   4 -14   3  311.16   25.01
  -4 -14  -3  359.77   29.34
  -4  14  -3  289.59   23.37
   4  14   3  296.89   24.48
   4 -14   3  255.14   22.19
   4 -14   4  251.15   18.77
  -4 -14  -4  241.22   18.95
  -4  14  -4  255.57   19.24
   4  14   4  288.40   22.90
   4 -14   4  297.97   23.88
   4 -14   5    7.09    4.56
  -4 -14  -5    2.10    2.38
  -4  14  -5    5.57    2.08
   4  14   5    9.32    3.45
   4 -14   5   22.24    6.06
   4 -16  -6   26.40    7.14
   4 -16  -6   11.90    5.28
  -4 -16   6   20.49    7.99
   4 -16  -5   41.24    6.96
   4 -16  -5   41.02    5.74
  -4 -16   5   73.70   10.57
  -4 -16   4   47.68    5.72
   4 -16  -4   50.79    7.08
  -4  16   4   42.08    4.70
  -4 -16   4   42.53    7.72
   4 -16  -4   50.24    6.92
  -4 -16   3   14.01    2.68
   4 -16  -3   11.38    2.95
  -4  16   3   11.50    1.94
  -4 -16   3    9.61    4.64
   4 -16  -3    8.29    2.26
   4 -16  -2   93.89    8.17
  -4 -16   2  107.95    9.72
  -4  16   2  100.39    7.14
   4 -16  -2   85.09    7.86
  -4 -16   2  111.16   11.99
   4 -16  -1   95.26    8.19
  -4 -16   1   78.34    6.77
  -4  16   1   70.85    5.37
   4 -16  -1   69.63    7.29
  -4 -16   1   80.56   10.04
   4 -16   0   55.78    5.69
  -4 -16   0   68.92    6.40
  -4  16   0   46.17    3.87
   4 -16   0   53.87    6.29
  -4 -16   0   58.82    7.49
   4 -16   1  221.91   18.82
  -4 -16  -1  206.02   17.61
  -4  16  -1  206.86   16.97
   4 -16   1  197.76   18.29
   4 -16   2   39.86    4.45
  -4 -16  -2   39.03    4.86
  -4  16  -2   36.57    3.82
   4  16   2   35.70   12.98
   4 -16   2   64.96    7.74
   4 -16   3  102.42    9.67
  -4 -16  -3  137.35   12.87
  -4  16  -3  113.38   10.25
   4  16   3  117.94   11.78
   4 -16   3  117.04   12.87
   4 -16   4  111.47   11.59
  -4 -16  -4  120.24   12.07
  -4  16  -4  111.49   10.49
   4  16   4   89.75   15.91
   4 -16   4  129.74   14.16
   4 -18  -4   41.78    9.34
  -4 -18   4   34.22    8.81
  -4 -18   3  174.27   15.90
   4 -18  -3  132.66   13.36
  -4 -18   3  185.71   19.47
   4 -18  -2   77.61    8.86
  -4 -18   2   39.17    5.05
  -4  18   2   60.03    5.77
   4 -18  -2   54.63    7.20
  -4 -18   2   62.68    8.52
   4 -18  -1   20.40    4.44
  -4 -18   1   18.32    3.77
  -4  18   1   16.24    2.43
   4 -18  -1   22.33    5.42
  -4 -18   1   14.50    5.66
   4 -18   0   21.69    4.59
  -4 -18   0   11.49    2.94
  -4  18   0   16.45    2.77
   4 -18   0   16.13    4.91
  -4 -18   0   16.46    6.80
   4 -18   1  109.89   11.09
  -4 -18  -1  112.45   11.25
  -4  18  -1   95.38    9.04
   4 -18   1  106.78   11.97
  -4 -18  -1  163.34   16.76
   4 -18   2    7.52    2.75
  -4 -18  -2    8.52    3.76
  -4  18  -2    5.46    2.60
   4  18   2    8.26    3.81
   4 -18   2    5.56    3.97
   4 -18   3  101.63    9.91
  -4 -18  -3   99.34   10.08
  -4  18  -3   77.25    7.60
   4  18   3   57.49   24.75
   4 -18   3   95.54   11.46
   4 -20  -2   73.58    8.14
  -4 -20   2   83.13    8.85
  -4 -20   2   68.89   10.16
   4 -20  -1  207.65   17.92
  -4 -20   1  228.80   19.20
  -4 -20   1  218.77   20.77
   4 -20   0   70.46    7.73
  -4 -20   0   66.11    7.40
   4 -20   0   30.30    7.90
  -4 -20   0   36.21    8.24
   5   1  -9  305.11   25.39
   5  -1  -9  290.15   24.30
  -5   1   9  305.37   25.65
  -5  -1   9  240.31   20.64
   5  -1  -8    4.68    2.11
   5   1  -8    1.79    1.93
  -5   1   8    6.81    2.60
  -5  -1   8    4.35    3.14
   5  -1  -7  605.36   30.40
   5  -1  -7  629.13   32.99
   5   1  -7  588.94   31.02
  -5   1   7  603.87   31.68
  -5  -1   7  574.27   30.62
   5   1  -6  793.47   20.81
   5   1  -6  899.40   23.60
   5  -1  -6  886.12   24.04
  -5   1   6  855.11   23.19
   5  -1  -6  923.65   26.94
   5   1  -6  830.20   24.62
  -5   1   6  918.20   26.88
  -5  -1   6  927.00   27.80
   5   1  -5  525.74   19.44
   5   1  -5  563.11   20.76
   5  -1  -5  509.67   19.38
  -5   1   5  521.25   19.78
   5  -1  -5  513.92   20.61
   5   1  -5  570.45   22.68
  -5   1   5  484.52   19.53
  -5  -1   5  544.77   22.63
   5   1  -4 1476.19   39.36
   5  -1  -4 1488.86   40.35
  -5   1   4 1555.67   42.12
  -5  -1   4 1476.17   39.40
   5   1  -4 1668.08   46.11
  -5   1   4 1500.85   41.81
  -5  -1   4 1494.27   42.62
   5  -1  -4 1327.72   37.49
   5   1  -4 1332.09   38.06
   5   1  -3  411.14    9.76
   5  -1  -3  405.27    9.92
  -5  -1   3  376.81    8.88
  -5   1   3  400.41    9.84
   5  -1  -3  460.27   11.83
   5   1  -3  419.62   11.58
  -5  -1   3  372.23    9.88
  -5   1   3  389.36   10.18
  -5  -1   3  428.24   12.32
   5  -1  -3  403.61   10.54
   5   1  -3  431.45   12.05
   5   1  -2   47.25    1.71
   5  -1  -2   52.23    2.11
  -5  -1   2   47.48    1.72
  -5   1   2   51.95    2.07
   5   1  -2   43.86    1.99
  -5   1   2   48.19    5.97
  -5  -1   2   50.79    2.08
  -5  -1   2   42.97    3.13
  -5   1   2   49.99    1.69
  -5   1   2   47.57    1.80
  -5  -1   2   56.97    2.75
   5   1  -1 1756.55   34.69
  -5  -1   1 1776.74   34.99
   5  -1  -1 1794.94   35.39
  -5   1   1 1962.96   38.36
  -5  -1   1 1816.72   35.32
   5   1  -1 1837.71   36.03
   5  -1  -1 1775.47   34.31
  -5  -1   1 1890.46   36.85
  -5   1   1 1809.05   34.79
   5   1   0  417.56    9.76
  -5  -1   0  371.76    8.91
  -5   1   0  400.88    9.27
  -5  -1   0  411.48    8.90
  -5   1   0  379.27    8.41
   5  -1   0  409.40    8.95
   5   1   0  404.00    8.64
   5   1   0  431.94    9.74
   5  -1   0  411.38    9.08
  -5  -1   0  376.14    8.70
  -5   1   0  409.84    9.29
   5  -1   1 1946.04   44.38
  -5  -1  -1 1846.50   41.58
  -5   1  -1 1817.63   41.10
   5   1   1 1686.19   37.71
   5   1   1 1604.82   36.81
   5  -1   1 1800.24   41.07
  -5  -1  -1 1666.61   38.35
  -5   1  -1 1771.10   40.83
  -5  -1  -2   86.12    3.80
  -5   1  -2   76.49    3.68
   5   1   2   83.47    4.11
   5  -1   2   67.21    3.77
   5  -1   3 1378.02   52.05
  -5  -1  -3 1297.72   49.31
  -5  -1  -3 1438.39   54.22
  -5   1  -3 1337.75   50.58
   5   1   3 1224.52   46.76
   5  -1   3 1475.66   56.07
  -5  -1  -4  249.22    9.20
  -5   1  -4  263.82    9.42
  -5  -1  -4  278.49   10.17
  -5   1  -4  233.58    9.07
   5  -1   4  247.41    9.72
  -5  -1  -5 1215.71   61.47
  -5   1  -5 1166.84   59.08
  -5  -1  -5 1307.33   48.73
  -5   1  -5 1267.04   47.40
   5   1   5 1175.46   60.04
  -5  -1  -6   15.73    2.64
  -5   1  -6   21.09    2.96
  -5  -1  -6   20.52    3.69
  -5   1  -6   16.92    3.18
   5   1   6   20.21    3.55
  -5  -1  -7  127.45   11.54
  -5   1  -7  142.83   12.90
  -5  -1  -7  158.55   14.57
  -5   1  -7  135.47   12.54
   5   1   7  117.76   11.23
   5  -1   7  117.34   11.32
   5  -3  -9   33.36    5.45
   5   3  -9   32.90    5.70
  -5   3   9   25.15    4.44
  -5  -3   9   25.45    5.05
   5  -3  -8   39.12    4.39
   5   3  -8   52.18    5.33
  -5   3   8   56.91    5.39
  -5  -3   8   68.59    6.77
   5  -3  -7  247.95   13.36
   5  -3  -7  238.59   13.80
   5   3  -7  241.47   14.04
  -5   3   7  252.20   14.20
  -5  -3   7  297.68   18.02
   5  -3  -6  175.42    9.17
   5  -3  -6  216.13   11.80
   5   3  -6  210.28   11.53
  -5   3   6  200.83   10.79
  -5  -3   6  182.09   11.46
   5  -3  -5  603.32   23.18
  -5   3   5  542.13   20.91
   5  -3  -5  673.87   26.57
   5   3  -5  639.08   25.17
  -5   3   5  623.15   24.17
  -5  -3   5  610.26   25.80
   5  -3  -4 2464.47   66.74
  -5   3   4 2453.35   66.39
   5  -3  -4 2380.12   65.35
   5   3  -4 2354.01   64.23
  -5   3   4 2515.89   67.85
  -5  -3   4 2501.64   70.33
   5  -3  -4 2522.86   68.95
  -5  -3   3 1879.31   41.22
   5  -3  -3 2008.40   45.34
  -5   3   3 1879.04   42.53
  -5  -3   3 1975.55   43.38
   5   3  -3 1980.81   44.66
  -5  -3   3 1996.93   45.14
  -5   3   3 1929.41   42.60
   5  -3  -3 1678.13   37.63
  -5  -3   3 1925.06   45.75
   5   3  -3 1864.28   43.84
  -5  -3   2  614.98   12.57
   5  -3  -2  661.75   14.37
  -5   3   2  640.58   13.95
  -5  -3   2  630.89   12.97
   5   3  -2  678.94   14.07
  -5  -3   2  593.88   12.54
  -5  -3   2  591.58   13.25
  -5  -3   1 1477.23   29.35
  -5   3   1 1660.10   33.29
  -5  -3   1 1610.14   31.89
  -5   3   1 1468.77   29.34
  -5  -3   1 1590.37   30.87
   5   3  -1 1526.53   30.93
  -5  -3   1 1545.07   30.92
   5  -3  -1 1602.03   30.57
  -5   3   1 1470.34   28.56
  -5  -3   0  480.04   11.07
  -5  -3   0  443.84    9.23
  -5   3   0  452.06   10.04
   5   3   0  469.87   11.25
  -5  -3   0  461.15   10.61
   5  -3   0  465.47   10.28
  -5   3   0  489.79   11.36
   5  -3   1 3162.63   71.00
  -5  -3  -1 3105.50   69.75
  -5  -3  -1 3218.27   71.18
  -5   3  -1 3108.59   69.15
   5   3   1 3401.05   74.88
   5  -3   1 3166.28   71.01
  -5   3  -1 3262.12   73.84
   5  -3   2  210.45    7.52
  -5  -3  -2  184.85    7.07
  -5  -3  -2  213.24    7.15
  -5   3  -2  210.34    7.55
   5  -3   2  172.64    6.95
   5  -3   3  428.51   17.93
  -5  -3  -3  415.33   17.17
  -5  -3  -3  407.00   16.54
  -5   3  -3  446.54   18.16
   5   3   3  383.94   16.10
   5  -3   3  450.51   18.93
   5  -3   4  183.84   13.06
  -5  -3  -4  198.09   11.13
  -5  -3  -4  211.15   11.44
  -5   3  -4  182.18   10.17
   5   3   4  211.20   11.77
   5  -3   4  206.56   11.93
  -5  -3  -5  349.97   19.23
  -5  -3  -5  321.06   17.79
  -5   3  -5  345.66   19.26
   5   3   5  274.25   15.76
   5  -3   5  364.92   20.62
  -5  -3  -6  142.28   12.48
  -5  -3  -6  140.83   12.35
  -5   3  -6  173.85   15.06
   5   3   6  107.06   10.06
   5  -3   6  147.88   13.42
  -5  -3  -7  107.87   10.73
  -5   3  -7  120.51   11.39
  -5  -3  -7  100.60   10.25
  -5   3  -7  125.86   12.27
   5   3   7   92.11    9.52
   5  -5  -9  105.22   10.57
   5   5  -9  104.78   10.50
  -5   5   9   71.65    7.88
  -5  -5   9  129.12   13.49
   5  -5  -8   75.19    5.86
   5  -5  -8   88.95    7.42
   5   5  -8   83.44    7.48
  -5   5   8   84.13    6.69
  -5  -5   8   91.69    8.96
   5  -5  -7   51.26    3.96
   5  -5  -7   47.27    4.24
   5   5  -7   49.01    4.55
  -5   5   7   46.20    3.45
  -5  -5   7   30.56    4.69
   5  -5  -6  346.74   17.38
   5  -5  -6  355.43   18.29
   5   5  -6  350.27   17.99
  -5   5   6  385.28   19.02
  -5  -5   6  374.42   21.20
   5  -5  -5  613.27   25.95
   5  -5  -5  583.63   25.05
   5   5  -5  633.14   26.99
  -5   5   5  513.94   21.57
   5  -5  -5  462.03   20.40
  -5  -5   5  587.44   27.10
   5  -5  -4   39.09    2.80
   5  -5  -4   40.08    5.06
   5   5  -4   43.13    2.86
  -5   5   4   39.56    2.18
   5  -5  -4   38.51    2.63
  -5  -5   4   34.82    3.77
  -5  -5   3  260.24    6.62
   5  -5  -3  279.81    8.34
  -5  -5   3  281.94    6.94
   5  -5  -3  272.59    7.95
   5   5  -3  267.34    7.28
  -5  -5   3  236.59    6.63
  -5   5   3  268.08    6.58
   5  -5  -3  306.91    7.82
  -5  -5   3  221.96    8.41
  -5  -5   1  703.37   17.10
   5   5  -1  692.28   16.53
  -5  -5   1  663.30   15.00
  -5  -5   1  750.22   16.74
   5  -5  -1  701.26   16.28
  -5   5   1  692.65   16.21
   5  -5   0  428.24   11.44
  -5  -5   0  414.59    9.48
  -5  -5   0  472.24   10.90
   5   5   0  502.94   13.42
   5  -5   0  461.70   11.90
  -5   5   0  419.32   11.30
   5  -5   1  403.43   13.25
  -5  -5  -1  423.71   11.84
  -5  -5  -1  415.58   10.20
  -5   5  -1  397.88   10.49
   5   5   1  465.73   10.98
   5   5   1  444.98   13.36
   5  -5   1  446.02   12.51
  -5   5  -1  391.60   11.92
   5  -5   2  612.35   25.12
  -5  -5  -2  594.32   23.62
  -5  -5  -2  688.51   26.24
  -5   5  -2  642.15   25.08
   5   5   2  659.60   24.89
   5   5   2  618.47   24.46
   5  -5   2  712.95   28.25
   5  -5   3  313.00   14.17
  -5  -5  -3  305.89   13.70
  -5   5  -3  333.77   15.13
   5   5   3  330.29   15.16
   5  -5   3  298.49   14.32
   5  -5   4   87.37    5.66
  -5  -5  -4   77.18    5.79
  -5  -5  -4   63.29    4.89
  -5   5  -4   62.44    4.73
   5   5   4   52.48    4.24
   5  -5   4   56.77    5.19
   5  -5   5  373.78   15.55
  -5  -5  -5  407.03   17.47
  -5  -5  -5  397.72   16.61
  -5   5  -5  374.63   16.37
   5   5   5  479.26   20.06
   5  -5   5  403.55   18.01
  -5  -5  -6   11.35    2.91
  -5   5  -6   19.88    3.11
  -5  -5  -6   17.21    3.18
  -5   5  -6   31.30    4.46
   5   5   6   20.45    3.37
   5  -5   6   20.40    4.21
  -5  -5  -7  146.91   14.08
  -5   5  -7  171.61   15.54
  -5  -5  -7  192.40   17.61
  -5   5  -7  168.98   16.11
   5   5   7  158.01   15.16
   5  -5   7  162.21   16.04
   5  -7  -9  106.76   18.57
   5   7  -9  121.83   12.24
  -5   7   9  105.42   10.41
  -5  -7   9  120.64   13.32
   5  -7  -8   41.27    5.30
   5   7  -8   58.64    7.32
  -5   7   8   52.05    6.09
  -5  -7   8   36.34    6.25
   5  -7  -7    3.93    2.60
   5  -7  -7    3.97    2.06
   5   7  -7    5.16    2.89
  -5   7   7    5.31    1.57
  -5  -7   7    6.58    3.93
   5  -7  -6   29.13    2.98
   5  -7  -6   25.35    4.17
   5   7  -6   31.60    3.25
  -5   7   6   28.55    2.52
  -5  -7   6   24.04    4.46
   5  -7  -5   32.87    3.04
   5  -7  -5   30.14    3.41
   5   7  -5   38.50    2.85
  -5   7   5   37.30    2.29
  -5  -7   5   35.68    4.98
  -5  -7   4  300.39   12.40
   5  -7  -4  286.32   13.15
   5   7  -4  268.72   11.07
   5  -7  -4  334.82   14.88
   5   7  -4  317.14   13.98
  -5   7   4  249.15   11.47
   5  -7  -4  306.03   13.33
  -5  -7   4  287.79   14.88
   5  -7  -3  841.93   24.81
  -5  -7   3  844.01   23.45
   5   7  -3  772.17   21.40
   5  -7  -3  825.35   23.84
   5   7  -3  776.55   21.78
  -5  -7   3  757.00   21.22
  -5   7   3  852.23   23.50
   5  -7  -3  812.45   22.44
  -5  -7   3  792.61   25.54
   5  -7  -2  475.80   15.10
  -5  -7   2  451.41   13.44
   5   7  -2  418.09   12.36
   5  -7  -2  448.57   13.35
   5   7  -2  451.53   12.93
  -5  -7   2  449.14   12.56
   5  -7  -2  456.19   12.72
   5  -7  -2  424.16   12.41
  -5  -7   2  515.73   17.80
   5  -7  -1   15.38    2.40
  -5  -7   1   13.45    1.47
  -5   7   1   13.40    1.42
   5  -7  -1    8.82    1.84
   5  -7  -1   13.90    1.48
   5  -7   0  734.78   21.79
  -5  -7   0  736.62   21.74
  -5   7   0  698.36   20.00
   5   7   0  727.40   21.91
   5  -7   0  668.90   20.12
  -5   7   0  613.62   18.56
   5  -7   1  157.16    6.28
  -5  -7  -1  134.76    5.93
  -5  -7  -1  147.82    4.68
  -5   7  -1  128.40    5.12
   5   7   1  131.70    3.97
   5   7   1  144.61    6.31
   5  -7   1  133.62    6.19
   5  -7   2  186.26    9.42
  -5  -7  -2  178.90    9.19
  -5  -7  -2  187.83    8.44
  -5   7  -2  190.79    9.30
   5   7   2  192.71    8.43
   5   7   2  207.66   10.22
   5  -7   2  193.02   10.20
   5  -7   3  326.90   11.23
  -5  -7  -3  315.94   11.39
  -5  -7  -3  260.61    8.68
  -5   7  -3  266.41    9.60
   5   7   3  285.60   11.02
   5  -7   3  285.27   11.29
   5  -7   4  324.69   17.63
  -5  -7  -4  306.02   17.27
  -5  -7  -4  299.88   16.11
   5   7   4  367.63   20.16
   5  -7   4  308.82   17.92
   5  -7   5  240.14   18.06
  -5  -7  -5  244.25   18.86
  -5  -7  -5  218.06   16.49
   5   7   5  251.68   19.43
   5  -7   5  258.95   20.26
   5  -7   6   74.49    6.97
  -5  -7  -6   76.02    7.40
  -5  -7  -6   77.77    7.45
  -5   7  -6   68.66    8.31
   5   7   6   82.82    7.87
   5  -7   6   61.50    7.98
  -5  -7  -7  223.74   20.91
  -5   7  -7  254.91   23.02
  -5  -7  -7  276.82   25.19
  -5   7  -7  279.71   25.98
   5   7   7  253.65   23.64
   5  -7   7  293.44   27.54
   5  -9  -9   29.28    9.87
  -5  -9   9   68.01    9.47
   5  -9  -8    6.29    2.22
   5  -9  -8   14.27    3.81
   5   9  -8    2.14    2.37
  -5   9   8    7.20    1.91
  -5  -9   8   14.34    5.58
   5  -9  -7  120.97   10.70
   5  -9  -7  112.65   12.70
   5   9  -7  107.23    9.68
  -5   9   7   91.62    7.81
  -5  -9   7  110.50   12.46
   5  -9  -6  228.51   10.71
   5  -9  -6  222.05   11.50
   5   9  -6  207.28    9.82
  -5   9   6  228.94   10.20
  -5  -9   6  252.98   14.60
  -5  -9   5  153.41    7.42
   5  -9  -5  152.82    8.98
   5  -9  -5  147.52    8.48
   5   9  -5  155.62    8.82
  -5   9   5  150.19    8.21
  -5  -9   5  147.09   11.36
  -5  -9   4  357.67   10.44
   5  -9  -4  333.39   11.53
   5   9  -4  329.73    9.56
   5  -9  -4  362.25   12.04
   5   9  -4  370.47   11.42
  -5   9   4  349.23   10.94
   5  -9  -4  309.58    9.71
  -5  -9   4  359.59   15.17
   5  -9  -3  169.59    8.89
  -5  -9   3  206.73    9.32
   5   9  -3  173.55    7.92
   5  -9  -3  223.50   10.51
   5   9  -3  183.35    8.13
  -5  -9   3  200.78    8.73
   5  -9  -3  180.75    8.04
  -5  -9   3  218.86   12.48
   5  -9  -3  181.83    8.57
  -5  -9   2  491.20   19.38
   5   9  -2  460.81   17.18
  -5  -9   2  419.45   15.57
  -5   9   2  404.63   15.77
   5  -9  -2  432.97   16.71
   5  -9  -2  511.38   20.18
  -5  -9   2  577.49   25.20
   5  -9  -1  568.18   22.91
  -5  -9   1  622.05   24.44
  -5   9   1  544.55   21.10
   5   9  -1  557.46   23.06
   5  -9  -1  513.52   19.85
   5  -9  -1  548.59   22.23
   5  -9   0  475.76   19.45
  -5  -9   0  502.25   20.38
  -5   9   0  446.92   17.77
   5   9   0  367.68   16.19
   5  -9   0  434.01   18.22
   5  -9   1  324.72   14.85
  -5  -9  -1  363.46   16.58
  -5  -9  -1  316.34   12.82
  -5   9  -1  311.83   13.84
   5   9   1  291.00   11.76
   5   9   1  310.88   15.61
   5  -9   1  308.31   14.90
   5  -9   2  216.15    8.18
  -5  -9  -2  213.30    8.68
  -5  -9  -2  190.13    6.02
  -5   9  -2  220.07    8.22
   5   9   2  184.79    5.69
   5   9   2  202.77    8.40
   5  -9   2  176.54    8.48
   5  -9   3  175.19   10.40
  -5  -9  -3  219.23   12.56
  -5  -9  -3  204.38   10.51
  -5   9  -3  204.81   11.34
   5   9   3  211.75   12.06
   5  -9   3  217.90   13.20
   5  -9   4  294.69   14.03
  -5  -9  -4  318.88   14.39
  -5  -9  -4  314.76   12.90
  -5   9  -4  275.59   12.53
   5   9   4  301.98   14.37
   5  -9   4  288.39   14.05
   5  -9   5  247.40   20.14
  -5  -9  -5  292.95   24.15
  -5  -9  -5  251.83   20.36
  -5   9  -5  270.70   22.36
   5   9   5  302.34   41.40
   5  -9   5  238.73   20.51
  -5  -9  -6  156.20   14.98
  -5  -9  -6  153.06   14.15
  -5   9  -6  156.29   14.90
   5   9   6  137.29   13.17
   5  -9   6  165.55   16.16
   5 -11  -8   13.90    4.48
   5 -11  -8    5.68    3.19
   5  11  -8    9.94    4.03
  -5 -11   8    7.51    6.04
   5 -11  -7   95.47    8.67
   5 -11  -7   76.50   10.99
   5  11  -7   70.45    6.56
  -5 -11   7  108.31   11.71
   5 -11  -6  152.81   10.94
   5 -11  -6  151.14   10.29
   5  11  -6  171.61   11.53
  -5  11   6  134.48    8.98
  -5 -11   6  151.50   13.33
   5 -11  -5  117.10    7.05
   5 -11  -5  120.85    6.49
   5  11  -5  139.16    7.00
  -5  11   5  125.90    9.19
  -5 -11   5  131.39   11.03
  -5 -11   4  346.34   17.00
   5 -11  -4  350.18   18.40
   5 -11  -4  356.26   19.29
   5  11  -4  349.95   17.35
  -5  11   4  317.67   16.28
  -5 -11   4  376.69   21.88
   5 -11  -3  350.79   18.31
  -5 -11   3  245.37   12.50
   5 -11  -3  286.44   14.37
   5  11  -3  303.86   14.66
   5 -11  -3  254.90   12.70
  -5 -11   3  282.96   17.36
   5 -11  -3  280.60   14.57
   5 -11  -2  453.10   15.14
  -5 -11   2  414.06   13.19
   5 -11  -2  377.42   11.28
   5 -11  -2  419.48   13.80
  -5 -11   2  480.04   18.44
   5 -11  -1   11.99    2.45
  -5 -11   1   10.81    1.80
  -5  11   1    9.60    1.20
   5 -11  -1   13.81    2.48
  -5 -11   1   15.20    3.29
   5 -11   0  225.68    8.92
  -5 -11   0  265.61    9.91
  -5  11   0  249.98    8.55
   5  11   0  282.21   11.09
   5 -11   0  277.95   11.05
   5 -11   1  200.31   11.43
  -5 -11  -1  178.17   10.36
  -5  11  -1  157.41    8.58
   5  11   1  193.82   11.47
   5 -11   1  176.55   10.93
   5 -11   2 2006.38  100.07
  -5 -11  -2 1706.44   81.32
  -5 -11  -2 1869.32   86.70
  -5  11  -2 1866.09   87.87
   5  11   2 1846.04   87.96
   5 -11   2 1929.07   97.61
   5 -11   3  463.81   18.91
  -5 -11  -3  460.39   19.67
  -5 -11  -3  419.28   15.78
  -5  11  -3  458.75   18.76
   5  11   3  451.75   19.32
   5 -11   3  529.08   23.36
   5 -11   4  125.56   18.60
  -5 -11  -4  101.91    6.84
  -5  11  -4  135.36    9.66
   5  11   4   91.29   20.83
   5 -11   4  123.17   10.73
   5 -11   5   67.09   12.29
  -5 -11  -5   64.46    8.29
  -5  11  -5   73.65    7.33
   5  11   5   63.14   15.03
   5 -11   5   75.20    8.15
   5 -11   6   95.38    9.48
  -5 -11  -6  129.01   13.24
  -5  11  -6  103.45   11.02
   5  11   6   81.15   25.70
   5 -11   6   97.97   11.14
   5 -13  -7   85.00    9.01
   5 -13  -7   64.01   17.06
   5  13  -7   89.09    8.92
  -5 -13   7   67.66   13.06
   5 -13  -6  122.86   10.80
   5 -13  -6  111.64    9.23
   5  13  -6  102.47    8.62
  -5 -13   6   74.77    9.58
   5 -13  -5   63.52    6.04
   5 -13  -5   69.20    9.57
   5  13  -5   64.61    5.26
  -5  13   5   66.41    6.32
  -5 -13   5   64.64    8.75
  -5 -13   4  209.64   15.53
   5 -13  -4  202.61   16.09
   5 -13  -4  279.97   20.78
   5  13  -4  199.57   14.68
  -5 -13   4  229.33   19.88
   5 -13  -4  190.57   14.71
   5 -13  -3 1383.13   51.68
  -5 -13   3 1305.88   47.71
   5  13  -3 1267.05   45.16
  -5  13   3 1087.07   54.23
  -5 -13   3 1178.27   62.27
   5 -13  -3 1162.03   59.15
   5 -13  -2   78.67    6.51
  -5 -13   2   78.74    6.08
  -5  13   2   58.17    4.04
   5 -13  -2   52.89    4.53
  -5 -13   2   88.85    8.57
   5 -13  -1 1413.05   67.78
  -5 -13   1 1450.69   68.99
  -5  13   1 1401.27   66.01
   5 -13  -1 1361.48   65.29
   5 -13   0  269.33   15.54
  -5 -13   0  229.05   13.51
  -5  13   0  254.70   13.75
   5  13   0  304.34   17.72
   5 -13   0  276.56   16.60
   5 -13   1   86.76    6.58
  -5 -13  -1   78.14    5.99
  -5  13  -1   95.41    6.15
   5  13   1  108.73    8.26
   5 -13   1   90.34    7.25
   5 -13   2  147.67   11.99
  -5 -13  -2  160.18   13.32
  -5  13  -2  164.02   12.74
   5  13   2  158.42   28.75
   5 -13   2  136.30   12.08
   5 -13   3   45.63    6.29
  -5 -13  -3   52.69    5.80
  -5  13  -3   41.27    4.23
   5  13   3   47.80    9.48
   5 -13   3   47.74    5.71
   5 -13   4  450.05   32.42
  -5 -13  -4  528.94   48.93
  -5  13  -4  471.68   34.05
   5  13   4  350.74   26.15
   5 -13   4  507.06   47.72
  -5 -13  -5    5.20    2.79
  -5  13  -5   11.45    2.97
   5  13   5    6.72    3.81
   5 -13   5   16.95    5.05
   5 -15  -6   74.67   15.49
   5 -15  -6   87.88    8.39
  -5 -15   6   72.75   14.21
   5 -15  -5  102.98    9.30
   5 -15  -5  126.46   10.39
  -5 -15   5  120.34   13.12
  -5 -15   4  455.37   29.31
   5 -15  -4  405.42   27.46
  -5  15   4  322.16   20.72
  -5 -15   4  477.82   33.86
  -5 -15   3  174.84   11.60
  -5  15   3  196.65   12.61
  -5 -15   3  168.76   13.47
   5 -15  -3  164.17   11.74
   5 -15  -2  675.60   40.93
  -5 -15   2  580.61   34.95
  -5  15   2  536.81   31.73
   5 -15  -2  453.60   28.11
   5 -15  -1  224.80   17.75
  -5 -15   1  200.58   15.64
  -5  15   1  199.91   14.96
   5 -15  -1  175.10   14.40
  -5 -15   1  201.31   18.00
   5 -15   0   13.03    3.17
  -5 -15   0    5.75    1.91
  -5  15   0    8.45    1.69
   5 -15   0    3.38    3.13
  -5 -15   0    8.75    3.49
   5 -15   1   38.50    4.43
  -5 -15  -1   33.72    4.79
  -5  15  -1   32.45    3.57
   5  15   1   31.13    4.58
   5 -15   1   28.02    4.90
   5 -15   2   39.43    4.68
  -5 -15  -2   41.85    4.67
  -5  15  -2   41.05    4.27
   5  15   2   27.56    5.98
   5 -15   2   45.08    6.26
   5 -15   3   26.10    3.91
  -5 -15  -3   21.67    4.61
  -5  15  -3   14.61    2.76
   5  15   3    6.56    3.42
   5 -15   3    6.46    3.69
   5 -15   4  125.21   11.43
  -5 -15  -4  128.73   12.49
  -5  15  -4  140.61   12.78
   5  15   4  138.23   18.64
   5 -15   4  136.81   14.91
   5 -17  -5   19.97    5.56
  -5  17   5    8.98    2.58
  -5 -17   5   32.22   10.07
   5 -17  -4  127.07   12.60
  -5  17   4  172.58   15.21
   5 -17  -3    7.82    2.97
  -5 -17   3    5.64    1.99
  -5  17   3    3.69    1.75
  -5 -17   3    0.33    3.60
   5 -17  -2  428.21   31.55
  -5 -17   2  420.58   30.44
  -5  17   2  454.19   32.11
   5 -17  -2  496.05   46.06
  -5 -17   2  440.70   34.40
   5 -17  -1    8.69    3.40
  -5 -17   1    1.73    2.00
  -5  17   1    3.37    1.49
   5 -17  -1    9.17    3.90
  -5 -17   1   -0.34    3.74
  -5 -17   0   25.71    4.00
  -5  17   0   23.07    3.22
   5 -17   0   32.18    5.93
  -5 -17   0   33.91    6.71
   5 -17   1   49.70    6.25
  -5 -17  -1   48.81    6.29
  -5  17  -1   43.86    5.06
   5 -17   1   36.39    6.13
  -5 -17  -1   54.28    8.20
   5 -17   2   85.35    8.81
  -5 -17  -2   85.95    9.67
  -5  17  -2   93.38    9.31
   5  17   2   73.51   22.00
   5 -17   2   79.80    9.49
   5 -17   3  168.45   15.85
  -5 -17  -3  170.91   16.74
  -5  17  -3  158.73   15.16
   5  17   3  187.93   18.32
   5 -17   3  144.75   15.55
   5 -19  -3   11.51    3.84
  -5 -19   3   23.70    5.67
   5 -19  -2   94.94   10.39
  -5 -19   2  109.09   11.16
  -5 -19   2  101.16   13.22
   5 -19  -1   51.35    7.64
  -5 -19   1   32.53    7.55
  -5  19   1   33.47    7.11
  -5 -19   1   31.71    8.96
   5 -19   0   89.89   10.11
  -5 -19   0   69.47    7.86
  -5  19   0   75.69    7.66
  -5 -19   0   91.09   12.80
  -5 -19  -1   17.04    4.25
  -5  19  -1   25.85    4.15
   5 -19   1   15.97    5.73
  -5 -19  -1   10.69    4.97
  -6   0  10  112.48   10.69
   6   0  -9    0.61    1.97
  -6   0   9    7.36    3.32
   6   0  -8   15.00    3.13
  -6   0   8   16.26    2.66
   6   0  -7    3.18    0.78
   6   0  -7    6.17    2.13
  -6   0   7    3.00    2.56
   6   0  -6  537.83   14.61
  -6   0   6  524.24   14.23
   6   0  -6  521.37   16.45
  -6   0   6  564.50   18.03
   6   0  -5    2.96    0.90
  -6   0   5    2.08    0.75
   6   0  -5    1.05    1.60
  -6   0   5    5.28    1.78
   6   0  -4 1059.39   28.76
  -6   0   4 1025.52   27.96
   6   0  -4 1077.43   30.55
  -6   0   4 1096.02   31.61
   6   0  -4 1025.01   29.52
   6   0  -3    1.09    0.64
  -6   0   3    1.07    0.68
   6   0  -3    1.80    0.89
  -6   0   3    1.62    0.71
  -6   0   3    4.80    1.56
   6   0  -2 2323.20   51.96
  -6   0   2 2226.60   49.69
   6   0  -2 2332.89   52.29
  -6   0   2 2127.20   48.07
  -6   0   2 2132.25   47.36
  -6   0   2 2272.51   51.15
   6   0  -1    1.68    1.16
  -6   0   1    2.04    0.89
  -6   0   1    0.60    0.52
  -6   0   1    3.01    1.00
   6   0  -1    0.77    0.49
  -6   0   1    0.97    0.78
   6   0   0 2126.96   48.83
  -6   0   0 2302.44   51.40
   6   0   0 2277.73   51.04
  -6   0   0 2172.35   48.90
   6   0   1   -0.45    1.10
  -6   0  -1    4.44    1.47
   6   0   1    3.89    1.83
   6   0   2 1678.44   46.82
  -6   0  -2 1710.78   47.28
   6   0   2 1760.16   49.00
  -6   0  -3    2.16    1.42
   6   0   3    5.89    2.62
  -6   0  -4  274.66   14.69
  -6   0  -4  311.11   16.48
   6   0   4  320.89   16.99
  -6   0  -5    3.20    2.08
  -6   0  -5    2.99    2.26
   6   0   5    2.59    2.21
  -6   0  -6  150.94   11.26
  -6   0  -6  192.28   14.14
  -6   0  -7    2.68    2.64
  -6   0  -7    3.28    2.55
   6   0   7    3.48    2.71
   6   2  -9    8.19    3.24
  -6  -2   9    2.01    2.37
   6  -2  -8   72.94    6.22
   6   2  -8   72.30    6.36
  -6   2   8   59.75    5.22
  -6  -2   8   81.20    7.18
   6  -2  -7  391.55   20.07
   6  -2  -7  423.75   22.86
   6   2  -7  389.66   21.14
  -6   2   7  407.07   21.86
  -6  -2   7  372.67   21.48
   6  -2  -6  725.68   34.17
  -6   2   6  673.09   31.74
   6  -2  -6  681.98   33.16
   6   2  -6  686.35   33.31
  -6   2   6  674.38   32.53
  -6  -2   6  748.50   37.28
   6  -2  -5  708.37   26.88
  -6   2   5  609.91   23.21
   6  -2  -5  691.28   27.13
   6   2  -5  715.36   27.87
  -6   2   5  640.93   24.83
  -6  -2   5  661.24   27.32
   6  -2  -5  625.84   24.94
   6  -2  -4 2130.16   57.72
  -6   2   4 1942.40   52.67
  -6  -2   4 1933.88   51.46
  -6  -2   4 1913.14   50.88
   6   2  -4 1962.01   54.31
  -6   2   4 2017.17   54.76
  -6  -2   4 1973.69   55.85
   6  -2  -4 1953.96   53.45
   6   2  -3  124.53    3.53
   6  -2  -3  132.77    4.49
  -6  -2   3  134.97    3.77
   6   2  -3  132.24    4.45
  -6  -2   3  116.15    4.17
  -6  -2   3  116.80    4.23
  -6   2   3  118.30    3.53
  -6  -2   3  114.15    4.83
   6   2  -2  348.41    8.95
  -6  -2   2  373.22    9.28
   6  -2  -2  343.48    9.09
  -6   2   2  377.06    9.87
   6  -2  -2  384.14   10.15
   6   2  -2  359.46    9.72
  -6  -2   2  377.76    9.56
  -6  -2   2  378.29    9.70
  -6   2   2  360.40    8.18
  -6   2   2  334.92    7.90
  -6  -2   2  346.73    9.91
   6   2  -1  184.89    5.56
  -6  -2   1  180.65    5.69
   6  -2  -1  176.21    7.01
  -6   2   1  164.76    5.23
  -6  -2   1  193.79    6.21
  -6   2   1  215.11    6.08
  -6  -2   1  206.52    5.48
   6   2  -1  191.62    6.23
   6  -2  -1  191.14    5.16
  -6  -2   1  197.56    5.70
  -6   2   1  188.49    5.04
  -6  -2   0 4255.85   93.48
  -6   2   0 4283.93   94.44
   6   2   0 4462.79   98.94
  -6  -2   0 4216.78   93.37
   6  -2   0 4389.81   96.70
  -6   2   0 4258.13   94.26
   6  -2   1  252.77    7.92
  -6  -2  -1  280.49    8.35
  -6  -2  -1  294.24    7.97
   6   2   1  272.68    7.16
   6   2   1  279.54    8.22
   6  -2   1  319.16    9.05
   6  -2   2 1332.29   50.41
  -6  -2  -2 1140.24   43.55
  -6  -2  -2 1277.01   47.95
  -6   2  -2 1244.10   47.02
   6   2   2 1274.15   48.29
   6  -2   2 1294.10   49.11
   6  -2   3  154.35    7.95
  -6  -2  -3  143.92    7.67
  -6  -2  -3  121.94    6.56
  -6   2  -3  125.69    6.93
   6   2   3  120.10    6.71
   6  -2   3  124.57    6.94
   6  -2   4  844.80   40.89
  -6  -2  -4  899.67   43.66
  -6  -2  -4  867.80   42.01
  -6   2  -4  827.00   40.17
   6  -2   4  765.23   37.77
  -6  -2  -5  212.71   10.23
  -6   2  -5  174.27    8.70
  -6  -2  -5  202.11   10.31
  -6   2  -5  196.47    9.94
   6   2   5  179.02    9.17
   6  -2   5  198.31   10.40
  -6  -2  -6  421.50   28.03
  -6   2  -6  388.81   25.87
  -6  -2  -6  381.24   25.56
  -6   2  -6  375.55   25.40
   6   2   6  366.62   24.77
   6  -2   6  381.26   26.20
  -6  -2  -7   32.54    6.29
  -6   2  -7   35.06    6.91
  -6  -2  -7   28.83    5.74
  -6   2  -7   37.37    7.16
   6   2   7   39.13    7.67
   6  -2   7   22.54    5.01
   6  -4  -9    6.83    3.27
   6   4  -9    3.26    2.31
  -6   4   9    4.16    2.02
  -6  -4   9   -0.10    2.75
   6  -4  -8  216.53   18.16
   6   4  -8  179.93   15.35
  -6   4   8  175.56   14.75
  -6  -4   8  186.22   16.81
   6  -4  -7  102.49    5.28
   6  -4  -7   91.16   12.60
   6   4  -7  116.17    6.77
  -6   4   7  103.37    5.64
  -6  -4   7  118.83    8.48
   6  -4  -6  323.69   16.07
   6  -4  -6  348.93   20.76
   6   4  -6  316.09   16.29
  -6   4   6  328.49   16.34
  -6  -4   6  429.78   23.34
   6  -4  -5   36.39    2.83
   6  -4  -5   39.47    5.26
   6   4  -5   33.12    2.93
  -6   4   5   32.75    2.27
   6  -4  -5   30.93    3.07
  -6  -4   5   19.16    3.34
   6  -4  -4   44.31    2.86
   6  -4  -4   48.98    6.44
   6   4  -4   36.48    2.47
  -6   4   4   50.48    2.42
   6  -4  -4   42.46    2.83
  -6  -4   4   43.48    3.94
  -6  -4   3  309.15    9.03
   6  -4  -3  281.03    9.20
  -6  -4   3  314.92    9.15
   6  -4  -3  336.52   10.71
   6   4  -3  300.78    9.24
  -6  -4   3  302.75    9.46
  -6  -4   3  316.42   11.59
  -6  -4   2  401.73   10.10
   6  -4  -2  365.46   10.01
  -6  -4   2  377.74    9.54
   6  -4  -2  362.65   10.02
   6   4  -2  410.97   10.07
  -6  -4   2  389.13    9.67
  -6  -4   2  382.32   11.48
  -6  -4   1 1026.60   24.37
  -6  -4   1 1109.10   25.92
  -6  -4   1 1129.26   25.50
  -6  -4   1 1047.65   23.46
  -6   4   1 1110.54   25.84
   6   4  -1 1092.17   27.47
   6  -4  -1 1146.35   25.57
  -6   4   1 1215.69   27.75
  -6  -4   0  585.46   13.69
  -6   4   0  607.59   14.90
   6   4   0  562.05   15.10
   6  -4   0  572.93   14.07
  -6   4   0  594.28   15.32
   6  -4   1  406.34   12.97
  -6  -4  -1  435.72   13.76
  -6  -4  -1  438.13   12.85
  -6   4  -1  418.26   12.76
   6   4   1  339.62    9.88
   6   4   1  410.51   13.07
   6  -4   1  374.11   12.03
   6  -4   2  884.16   34.86
  -6  -4  -2  900.40   34.81
  -6  -4  -2  937.11   35.51
  -6   4  -2 1008.63   38.50
   6   4   2  978.24   37.65
   6  -4   2  987.37   38.14
   6  -4   3  226.85    8.50
  -6  -4  -3  201.35    7.44
  -6   4  -3  183.73    7.28
   6  -4   3  201.76    8.41
   6  -4   4  116.57    7.40
  -6  -4  -4  101.02    6.89
  -6  -4  -4  110.68    6.90
  -6   4  -4  100.99    6.68
   6   4   4  100.48    6.69
   6  -4   4  133.31    8.70
   6  -4   5   71.44    6.56
  -6  -4  -5   59.86    5.97
  -6  -4  -5   65.78    6.29
  -6   4  -5   67.06    6.69
   6   4   5   64.63    6.45
   6  -4   5   56.11    6.16
  -6  -4  -6   34.06    5.08
  -6   4  -6   32.01    4.65
  -6  -4  -6   33.22    4.78
  -6   4  -6   36.86    5.25
   6   4   6   27.46    4.16
   6  -4   6   40.55    5.84
  -6  -4  -7   45.42    9.86
  -6   4  -7   29.44    6.70
  -6  -4  -7   55.38    6.74
  -6   4  -7   35.51    7.93
   6   4   7   57.37    7.28
   6  -4   7   57.77    7.38
   6  -6  -9   17.17    5.03
   6   6  -9   11.56    3.70
  -6   6   9   13.51    3.11
   6  -6  -8  308.73   20.40
   6  -6  -8  368.18   24.70
   6   6  -8  289.32   19.83
  -6   6   8  311.59   20.63
  -6  -6   8  347.99   25.55
   6  -6  -7  133.93   10.55
   6  -6  -7  163.08   19.33
   6   6  -7  150.18   12.05
  -6   6   7  136.78   10.57
  -6  -6   7  135.21   12.80
   6  -6  -6   24.83    2.53
   6  -6  -6   28.72    4.20
   6   6  -6   23.99    2.69
  -6   6   6   21.41    1.96
  -6  -6   6   25.30    4.34
   6  -6  -5  184.22    7.31
   6  -6  -5  187.02    7.98
   6   6  -5  169.36    6.57
  -6   6   5  185.74    6.07
   6  -6  -5  177.73    7.18
  -6  -6   5  198.16   10.81
  -6  -6   4  410.88   15.33
   6  -6  -4  363.66   15.12
  -6  -6   4  394.77   14.70
   6  -6  -4  456.05   18.31
   6   6  -4  397.75   15.85
  -6   6   4  410.70   15.82
   6  -6  -4  383.53   15.08
  -6  -6   4  402.82   18.40
  -6  -6   3  151.49    5.19
   6  -6  -3  164.30    6.98
  -6  -6   3  157.24    7.65
  -6  -6   2    1.00    0.53
   6  -6  -2    5.55    1.25
  -6  -6   2    3.26    0.79
   6  -6  -2    1.15    0.98
  -6  -6   2    1.28    0.62
  -6  -6   2    3.95    2.27
  -6  -6   1 1186.62   33.33
  -6  -6   1 1213.21   32.51
   6   6  -1 1159.91   33.52
   6  -6  -1 1145.94   31.36
  -6   6   1  990.54   27.50
   6  -6   0   82.70    4.11
  -6  -6   0   90.14    4.60
  -6  -6   0   84.06    2.99
  -6  -6   0   76.80    2.62
  -6   6   0   86.72    3.75
   6   6   0   89.62    4.57
   6  -6   0   92.28    4.06
  -6   6   0   78.31    4.01
   6  -6   1  115.17    6.38
  -6  -6  -1  121.99    6.29
  -6  -6  -1  118.53    5.09
  -6   6  -1  123.44    6.16
   6   6   1  104.81    4.34
   6  -6   1  116.56    6.04
   6  -6   2  511.53   22.34
  -6  -6  -2  467.90   20.71
  -6  -6  -2  441.00   18.69
  -6   6  -2  444.10   19.44
   6   6   2  504.19   22.13
   6  -6   2  481.42   21.55
   6  -6   3  114.68   16.27
  -6  -6  -3  104.62    6.97
  -6  -6  -3   97.93    5.78
  -6   6  -3   99.04    6.27
   6   6   3  118.32    7.37
   6  -6   3  103.96    7.00
   6  -6   4  468.73   24.93
  -6  -6  -4  439.68   23.90
  -6  -6  -4  475.50   24.96
  -6   6  -4  475.63   25.41
   6   6   4  442.94   24.09
   6  -6   4  445.25   24.41
   6  -6   5  115.71    8.74
  -6  -6  -5  108.85    8.58
  -6  -6  -5   86.91    6.73
  -6   6  -5  106.69    8.23
   6   6   5  116.09    8.89
   6  -6   5  104.68    8.86
   6  -6   6  224.86   18.89
  -6  -6  -6  249.60   21.21
  -6  -6  -6  243.20   20.56
  -6   6  -6  277.58   23.39
   6   6   6  218.95   18.86
   6  -6   6  228.13   19.98
  -6   6  -7   18.14    3.75
  -6  -6  -7   26.16    4.68
  -6   6  -7   16.26    3.79
   6   6   7   15.97    3.44
   6  -6   7   20.91    4.88
   6  -8  -9   54.91   17.28
   6   8  -9   59.27    6.47
  -6  -8   9   89.87   11.59
   6  -8  -8   64.56    6.95
   6  -8  -8   65.51   15.65
   6   8  -8   68.38    7.14
  -6  -8   8   63.32    8.50
   6  -8  -7  173.05   11.62
   6  -8  -7  140.51   22.22
   6   8  -7  156.65   10.90
  -6   8   7  136.81    9.03
  -6  -8   7  129.38   11.91
   6  -8  -6  209.96    9.75
   6  -8  -6  281.14   24.30
   6   8  -6  197.60    9.23
  -6   8   6  213.80   10.41
  -6  -8   6  231.66   13.30
   6  -8  -5   35.28    3.79
   6  -8  -5   39.45    6.91
   6   8  -5   36.82    3.30
  -6   8   5   31.49    2.90
   6  -8  -5   25.60    2.54
  -6  -8   5   33.22    5.29
  -6  -8   4  899.35   24.02
   6  -8  -4  958.03   27.80
   6  -8  -4  945.10   28.22
   6   8  -4  977.08   26.92
   6  -8  -4  968.41   26.36
  -6  -8   4  965.02   31.00
   6  -8  -3  500.96   22.01
  -6  -8   3  459.62   19.35
   6   8  -3  420.57   17.66
   6  -8  -3  486.68   21.78
   6   8  -3  429.89   17.97
  -6  -8   3  414.20   17.27
   6  -8  -3  420.59   17.28
  -6  -8   3  427.99   20.53
   6  -8  -3  400.15   16.75
   6  -8  -2  457.05   18.82
  -6  -8   2  413.81   16.49
   6   8  -2  441.89   16.52
  -6  -8   2  407.62   15.25
  -6   8   2  350.90   13.87
   6  -8  -2  402.46   15.24
   6  -8  -2  429.63   16.70
  -6  -8   2  469.36   20.78
   6  -8  -1   88.00    5.39
  -6  -8   1   64.52    3.96
  -6   8   1   67.77    3.82
   6  -8  -1   60.70    4.08
   6   8  -1   87.74   13.57
   6  -8  -1   58.88    3.57
   6  -8   0  157.62    7.63
  -6  -8   0  128.11    6.75
  -6   8   0  142.35    6.72
   6   8   0  148.56    8.11
   6  -8   0  159.49    7.77
  -6   8   0  107.75    5.77
   6  -8   1   52.77    3.63
  -6  -8  -1   42.26    3.44
  -6  -8  -1   47.13    2.38
  -6   8  -1   46.13    3.32
   6   8   1   38.94    1.94
   6   8   1   51.90    8.54
   6  -8   1   38.20    3.92
   6  -8   2  873.22   28.97
  -6  -8  -2 1007.92   29.58
  -6  -8  -2  985.53   26.81
  -6   8  -2 1046.56   29.82
   6   8   2  931.44   24.96
   6   8   2 1056.95   30.86
   6  -8   2 1042.54   30.79
   6  -8   3   79.16   11.87
  -6  -8  -3   64.65    5.18
  -6   8  -3   59.04    4.69
   6   8   3   61.90    9.72
   6  -8   3   57.76    5.04
   6  -8   4  127.47   11.06
  -6  -8  -4  125.71   10.54
  -6  -8  -4  134.36   10.50
  -6   8  -4  135.85   11.08
   6   8   4  151.38   19.97
   6  -8   4  128.32   11.28
   6  -8   5   88.58    7.19
  -6  -8  -5   91.70    8.05
  -6  -8  -5   92.45    7.23
  -6   8  -5  112.96    9.21
   6   8   5  111.03   17.20
   6  -8   5   97.90    9.08
   6  -8   6   91.07   10.72
  -6  -8  -6   93.80    9.82
  -6  -8  -6   84.18    8.64
   6   8   6   89.52    9.29
   6  -8   6   77.11    8.89
   6 -10  -8   29.41    5.60
   6 -10  -8   57.89   17.33
   6  10  -8   42.85    7.68
  -6 -10   8   61.77   12.33
   6 -10  -7  204.33   14.72
   6 -10  -7  186.73   28.46
   6  10  -7  187.81   13.49
  -6 -10   7  213.61   17.72
   6 -10  -6  167.22   11.41
   6 -10  -6  129.34    9.07
   6  10  -6  146.96    9.92
  -6  10   6  145.27    9.45
  -6 -10   6  162.62   13.90
   6 -10  -5  195.11   11.62
   6 -10  -5  216.00   12.82
   6  10  -5  205.55   11.42
  -6  10   5  175.70    9.58
  -6 -10   5  206.36   14.15
   6 -10  -4  438.71   22.27
  -6 -10   4  475.40   22.81
   6 -10  -4  516.40   25.57
   6  10  -4  419.32   20.32
   6 -10  -4  383.32   18.62
  -6 -10   4  455.77   24.99
   6 -10  -3  101.35    7.10
  -6 -10   3   90.84    5.44
   6 -10  -3   69.21    4.38
   6  10  -3   72.31    4.03
  -6 -10   3   74.18    3.93
   6 -10  -3   75.72    4.18
   6 -10  -3   80.58    4.94
  -6 -10   3  107.68    8.56
  -6 -10   2 1325.46   36.62
  -6  10   2 1316.74   36.14
   6 -10  -2 1168.42   31.25
   6 -10  -2 1272.61   34.99
  -6 -10   2 1444.69   43.46
   6 -10  -1  606.78   19.03
  -6 -10   1  574.19   17.58
  -6  10   1  512.39   15.23
   6  10  -1  539.82   17.75
   6 -10  -1  428.97   13.43
   6 -10  -1  474.62   15.04
   6 -10   0  389.62   13.57
  -6 -10   0  359.18   12.34
  -6  10   0  365.80   11.72
   6  10   0  366.93   13.35
   6 -10   0  356.28   12.68
   6 -10   1 1393.07   65.91
  -6 -10  -1 1504.97   71.21
  -6  10  -1 1249.15   58.80
   6  10   1 1361.89   65.01
   6 -10   1 1358.73   64.88
   6 -10   2  154.23    9.12
  -6 -10  -2  164.34    9.99
  -6 -10  -2  169.18    8.39
  -6  10  -2  185.32   10.47
   6  10   2  160.63    9.89
   6 -10   2  181.79   11.16
   6 -10   3 1256.30   49.19
  -6 -10  -3 1228.60   46.51
  -6 -10  -3 1257.67   45.36
  -6  10  -3 1324.56   93.52
   6  10   3 1205.96   45.74
   6 -10   3 1308.29   93.06
  -6 -10  -4    6.52    2.03
  -6  10  -4   10.00    3.40
   6  10   4    1.80    1.45
   6 -10   4    8.80    3.52
   6 -10   5  162.13   14.42
  -6 -10  -5  140.19   12.87
  -6  10  -5  134.23   12.16
   6  10   5  143.41   26.17
   6 -10   5  163.92   15.16
   6 -10   6    4.96    2.73
  -6 -10  -6   10.21    3.59
  -6  10  -6    3.03    2.60
   6  10   6    6.77    3.72
   6 -10   6    6.94    4.09
   6 -12  -8  129.43   11.74
   6 -12  -8  139.49   12.76
   6  12  -8  137.67   12.24
  -6 -12   8  118.38   13.44
   6 -12  -7   12.59    3.45
   6 -12  -7    7.60    3.30
   6  12  -7    5.69    2.31
  -6 -12   7   17.86    6.37
   6 -12  -6   21.07    4.95
   6  12  -6   22.44    3.07
  -6 -12   6   38.38    6.88
   6 -12  -5  151.09   10.80
   6 -12  -5  123.07    9.65
   6  12  -5  148.05    9.76
  -6 -12   5  133.32   11.87
  -6 -12   4   39.08    2.78
   6 -12  -4   31.48    3.42
   6 -12  -4   31.37    3.11
   6  12  -4   31.65    2.30
  -6 -12   4   51.22    6.13
   6 -12  -4   26.44    2.73
   6 -12  -3  141.71    9.20
  -6 -12   3  170.94    9.79
   6  12  -3  162.33    8.63
  -6  12   3  139.04    7.92
  -6 -12   3  191.06   13.61
   6 -12  -3  158.74    9.36
   6 -12  -2  383.34   19.97
  -6 -12   2  386.53   19.59
  -6  12   2  378.46   18.79
   6 -12  -2  367.03   18.74
  -6 -12   2  424.07   24.51
   6 -12  -1  289.78   15.87
  -6 -12   1  270.86   14.47
  -6  12   1  241.73   12.51
   6 -12  -1  263.34   14.52
  -6 -12   1  188.29   12.42
   6 -12   0  108.59    7.24
  -6 -12   0  109.24    7.26
  -6  12   0  100.45    6.20
   6  12   0  139.48   21.68
   6 -12   0  120.99    8.47
   6 -12   1  170.83   10.84
  -6 -12  -1  182.40   11.21
  -6  12  -1  149.53    8.83
   6  12   1  145.62   25.55
   6 -12   1  151.72   10.14
   6 -12   2  203.69   15.80
  -6 -12  -2  191.60   15.37
  -6  12  -2  219.73   16.69
   6  12   2  191.32   15.39
   6 -12   2  183.51   15.56
   6 -12   3   74.70   11.39
  -6 -12  -3   84.94    7.31
  -6  12  -3   76.62    6.28
   6  12   3   88.57   19.28
   6 -12   3   63.24    7.67
   6 -12   4  186.43   15.45
  -6 -12  -4  228.20   17.99
  -6  12  -4  176.78   14.22
   6  12   4  203.33   18.59
   6 -12   4  190.79   15.95
   6 -12   5   78.83   12.78
  -6 -12  -5   67.25   11.58
  -6  12  -5   89.85    8.93
   6  12   5   66.47   22.66
   6 -12   5   88.94   10.52
   6 -14  -7   67.62    7.96
   6 -14  -7   58.09    9.55
  -6 -14   7   98.92   12.76
   6 -14  -6   26.94    5.48
   6 -14  -6   20.01    6.93
  -6 -14   6   10.20    5.40
   6 -14  -5   56.16    5.73
   6 -14  -5   86.65    7.10
  -6 -14   5   53.34    6.84
   6 -14  -4   37.90    4.31
  -6 -14   4   37.20    3.38
  -6 -14   4   56.20    8.07
   6 -14  -3  879.94   63.10
  -6 -14   3  845.69   59.98
  -6  14   3  912.32   64.52
   6 -14  -3  636.70   45.64
  -6 -14   3  901.89   66.32
   6 -14  -2  404.06   30.04
  -6 -14   2  373.89   27.40
  -6  14   2  329.94   23.91
   6 -14  -2  352.56   26.12
  -6 -14   2  453.11   35.55
   6 -14  -1  163.60   13.42
  -6 -14   1  118.73    9.98
  -6  14   1  140.52   10.78
   6 -14  -1  132.91   11.26
  -6 -14   1  173.73   15.66
   6 -14   0   96.32    8.49
  -6 -14   0  115.29    9.85
  -6  14   0  102.58    8.26
   6  14   0  122.74   10.92
   6 -14   0  126.09   11.39
   6 -14   1  172.92   11.96
  -6 -14  -1  169.16   12.21
  -6  14  -1  154.86   10.37
   6  14   1  159.07   11.96
   6 -14   1  140.01   11.04
   6 -14   2   93.05    7.32
  -6 -14  -2   99.06    8.52
  -6  14  -2  106.71    9.78
   6  14   2   83.17   16.84
   6 -14   2   88.20    8.66
   6 -14   3   31.46    7.67
  -6 -14  -3   36.44    5.51
  -6  14  -3   42.80    5.36
   6  14   3   33.24    9.64
   6 -14   3   29.18    5.67
   6 -14   4  190.61   20.90
  -6 -14  -4  107.67   11.04
  -6  14  -4  156.20   14.16
   6  14   4  147.80   14.24
   6 -16  -6    9.98    3.60
   6 -16  -6   13.58    3.25
  -6 -16   6   15.71    6.60
   6 -16  -5  163.32   15.00
  -6 -16   5  151.80   16.62
   6 -16  -4   38.64    5.94
  -6  16   4   22.31    3.13
  -6 -16   4   39.09    7.80
  -6 -16   3    0.86    1.41
  -6  16   3    7.05    1.67
  -6 -16   3   -0.99    3.33
   6 -16  -2   63.13    6.28
  -6 -16   2   65.54    5.82
  -6  16   2   58.91    4.89
  -6 -16   2   77.36    9.20
   6 -16  -1   39.66    5.43
  -6 -16   1   49.33    4.95
  -6  16   1   44.94    4.40
   6 -16  -1   42.06    5.68
  -6 -16   1   42.29    7.08
   6 -16   0   44.42    5.07
  -6 -16   0   32.12    4.22
  -6  16   0   42.96    4.36
   6 -16   0   30.17    5.10
  -6 -16   0   52.58    7.51
   6 -16   1   20.72    3.37
  -6 -16  -1   36.16    5.54
  -6  16  -1   28.96    4.13
   6  16   1   40.51    6.62
   6 -16   1   28.58    5.21
   6 -16   2   50.11    8.69
  -6 -16  -2   61.69    7.26
  -6  16  -2   49.53    8.50
   6  16   2   35.71   10.75
   6 -16   2   50.33    7.58
   6 -16   3  122.41   13.34
  -6 -16  -3  119.42   11.82
  -6  16  -3  106.52   10.14
   6  16   3   77.55   24.06
   6 -16   3  123.01   13.87
   6 -18  -4   67.40    8.31
  -6  18   4   56.31    5.85
  -6 -18   4   84.08   12.69
   6 -18  -3   36.46    7.39
  -6 -18   3   33.13    5.99
  -6  18   3   34.87    6.21
  -6 -18   3   41.82    9.59
   6 -18  -2   69.72   12.38
  -6 -18   2   44.90    7.87
  -6  18   2   71.26   11.61
  -6 -18   2   51.18   10.63
   6 -18  -1   82.82    9.08
  -6 -18   1   78.79    8.38
  -6 -18   1  117.23   14.07
   6 -18   0   27.56    5.79
  -6 -18   0   24.83    4.99
  -6  18   0   19.40    4.18
  -6 -18   0   40.37    9.41
   6 -18   1   69.47    8.31
  -6 -18  -1   40.03    9.01
  -6  18  -1   40.02    8.64
   6 -18   1   40.87    9.65
  -6 -18  -1   58.47    9.03
   6 -18   2   57.39    6.23
  -6 -18  -2   54.63    6.64
  -6  18  -2   65.54    7.26
   6  18   2   54.05    6.67
   6 -18   2   48.42    7.37
   7   1  -9   27.57    4.26
  -7   1   9   34.25    4.67
  -7  -1   9   24.54    4.21
   7   1  -8  261.48   21.58
  -7   1   8  209.17   17.40
  -7  -1   8  216.01   18.28
   7  -1  -7  116.44    6.35
   7  -1  -7  133.22    8.49
   7   1  -7  127.74    8.28
  -7   1   7  143.18    8.87
  -7  -1   7  106.25    7.54
   7  -1  -6  183.95    9.12
   7   1  -6  172.25    9.69
   7  -1  -6  192.67   20.91
  -7   1   6  176.20    9.84
  -7  -1   6  218.36   12.61
   7   1  -5  193.71    8.22
   7  -1  -5  196.25    8.58
  -7   1   5  201.60    8.86
  -7  -1   5  206.02    8.57
   7  -1  -5  208.42   13.20
   7   1  -5  212.18   10.14
  -7   1   5  211.12   10.10
  -7  -1   5  201.79   10.66
   7  -1  -5  170.89    8.86
   7   1  -4  114.95    3.84
   7  -1  -4  110.55    4.00
  -7  -1   4  105.36    3.59
  -7   1   4  109.37    4.04
   7  -1  -4   94.86    4.46
   7   1  -4  124.05    6.55
  -7   1   4  115.62    4.85
  -7  -1   4  126.68    6.03
   7  -1  -4  108.02    4.61
   7   1  -4   97.48    4.86
   7   1  -3 1043.76   28.72
   7  -1  -3  982.97   27.35
  -7  -1   3 1068.91   29.39
  -7   1   3 1054.41   29.32
   7  -1  -3 1027.41   28.94
   7   1  -3  980.84   29.27
  -7  -1   3  981.43   27.51
  -7   1   3  950.52   26.24
  -7   1   3 1143.58   31.90
  -7  -1   3  940.71   27.11
   7   1  -2  990.24   23.26
   7  -1  -2  919.26   22.08
  -7  -1   2  884.18   20.70
  -7   1   2  932.46   22.08
   7   1  -2 1100.93   25.74
   7  -1  -2 1068.01   25.22
   7   1  -2  983.27   23.13
  -7  -1   2  920.65   21.56
  -7   1   2  944.88   21.36
  -7   1   2  850.12   19.90
   7   1  -1 5303.83  117.27
   7  -1  -1 5793.80  155.32
  -7  -1   1 5441.01  119.78
  -7  -1   1 5542.49  147.62
   7   1  -1 5512.67  147.29
   7  -1  -1 5340.21  117.19
  -7   1   1 5445.45  119.51
  -7  -1   0 1262.19   28.88
  -7   1   0 1292.81   29.85
   7   1   0 1334.52   31.30
   7  -1   0 1322.43   30.45
  -7   1   0 1229.06   28.75
   7   1   1 1258.27   35.67
   7  -1   1 1300.87   36.81
  -7  -1  -1 1206.85   33.66
  -7   1  -1 1334.54   37.16
   7   1   1 1201.31   33.90
   7  -1   1 1302.56   36.44
   7  -1   2   22.27    3.69
  -7  -1  -2   16.36    1.85
  -7   1  -2   17.66    2.08
   7   1   2   17.90    2.12
   7  -1   2   18.55    2.14
   7  -1   3  633.56   19.55
  -7  -1  -3  679.26   20.69
  -7  -1  -3  726.94   21.48
  -7   1  -3  664.65   20.11
   7   1   3  696.63   21.27
   7  -1   3  725.16   22.02
  -7  -1  -4  396.68   21.71
  -7   1  -4  375.40   20.36
  -7   1  -4  329.08   18.14
  -7  -1  -4  335.80   18.47
   7   1   4  372.12   20.37
   7  -1   4  325.13   18.21
  -7  -1  -5   67.51    5.87
  -7   1  -5   50.91    4.85
  -7  -1  -5   68.69    6.01
  -7   1  -5   49.36    4.99
   7   1   5   64.06    5.83
   7  -1   5   60.00    6.02
  -7  -1  -6   13.26    3.17
  -7   1  -6   10.94    2.75
  -7  -1  -6   11.08    3.85
  -7   1  -6    7.52    2.77
   7   1   6   12.12    3.00
   7  -1   6    6.26    2.60
  -7  -1  -7   73.10    7.81
  -7   1  -7   91.09    8.78
  -7  -1  -7   83.39    8.46
  -7   1  -7   92.60    9.40
   7  -1   7   90.52    9.12
   7  -3  -9   96.31   16.63
   7   3  -9   91.57    9.27
  -7   3   9   89.97    9.16
  -7  -3   9   90.58   10.04
   7  -3  -8   45.92   10.84
   7   3  -8   25.38    3.64
  -7   3   8   34.52    3.83
  -7  -3   8   28.99    4.30
   7  -3  -7  904.78   33.13
   7  -3  -7  818.22   33.70
   7   3  -7  918.73   34.95
  -7   3   7 1000.19   37.26
  -7  -3   7  917.14   36.97
   7  -3  -6  301.31   14.91
   7  -3  -6  298.91   15.94
   7   3  -6  301.82   15.62
  -7   3   6  271.76   13.75
  -7  -3   6  311.45   17.59
   7  -3  -5  408.60   17.54
   7  -3  -5  419.52   18.58
   7   3  -5  372.65   16.53
  -7   3   5  373.48   15.91
  -7  -3   5  375.61   18.18
   7  -3  -5  281.60   12.76
   7  -3  -4  136.50    6.28
  -7  -3   4  135.61    5.37
  -7  -3   4  128.03    5.06
   7  -3  -4  138.11    6.75
   7   3  -4  151.44    6.86
  -7   3   4  128.42    5.29
  -7  -3   4  153.40    8.18
   7  -3  -4  140.48    6.23
  -7  -3   3  760.23   21.03
   7  -3  -3  825.41   23.50
  -7  -3   3  898.14   24.78
   7   3  -3  897.09   25.56
  -7  -3   3  801.12   24.30
  -7  -3   2  188.44    5.95
   7  -3  -2  209.68    6.49
  -7  -3   2  204.13    5.90
   7   3  -2  229.13    6.47
  -7  -3   2  185.91    5.41
   7   3  -2  192.94    6.36
  -7  -3   2  166.27    5.28
   7  -3  -1  207.83    7.61
  -7  -3   1  195.67    6.03
  -7  -3   1  190.42    5.31
  -7   3   1  184.06    5.62
  -7  -3   1  181.32    4.93
   7   3  -1  202.40    6.75
   7  -3  -1  209.76    5.43
  -7   3   1  173.77    5.10
   7  -3   0  591.22   17.84
  -7  -3   0  507.20   15.42
  -7  -3   0  514.63   14.65
  -7   3   0  558.09   16.49
   7   3   0  539.95   16.45
   7  -3   0  558.25   16.18
  -7   3   0  524.49   15.83
   7  -3   1  388.59   16.38
  -7  -3  -1  426.38   17.44
  -7  -3  -1  458.59   17.88
  -7   3  -1  410.37   16.33
   7   3   1  420.30   17.06
   7  -3   1  458.93   18.30
   7  -3   2  950.45   40.79
  -7  -3  -2 1033.06   43.25
  -7  -3  -2 1008.76   41.63
  -7   3  -2  985.73   41.00
   7   3   2 1098.20   45.75
   7  -3   2 1050.27   43.82
   7  -3   3  957.37   45.91
  -7  -3  -3  885.47   42.72
  -7  -3  -3  916.53   43.68
  -7   3  -3  861.21   41.35
   7   3   3 1052.15   50.35
   7  -3   3  914.48   44.10
   7  -3   4  306.07   17.11
  -7  -3  -4  260.87   14.90
  -7  -3  -4  278.38   15.51
  -7   3  -4  296.16   16.51
   7   3   4  267.26   15.28
   7  -3   4  277.99   16.28
  -7  -3  -5  267.74   17.34
  -7   3  -5  293.81   18.70
  -7  -3  -5  339.05   21.43
  -7   3  -5  285.70   18.53
   7  -3   5  296.39   19.41
  -7  -3  -6   33.84    4.94
  -7   3  -6   34.46    4.74
  -7  -3  -6   32.47    4.84
  -7   3  -6   35.69    5.32
   7   3   6   34.51    4.81
   7  -3   6   35.95    5.44
  -7  -3  -7   43.21    6.52
  -7   3  -7   44.88    6.51
  -7  -3  -7   37.46    6.54
  -7   3  -7   42.91    6.85
   7   3   7   54.62    6.88
   7  -3   7   34.76    5.79
   7  -5  -9  130.62   12.96
   7   5  -9  120.43   11.81
  -7  -5   9   74.49    8.80
   7  -5  -8    1.94    1.94
   7   5  -8    2.07    2.07
  -7   5   8    2.05    1.41
  -7  -5   8    8.97    4.82
   7  -5  -7   37.50    3.89
   7  -5  -7   28.43    6.20
   7   5  -7   35.90    4.23
  -7   5   7   39.49    3.77
  -7  -5   7   38.43    5.60
   7  -5  -6  200.56   10.75
   7  -5  -6  261.13   14.15
   7   5  -6  218.72   11.77
  -7   5   6  190.32    9.73
  -7  -5   6  217.76   13.74
   7  -5  -5  304.36   10.13
   7  -5  -5  322.66   13.56
   7   5  -5  264.70    9.03
  -7   5   5  277.94    8.20
  -7  -5   5  261.44   11.92
   7  -5  -5  263.32    8.70
  -7  -5   4    4.83    0.51
   7  -5  -4    7.52    1.39
  -7  -5   4    3.44    0.51
   7  -5  -4    9.05    2.19
   7   5  -4    6.42    1.43
  -7   5   4    4.53    0.98
  -7  -5   4   25.09    4.28
   7  -5  -4    6.26    0.80
  -7  -5   3   42.94    2.32
   7  -5  -3   45.62    3.17
  -7  -5   3   57.60    3.00
   7  -5  -3   64.88    3.94
   7   5  -3   54.51    7.80
  -7  -5   3   50.97    2.87
  -7  -5   3   49.70    4.40
  -7  -5   2    3.39    0.84
   7  -5  -2    6.49    2.09
  -7  -5   2    2.95    0.73
   7   5  -2    3.58    0.82
  -7  -5   2    1.65    0.47
  -7  -5   2    4.27    1.99
   7  -5  -1  168.37    6.66
  -7  -5   1  163.99    6.08
  -7  -5   1  182.67    5.96
  -7  -5   1  173.30    5.26
  -7   5   1  163.69    5.91
   7   5  -1  147.96    6.50
   7  -5  -1  164.51    5.09
  -7   5   1  174.60    5.87
   7  -5   0  105.06    4.88
  -7  -5   0  118.00    5.04
  -7  -5   0  114.91    3.93
  -7  -5   0  111.56    3.84
  -7   5   0  138.91    5.52
   7   5   0  123.45    5.49
   7  -5   0  125.64    4.82
  -7   5   0  114.08    5.21
   7  -5   1  612.00   24.42
  -7  -5  -1  640.15   25.29
  -7  -5  -1  573.36   21.92
  -7   5  -1  589.39   22.98
   7   5   1  505.34   19.11
   7   5   1  602.52   24.52
   7  -5   1  565.62   22.41
   7  -5   2  725.66   21.85
  -7  -5  -2  708.38   21.36
  -7  -5  -2  661.93   18.99
  -7   5  -2  642.86   19.33
   7   5   2  726.39   22.11
   7  -5   2  698.88   21.18
   7  -5   3  138.30    8.52
  -7  -5  -3  128.68    8.03
  -7  -5  -3  122.11    7.18
  -7   5  -3  136.96    8.22
   7   5   3  141.05    8.61
   7  -5   3  119.07    7.69
   7  -5   4  102.67    6.09
  -7  -5  -4  131.92    7.59
  -7  -5  -4  106.78    6.10
  -7   5  -4  113.74    6.77
   7   5   4  110.77    6.75
   7  -5   4  124.27    7.45
   7  -5   5  393.93   31.48
  -7  -5  -5  362.37   29.39
  -7  -5  -5  333.58   26.75
  -7   5  -5  321.89   26.26
   7   5   5  404.65   32.57
   7  -5   5  432.06   34.93
  -7  -5  -6   76.58    8.37
  -7   5  -6   82.94    8.34
  -7  -5  -6   82.58    8.43
  -7   5  -6   75.13    8.23
   7   5   6   68.65    7.61
   7  -5   6   81.47    9.33
   7  -7  -9   79.95   20.97
   7   7  -9  111.81   11.46
  -7  -7   9  104.30   12.12
   7  -7  -8   25.14    3.71
   7  -7  -8   22.86    6.70
   7   7  -8   24.26    4.06
  -7  -7   8   37.11    7.08
   7  -7  -7   35.12    3.96
   7  -7  -7   49.84    7.90
   7   7  -7   32.52    3.71
  -7   7   7   46.54    3.76
  -7  -7   7   54.96    7.02
   7  -7  -6   17.56    2.35
   7  -7  -6   24.21    4.35
   7   7  -6   17.00    2.47
  -7   7   6   16.55    1.61
  -7  -7   6   17.16    4.16
   7  -7  -5  118.53    7.23
   7  -7  -5  143.22    8.31
   7   7  -5  124.31    7.05
  -7   7   5  127.30    7.06
  -7  -7   5  129.70    9.45
  -7  -7   4  464.37   12.99
   7  -7  -4  555.54   17.14
   7  -7  -4  600.59   18.42
   7   7  -4  544.53   16.23
   7  -7  -4  599.42   16.07
  -7  -7   4  504.90   17.91
   7  -7  -4  574.15   15.32
  -7  -7   3  402.12   17.23
   7  -7  -3  502.51   21.96
  -7  -7   3  463.72   19.49
   7  -7  -3  521.81   22.75
   7   7  -3  468.81   19.47
  -7  -7   3  429.41   17.99
  -7  -7   3  495.79   23.13
   7  -7  -2   31.08    2.65
  -7  -7   2   29.67    2.23
   7   7  -2   28.06    1.44
  -7  -7   2   27.68    1.61
  -7   7   2   27.06    2.02
  -7  -7   2   21.32    3.03
  -7  -7   1  497.43   19.82
  -7  -7   1  518.46   19.31
  -7  -7   1  509.74   18.92
   7   7  -1  582.95   24.26
   7  -7  -1  549.04   20.92
  -7   7   1  518.94   20.09
   7  -7   0  139.02    7.30
  -7  -7   0  169.96    8.70
  -7  -7   0  149.96    6.46
  -7  -7   0  145.68    6.26
   7   7   0  163.93    8.71
   7  -7   0  145.16    7.25
  -7   7   0  106.49    5.81
   7  -7   1  170.62    8.77
  -7  -7  -1  166.65    8.74
  -7  -7  -1  176.88    7.83
   7   7   1  167.05    7.23
   7   7   1  170.51    8.92
   7  -7   1  155.83    8.22
   7  -7   2 1308.94   62.10
  -7  -7  -2 1165.80   55.70
  -7  -7  -2 1199.08   56.04
  -7   7  -2 1180.92   55.98
   7  -7   2 1115.04   53.29
   7  -7   3  357.43   20.57
  -7  -7  -3  421.54   23.01
  -7  -7  -3  373.24   19.64
  -7   7  -3  394.93   21.31
   7   7   3  396.47   21.63
   7  -7   3  402.98   22.09
   7  -7   4  264.83   22.47
  -7  -7  -4  296.91   22.65
  -7  -7  -4  261.60   19.45
  -7   7  -4  260.78   19.82
   7   7   4  293.63   22.51
   7  -7   4  247.96   19.29
   7  -7   5  181.83   13.18
  -7  -7  -5  147.97   11.50
  -7  -7  -5  157.10   11.41
  -7   7  -5  175.66   13.30
   7   7   5  160.61   12.16
   7  -7   5  191.87   14.57
   7  -7   6   75.70   15.52
  -7  -7  -6  107.68   10.61
  -7  -7  -6   73.75   15.16
  -7   7  -6   72.04   12.36
   7   7   6  118.40   11.65
   7  -7   6   65.89   11.57
   7  -9  -8   18.27    3.53
   7  -9  -8   29.73    8.23
   7   9  -8   26.25    4.37
  -7  -9   8   23.89    6.67
   7  -9  -7   84.08    7.09
   7  -9  -7   93.11   17.38
   7   9  -7   95.73    7.50
  -7  -9   7   79.09    8.68
   7  -9  -6  117.34    9.91
   7  -9  -6  116.97    9.69
   7   9  -6  143.28   11.16
  -7  -9   6  113.17   11.79
   7  -9  -5  226.49   13.15
   7  -9  -5  221.60   13.54
   7   9  -5  202.04   11.10
  -7   9   5  201.38   10.85
  -7  -9   5  236.72   15.35
  -7  -9   4  781.14   36.51
   7  -9  -4  927.00   44.69
  -7  -9   4  906.15   42.37
   7  -9  -4 1059.75   50.35
   7   9  -4  935.57   43.85
   7  -9  -4  829.90   38.68
  -7  -9   4  906.93   45.41
   7  -9  -4  982.06   45.78
   7  -9  -3  186.26    7.94
  -7  -9   3  151.50    5.68
   7  -9  -3  157.33    6.06
   7   9  -3  160.72    5.62
  -7  -9   3  131.85    4.32
   7  -9  -3  140.39    4.13
   7  -9  -3  141.53    4.50
  -7  -9   3  147.78    8.81
   7  -9  -2   71.10    4.48
  -7  -9   2   82.30    4.27
  -7  -9   2   68.84    2.04
  -7  -9   2   68.83    1.96
  -7   9   2   91.87    4.66
   7  -9  -2   68.92    2.86
   7  -9  -2   67.12    2.94
  -7  -9   2   81.47    6.25
   7  -9  -1  481.26   15.54
  -7  -9   1  423.86   13.60
  -7   9   1  379.99   11.87
   7  -9  -1  420.36   12.60
   7   9  -1  480.11   16.21
   7  -9  -1  455.37   13.91
   7  -9   0 2160.04   58.89
  -7  -9   0 2201.25   59.98
  -7   9   0 2128.04   57.39
   7  -9   0 2177.65   59.02
   7  -9   1 1600.68   75.41
  -7  -9  -1 1704.58   80.38
  -7  -9  -1 1266.41   58.37
  -7  -9  -1 1565.27   72.25
  -7   9  -1 1567.82   73.50
   7   9   1 1678.47   79.70
   7  -9   1 1671.73   78.75
   7  -9   2  386.33   20.88
  -7  -9  -2  392.30   21.48
  -7  -9  -2  347.53   17.80
  -7   9  -2  391.45   21.06
   7   9   2  370.00   20.48
   7  -9   2  353.04   19.62
   7  -9   3   61.23   11.13
  -7  -9  -3   40.33    4.59
  -7  -9  -3   42.06    2.96
  -7   9  -3   40.62    3.84
   7   9   3   54.50    9.59
   7  -9   3   54.23    5.80
   7  -9   4   27.22    5.23
  -7  -9  -4   18.38    2.51
  -7   9  -4   22.21    3.35
   7   9   4   20.65    6.55
   7  -9   4   22.76    3.71
   7  -9   5  147.12   13.38
  -7  -9  -5  159.28   14.41
  -7  -9  -5  123.52   10.91
  -7   9  -5  140.29   12.70
   7   9   5  122.03   18.53
   7  -9   5  161.17   14.91
   7  -9   6    1.20    2.87
  -7  -9  -6    4.64    2.82
  -7   9  -6    2.88    2.72
   7   9   6    5.45    3.13
   7  -9   6    4.19    2.88
   7 -11  -8  100.61   10.30
   7 -11  -8  106.77   11.79
   7  11  -8  107.49   10.97
  -7 -11   8   87.22   11.40
   7 -11  -7   63.06    6.73
   7 -11  -7   71.29   14.29
   7  11  -7   62.86    6.31
  -7 -11   7   62.17    9.11
   7 -11  -6  309.40   25.37
   7 -11  -6  335.90   26.93
   7  11  -6  295.52   23.55
  -7 -11   6  355.30   31.02
   7 -11  -5   68.25    6.58
   7 -11  -5   76.27   14.83
   7  11  -5   65.20    5.42
  -7 -11   5   72.41    8.75
   7 -11  -4  798.94   41.49
  -7 -11   4  768.64   38.60
   7 -11  -4  929.79   47.47
   7  11  -4  800.57   40.18
  -7 -11   4  758.26   41.21
   7 -11  -4  762.94   38.39
   7 -11  -3  311.42   16.94
  -7 -11   3  287.92   14.64
   7  11  -3  256.88   12.20
  -7  11   3  213.27   11.03
   7 -11  -3  245.33   12.41
  -7 -11   3  255.62   16.17
  -7 -11   2   49.97    3.84
  -7  11   2   47.82    3.61
   7 -11  -2   51.07    3.75
  -7 -11   2   43.82    5.67
   7 -11  -1  135.89    8.60
  -7 -11   1  159.25    9.60
  -7  11   1  139.13    7.82
   7 -11  -1  126.84    7.59
   7 -11   0  233.68   13.13
  -7 -11   0  247.97   13.68
  -7  11   0  250.51   13.12
   7  11   0  276.78   15.50
   7 -11   0  230.84   12.84
   7 -11   1   22.06    3.56
  -7 -11  -1   20.93    3.25
  -7  11  -1   18.03    2.39
   7  11   1   17.04    3.90
   7 -11   1   20.78    3.17
   7 -11   2  126.73   19.35
  -7 -11  -2  121.16   10.44
  -7  11  -2  130.71   10.62
   7  11   2  114.30   21.32
   7 -11   2  123.77   10.77
   7 -11   3   42.35    6.69
  -7 -11  -3   47.80    5.02
  -7  11  -3   40.06    4.44
   7  11   3   29.76    7.05
   7 -11   3   23.46    4.11
   7 -11   4  113.72   21.01
  -7 -11  -4  138.75   11.84
  -7  11  -4  136.58   11.20
   7  11   4  127.09   10.99
   7 -11   4  130.31   11.58
   7 -11   5   29.25    8.95
  -7 -11  -5   20.49    4.53
  -7  11  -5   26.56    5.61
   7  11   5   16.76    4.83
   7 -11   5   36.81    7.65
   7 -13  -7   78.86    8.78
   7 -13  -7  135.75   12.38
  -7 -13   7   62.96   12.39
   7 -13  -6   44.02    5.76
   7 -13  -6   36.74    7.50
  -7 -13   6   55.98    9.71
   7 -13  -5  557.25   44.12
   7 -13  -5  479.36   39.48
  -7 -13   5  467.39   38.92
   7 -13  -4  173.82   12.34
  -7 -13   4  159.33   10.21
   7 -13  -4  145.23    9.67
  -7 -13   4  134.02   11.34
   7 -13  -3  364.12   27.15
  -7 -13   3  335.45   24.46
  -7  13   3  380.17   27.58
  -7 -13   3  361.97   28.64
   7 -13  -2  307.88   14.16
  -7 -13   2  309.79   13.29
  -7  13   2  279.89   11.83
   7 -13  -2  263.19   11.90
  -7 -13   2  331.62   18.10
   7 -13  -1   47.17    4.51
  -7 -13   1   44.04    3.91
  -7  13   1   43.35    3.21
   7 -13  -1   39.88    3.79
  -7 -13   1   58.64    6.53
   7 -13   0   37.60    4.56
  -7 -13   0   42.41    4.82
  -7  13   0   48.64    4.64
   7  13   0   47.74   11.06
   7 -13   0   57.16    5.98
   7 -13   1  128.92    9.37
  -7 -13  -1  141.57   10.38
  -7  13  -1  127.64    9.20
   7  13   1  148.40   11.10
   7 -13   1  132.31   10.08
   7 -13   2   55.69    6.27
  -7 -13  -2   55.06    5.64
  -7  13  -2   57.94    5.19
   7  13   2   50.80   16.42
   7 -13   2   53.82    6.82
   7 -13   3   71.82   16.10
  -7 -13  -3   74.51    7.60
  -7  13  -3   77.89    7.25
   7  13   3   54.26   13.50
   7 -13   3   78.90    8.10
   7 -13   4   38.84   13.17
  -7 -13  -4   42.06    8.03
  -7  13  -4   53.31    9.29
   7  13   4   47.79   18.25
   7 -13   4   63.57   11.49
   7 -15  -6    6.49    3.43
  -7 -15   6    8.69    6.04
   7 -15  -5   82.37    8.69
   7 -15  -5   85.84    7.97
  -7 -15   5   79.95   10.45
   7 -15  -4   37.44    5.52
  -7  15   4   38.48    4.99
  -7 -15   4   45.95    8.08
   7 -15  -3  364.78   25.00
  -7 -15   3  389.22   25.52
  -7  15   3  382.55   24.84
  -7 -15   3  395.62   29.01
   7 -15  -2  577.55   45.83
  -7 -15   2  611.43   47.91
  -7  15   2  513.50   40.02
  -7 -15   2  479.85   40.14
   7 -15  -1   35.77    4.62
  -7 -15   1   37.69    4.20
  -7  15   1   34.78    3.51
   7 -15  -1   42.05    4.70
  -7 -15   1   26.87    5.51
   7 -15   0  136.92   10.59
  -7 -15   0  130.82   10.30
  -7  15   0  125.79    9.34
   7  15   0  135.72   11.22
   7 -15   0  146.83   11.75
   7 -15   1   49.99    6.29
  -7 -15  -1   49.47    6.48
  -7  15  -1   54.91    6.92
   7  15   1   38.16    9.85
   7 -15   1   35.16    5.55
   7 -15   2    1.61    1.97
  -7 -15  -2    5.27    2.46
  -7  15  -2    1.90    1.92
   7  15   2    4.67    4.42
   7 -15   2    4.84    2.89
   7 -15   3  123.43   18.33
  -7 -15  -3  134.69   12.83
  -7  15  -3  140.25   12.77
   7  15   3  112.43   18.16
   7 -15   3  141.17   13.97
   7 -17  -5   12.40    4.80
  -7  17   5    8.00    2.13
  -7 -17   5   17.46    7.74
   7 -17  -4   49.05    8.89
  -7  17   4   39.09    6.68
  -7 -17   4   62.03   12.44
  -7 -17   3   14.11    3.43
  -7 -17   3   24.38    6.55
   7 -17  -2   42.83    6.90
  -7 -17   2   35.16    5.30
  -7  17   2   33.28    4.75
  -7 -17   2   25.47    5.85
   7 -17  -1   34.04    5.80
  -7 -17   1   26.03    4.54
  -7  17   1   26.06    4.02
   7 -17   0   37.96    6.00
  -7 -17   0   31.99    5.49
  -7  17   0   36.24    5.22
  -7 -17   0   28.87    6.41
   7 -17   1   58.35   10.08
  -7 -17  -1   75.92   15.77
  -7  17  -1   72.15   11.98
   7  17   1   61.40   10.81
   7 -17   2   26.80    4.78
  -7 -17  -2   25.29    4.98
  -7  17  -2   26.78    4.79
   7  17   2   20.37    8.78
   7 -17   2   31.74    7.54
   7 -19  -2   63.61    7.51
  -7 -19   2   57.87    6.62
  -7  19   2   41.27    5.71
  -7 -19   2   49.35    9.08
   7 -19  -1   32.00    6.35
  -7 -19   1   21.12    4.31
  -7  19   1   17.78    3.28
  -7 -19   1   18.34    5.47
   8   0  -9    0.12    2.33
  -8   0   9    1.99    2.33
   8   0  -8 1079.05   68.32
  -8   0   8  985.07   76.44
   8   0  -7    3.33    2.98
  -8   0   7    5.94    2.46
   8   0  -6 1258.25   58.17
  -8   0   6 1234.66   57.12
   8   0  -6 1367.85   64.62
  -8   0   6 1267.52   60.26
   8   0  -5    1.49    0.86
  -8   0   5    0.79    0.64
   8   0  -5    2.82    1.13
  -8   0   5    6.10    1.99
   8   0  -4  690.84   26.18
  -8   0   4  680.77   25.78
   8   0  -4  684.58   26.88
  -8   0   4  639.21   24.38
  -8   0   4  660.28   26.00
   8   0  -3    1.43    0.98
  -8   0   3    2.69    1.12
   8   0  -3    1.06    0.90
  -8   0   3    0.36    0.33
  -8   0   3    4.43    1.57
   8   0  -2 1006.34   28.32
   8   0  -2  904.23   25.32
   8   0  -2  986.59   27.62
  -8   0   2 1011.42   27.84
   8   0  -1    1.63    1.37
  -8   0   1    3.29    1.51
   8   0  -1    1.80    1.22
  -8   0   1    2.13    0.96
   8   0   0 1016.58   29.39
  -8   0   0 1099.04   30.65
   8   0   0 1094.95   30.76
   8   0   1    1.38    1.49
  -8   0  -1    6.43    1.98
   8   0   1    2.05    1.25
   8   0   2 1207.65   34.21
  -8   0  -2 1121.82   31.57
   8   0   2 1125.30   31.92
  -8   0  -3    1.00    1.66
  -8   0  -3    1.24    1.63
   8   0   3    1.70    1.58
  -8   0  -4  746.49   29.39
  -8   0  -4  717.02   28.17
   8   0   4  795.61   30.98
  -8   0  -5    1.31    1.83
  -8   0  -5    0.23    2.00
   8   0   5    6.90    3.06
  -8   0  -6   30.82    5.18
  -8   0  -6   22.49    4.38
   8   0   6   19.47    4.38
   8   2  -9   79.68    8.49
  -8   2   9   78.79    7.89
  -8  -2   9   92.73    9.75
   8   2  -8   37.50    4.24
  -8   2   8   29.62    3.80
  -8  -2   8   18.97    3.38
   8  -2  -7  267.51   10.48
   8  -2  -7  266.69   12.74
   8   2  -7  267.55   12.09
  -8   2   7  242.22   10.63
  -8  -2   7  270.59   13.30
   8  -2  -6  313.50   15.36
   8  -2  -6  277.95   15.70
   8   2  -6  308.76   16.03
  -8   2   6  264.56   13.53
  -8  -2   6  276.53   15.45
   8  -2  -5   94.75    3.86
  -8  -2   5   92.25    2.90
  -8   2   5   88.22    3.76
  -8  -2   5   91.39    2.81
   8  -2  -5  106.20   14.67
   8   2  -5  110.97   12.54
  -8   2   5  100.36    4.08
  -8  -2   5   90.72    5.38
   8  -2  -5   94.88    4.82
   8   2  -4 1474.04   54.55
   8  -2  -4 1424.77   53.07
  -8  -2   4 1369.61   50.68
   8  -2  -4 1548.13   58.31
   8   2  -4 1486.40   56.11
  -8   2   4 1324.56   49.04
  -8   2   4 1380.28   51.22
  -8  -2   4 1321.75   50.66
   8   2  -3   90.00    6.58
   8  -2  -3   85.96    3.80
  -8  -2   3   86.74    3.43
   8  -2  -3   95.55    4.36
   8   2  -3   84.05    3.73
  -8  -2   3   73.95    3.91
  -8   2   3   80.52    2.59
  -8   2   3   81.29    3.07
  -8  -2   3   75.82    4.19
   8   2  -2  570.85   16.96
   8  -2  -2  598.07   17.78
   8   2  -2  505.11   14.56
   8   2  -2  600.77   18.16
   8  -2  -2  591.04   16.42
  -8  -2   2  571.42   16.67
  -8   2   2  560.92   15.60
   8   2  -1  378.35   11.94
   8  -2  -1  326.07   11.47
  -8  -2   1  304.21    9.13
  -8   2   1  311.67    9.75
   8   2  -1  329.70   10.67
   8  -2  -1  326.98   10.34
  -8   2   1  317.30    9.72
   8   2   0 2496.60   92.74
  -8  -2   0 2545.12   93.74
  -8   2   0 2659.82  107.27
   8   2   0 2710.64  109.60
   8  -2   0 2764.04  111.30
  -8   2   0 2383.63   88.57
   8  -2   1  973.15   37.64
  -8  -2  -1 1035.47   39.73
  -8  -2  -1 1012.31   38.29
  -8   2  -1 1077.36   40.87
   8   2   1 1002.41   38.38
   8  -2   1  985.56   37.49
   8  -2   2 3566.26  166.31
  -8  -2  -2 3531.96  163.92
  -8  -2  -2 3474.32   91.89
  -8   2  -2 3840.06  177.88
   8   2   2 3327.18   88.83
   8  -2   2 3442.90   91.65
   8  -2   3  323.37   17.08
  -8  -2  -3  330.25   17.50
  -8  -2  -3  318.74   16.46
  -8   2  -3  313.14   16.48
   8   2   3  308.00   16.28
   8  -2   3  307.50   16.33
   8  -2   4  142.52   11.59
  -8  -2  -4  120.97   10.35
  -8  -2  -4  141.51   11.58
  -8   2  -4  154.68   12.40
   8   2   4  155.84   12.63
   8  -2   4  139.54   11.45
  -8  -2  -5    3.83    1.90
  -8   2  -5    2.10    2.78
  -8  -2  -5    6.52    2.88
  -8   2  -5    4.20    2.19
   8   2   5    0.63    2.39
   8  -2   5    6.70    2.84
  -8  -2  -6   40.30    7.66
  -8   2  -6   37.19    6.93
  -8  -2  -6   39.38    7.24
  -8   2  -6   38.76    7.24
   8   2   6   42.62    7.84
   8  -2   6   28.82    6.04
   8  -4  -9    1.25    2.25
   8   4  -9    1.89    2.19
  -8  -4   9   13.39    4.24
   8  -4  -8   50.02    9.33
   8   4  -8   65.10    6.17
  -8   4   8   61.37    5.15
  -8  -4   8   56.57    6.52
   8  -4  -7  205.61   15.21
   8  -4  -7  195.10   26.30
   8   4  -7  193.16   14.89
  -8   4   7  192.88   14.34
  -8  -4   7  195.69   16.25
   8  -4  -6  359.31   17.91
   8  -4  -6  356.23   19.02
   8   4  -6  333.95   17.36
  -8  -4   6  337.45   19.00
   8  -4  -5   82.98    4.14
   8  -4  -5   89.99    4.57
   8   4  -5   68.30   10.08
  -8   4   5   72.29    2.72
  -8  -4   5   85.12    6.08
   8  -4  -5   69.48    3.30
   8  -4  -4  810.48   33.75
  -8  -4   4  738.38   30.00
  -8  -4   4  740.58   30.14
   8  -4  -4  672.24   29.02
   8   4  -4  813.10   33.82
  -8  -4   4  626.35   27.62
  -8  -4   3   42.89    6.06
   8  -4  -3   46.86    3.02
  -8  -4   3   46.71    2.61
   8  -4  -3   58.82   10.83
   8   4  -3   52.86    4.25
  -8  -4   3   48.64    4.09
   8  -4  -2 1137.91   43.04
  -8  -4   2 1185.81   44.53
  -8  -4   2 1048.07   39.15
  -8  -4   2  880.27   32.67
  -8   4   2  968.22   36.34
   8   4  -2 1025.99   39.26
   8  -4  -1    4.42    0.97
  -8  -4   1    5.39    1.20
  -8  -4   1    4.16    0.83
  -8  -4   1    3.46    0.56
  -8   4   1    3.70    0.87
   8   4  -1    5.59    1.97
   8  -4  -1    4.06    0.66
  -8   4   1    6.45    1.08
   8  -4   0  461.99   19.95
  -8  -4   0  549.45   21.93
  -8  -4   0  368.20   14.13
  -8  -4   0  481.33   18.47
  -8   4   0  561.69   21.99
   8   4   0  468.52   19.13
   8  -4   0  489.32   19.01
  -8   4   0  420.52   17.20
   8  -4   1   80.28   10.49
  -8  -4  -1   80.03    5.01
  -8  -4  -1   56.83    3.32
  -8   4  -1   75.43    4.54
   8   4   1   72.21    9.91
   8  -4   1   74.99    4.45
   8  -4   2 1204.01   58.62
  -8  -4  -2 1162.38   55.39
  -8  -4  -2 1086.10   51.14
  -8   4  -2 1080.38   51.32
   8   4   2 1031.36   49.28
   8  -4   2 1101.54   52.43
   8  -4   3  446.78   27.02
  -8  -4  -3  452.62   24.25
  -8  -4  -3  481.16   25.14
  -8   4  -3  475.34   25.36
   8   4   3  459.78   24.65
   8  -4   3  493.03   26.28
   8  -4   4   95.14   12.13
  -8  -4  -4  128.22   10.81
  -8  -4  -4  125.44   10.12
  -8   4  -4  112.73    9.56
   8   4   4  120.11   10.06
   8  -4   4  104.95    9.23
   8  -4   5   24.68    3.60
  -8  -4  -5   30.17    4.19
  -8  -4  -5   26.44    4.21
  -8   4  -5   27.65    3.84
   8   4   5   18.91    3.50
   8  -4   5   18.77    3.83
  -8  -4  -6   81.46    8.73
  -8   4  -6   76.03   15.67
  -8  -4  -6   97.80    9.59
  -8   4  -6   82.69    8.78
   8  -4   6   98.07    9.97
   8  -6  -9   30.43    8.96
   8   6  -9   36.91    7.03
  -8  -6   9   36.08    8.32
   8  -6  -8  152.98   13.17
   8   6  -8  147.28   11.81
  -8  -6   8  154.25   14.04
   8  -6  -7   63.09    4.95
   8  -6  -7   64.28   15.23
   8   6  -7   69.72    5.55
  -8  -6   7   60.12    7.46
   8  -6  -6  233.36   12.95
   8  -6  -6  255.00   14.58
   8   6  -6  202.77   11.50
  -8   6   6  214.77   11.20
  -8  -6   6  247.39   16.32
   8  -6  -5  456.72   22.62
   8  -6  -5  376.10   19.86
   8   6  -5  430.29   21.21
  -8   6   5  370.96   17.41
  -8  -6   5  441.20   23.74
   8  -6  -5  360.17   17.12
  -8  -6   4  436.01   12.50
   8  -6  -4  468.15   14.73
  -8  -6   4  470.61   13.17
   8  -6  -4  505.19   15.63
   8   6  -4  473.21   14.18
  -8  -6   4  423.36   15.56
  -8  -6   3   69.19    3.95
   8  -6  -3   77.19    5.05
  -8  -6   3   85.02    4.44
   8  -6  -3   70.27    4.04
   8   6  -3   74.24    3.97
  -8  -6   3   75.05    4.03
  -8  -6   3   97.97    6.81
   8  -6  -2   23.80    2.37
  -8  -6   2   18.31    1.91
  -8  -6   2   14.96    1.25
  -8   6   2   20.94    2.04
  -8  -6   2   14.12    0.96
   8   6  -2   26.66    2.85
   8  -6  -1  338.53   15.27
  -8  -6   1  408.14   17.89
  -8  -6   1  359.50   14.94
  -8  -6   1  369.78   15.25
  -8   6   1  357.21   15.55
   8   6  -1  397.71   17.98
   8  -6  -1  373.33   15.52
  -8   6   1  324.40   13.93
   8  -6   0   74.90    7.75
  -8  -6   0   43.75    3.31
  -8  -6   0   39.40    2.33
  -8  -6   0   43.79    2.46
  -8   6   0   33.83    2.60
   8   6   0   68.95    8.06
   8  -6   0   56.34    3.53
  -8   6   0   47.93    4.00
   8  -6   1  174.50    7.47
  -8  -6  -1  188.00    7.82
  -8  -6  -1  159.47    5.49
  -8   6  -1  146.85    5.95
   8   6   1  148.19    4.96
   8   6   1  178.92    7.56
   8  -6   1  174.03    7.03
   8  -6   2  233.82   12.80
  -8  -6  -2  235.61   13.04
  -8  -6  -2  223.38   11.51
  -8   6  -2  215.79   11.82
   8   6   2  220.52   12.23
   8  -6   2  199.86   11.23
   8  -6   3  101.88   12.38
  -8  -6  -3  121.71    7.36
  -8  -6  -3   99.73    5.31
  -8   6  -3  108.79    6.43
   8   6   3  129.14    7.34
   8  -6   3  119.51    7.03
   8  -6   4  146.54   10.28
  -8  -6  -4  179.26   12.77
  -8  -6  -4  187.48   12.26
  -8   6  -4  170.94   11.83
   8  -6   4  187.91   13.20
   8  -6   5   63.05    7.93
  -8  -6  -5   50.75    6.50
  -8  -6  -5   40.25    4.97
  -8   6  -5   47.51    6.32
   8   6   5   54.49    6.82
   8  -6   5   50.19    6.35
  -8  -6  -6  157.82   15.57
  -8  -6  -6  130.43   12.71
  -8   6  -6  171.21   16.66
   8   6   6  167.20   16.39
   8  -6   6  189.92   18.59
   8  -8  -9    7.71    2.60
   8   8  -9    7.04    2.47
  -8  -8   9   21.23    6.72
   8  -8  -8   82.11    8.17
   8  -8  -8   91.98   22.04
   8   8  -8   80.91    7.83
  -8  -8   8   79.11   10.32
   8  -8  -7  167.02   14.10
   8  -8  -7  128.50   11.52
   8   8  -7  138.84   11.85
  -8  -8   7  119.28   12.27
   8  -8  -6  102.56    8.59
   8  -8  -6   82.39   15.68
   8   8  -6   84.77    7.24
  -8  -8   6  110.03   12.13
   8  -8  -5  330.78   18.09
   8  -8  -5  369.41   20.56
   8   8  -5  335.88   17.66
  -8  -8   5  297.41   18.56
  -8  -8   4  459.09   21.83
   8  -8  -4  546.77   27.14
  -8  -8   4  514.93   24.46
   8  -8  -4  529.60   26.19
   8   8  -4  474.32   22.76
  -8  -8   4  475.50   25.55
   8  -8  -3  326.38   11.42
  -8  -8   3  287.03    9.26
   8  -8  -3  248.45    8.64
   8   8  -3  297.03    9.15
  -8  -8   3  239.84    7.41
  -8  -8   3  353.81   14.60
   8  -8  -2   57.24    4.20
  -8  -8   2   66.12    3.72
  -8  -8   2   52.47    2.06
  -8  -8   2   49.86    1.78
  -8   8   2   58.48    3.36
  -8  -8   2   50.35    4.31
  -8  -8   1  367.59   12.18
  -8  -8   1  355.96    9.68
  -8  -8   1  342.77    9.26
  -8   8   1  344.33   10.97
   8   8  -1  366.32   13.37
   8  -8  -1  327.16    9.77
  -8   8   1  390.54   11.95
   8  -8   0  553.27   17.31
  -8  -8   0  541.49   17.23
  -8  -8   0  537.65   14.60
  -8  -8   0  536.26   14.52
   8   8   0  597.29   19.14
   8  -8   0  557.83   16.56
   8  -8   1   23.58    3.75
  -8  -8  -1   17.79    2.66
  -8  -8  -1   24.39    1.83
   8   8   1   28.82    6.38
   8  -8   1   18.26    2.29
   8  -8   2  506.97   29.18
  -8  -8  -2  472.09   25.54
  -8  -8  -2  452.64   23.13
  -8   8  -2  468.68   24.86
   8   8   2  440.33   23.91
   8  -8   2  495.42   26.39
   8  -8   3   75.39   14.73
  -8  -8  -3   66.04    6.64
  -8  -8  -3   48.16    4.43
  -8   8  -3   60.83    6.04
   8   8   3   69.55   11.61
   8  -8   3   58.98    5.95
   8  -8   4  103.29    8.73
  -8  -8  -4   91.98    7.05
  -8   8  -4   77.16    6.83
   8   8   4   86.60   19.20
   8  -8   4   95.25    8.77
   8  -8   5  111.35   11.24
  -8  -8  -5  109.41   11.19
  -8  -8  -5  106.78   10.32
  -8   8  -5  107.74   10.96
   8   8   5   93.76   22.80
   8  -8   5   85.31    9.49
   8 -10  -8  131.73   12.07
   8 -10  -8  124.79   12.14
   8  10  -8  103.92    9.75
  -8 -10   8  131.61   15.20
   8 -10  -7   77.34    7.15
   8 -10  -7   83.17   11.89
   8  10  -7   73.41    6.69
  -8 -10   7   64.24    9.13
   8 -10  -6  105.10    9.97
   8 -10  -6  111.04   19.59
   8  10  -6   88.86    6.50
  -8 -10   6   75.45    8.86
   8 -10  -5  259.94   19.68
   8 -10  -5  293.85   21.85
   8  10  -5  245.30   18.16
  -8 -10   5  240.08   20.44
   8 -10  -4  103.37    7.14
  -8 -10   4  110.03    6.37
   8 -10  -4   93.00    5.98
   8  10  -4  104.42    5.98
  -8 -10   4  120.61    9.52
   8 -10  -3  526.36   26.67
  -8 -10   3  545.73   26.59
   8  10  -3  533.32   25.30
  -8  10   3  386.34   19.07
  -8 -10   3  558.55   30.27
   8 -10  -2  110.62    7.48
  -8 -10   2   77.70    5.27
  -8  10   2   87.64    5.60
   8 -10  -2   71.82    4.00
  -8 -10   2   84.04    7.35
   8 -10  -1 1014.75   48.99
  -8 -10   1  960.30   46.24
  -8  10   1  924.47   44.20
   8  10  -1 1059.36   51.77
   8 -10  -1  916.78   43.46
   8 -10   0  184.41   11.15
  -8 -10   0  202.76   11.52
  -8  10   0  195.24   10.61
   8  10   0  215.01   13.05
   8 -10   0  197.57   10.80
   8 -10   1 1060.82   53.98
  -8 -10  -1  899.27   46.34
  -8  10  -1  918.97   46.65
   8 -10   1  920.89   47.12
   8 -10   2  266.09   21.75
  -8 -10  -2  259.07   20.21
  -8  10  -2  307.74   22.89
   8  10   2  283.19   22.12
   8 -10   2  266.40   20.33
   8 -10   3   66.93   12.56
  -8 -10  -3   37.55    4.52
  -8  10  -3   69.75    6.26
   8  10   3   49.69   12.07
   8 -10   3   64.13    5.92
   8 -10   4  132.16   15.04
  -8 -10  -4  137.34   12.85
  -8  10  -4  110.83   10.38
   8  10   4  108.24   25.10
   8 -10   4  112.21   11.01
   8 -10   5  230.42   21.77
  -8 -10  -5  198.81   18.91
  -8  10  -5  186.57   17.73
   8  10   5  204.23   19.48
   8 -10   5  197.40   19.18
   8 -12  -7   43.24    6.62
   8 -12  -7   48.28   15.09
  -8 -12   7   56.42    9.18
   8 -12  -6   16.62    3.56
   8 -12  -6   16.86    7.16
  -8 -12   6   41.45    7.59
   8 -12  -5  300.59   24.69
   8 -12  -5  335.23   29.73
  -8 -12   5  309.09   27.67
   8 -12  -4  394.90   29.39
  -8 -12   4  361.14   26.01
  -8 -12   4  296.50   24.11
   8 -12  -3  223.40   11.36
  -8 -12   3  204.90    9.19
  -8  12   3  196.32    9.16
  -8 -12   3  181.90   11.80
  -8 -12   2  144.74    7.34
  -8  12   2  176.58    8.14
   8 -12  -2  144.85    6.72
  -8 -12   2  150.26   10.76
   8 -12  -1  311.33   14.12
  -8 -12   1  419.92   17.50
  -8  12   1  423.09   16.81
   8 -12  -1  453.57   18.17
   8 -12   0   46.93    5.11
  -8 -12   0   47.05    5.19
  -8  12   0   55.94    5.20
   8  12   0   64.92   15.82
   8 -12   0   45.37    4.67
   8 -12   1  775.99   46.33
  -8 -12  -1  688.30   41.55
  -8  12  -1  745.18   44.35
   8  12   1  595.04   36.55
   8 -12   1  709.05   42.52
   8 -12   2   61.88   10.86
  -8 -12  -2   56.84    6.00
  -8  12  -2   61.67    5.58
   8  12   2   46.26   10.02
   8 -12   2   48.01    5.12
   8 -12   3  148.35   12.13
  -8 -12  -3  148.97   12.65
  -8  12  -3  125.86   10.59
   8  12   3  101.26   25.26
   8 -12   3  154.29   12.95
   8 -12   4  135.87   12.89
  -8 -12  -4  125.45   12.21
  -8  12  -4  125.34   11.84
   8  12   4  162.60   15.18
   8 -12   4  134.56   13.76
   8 -14  -7   39.04    6.26
   8 -14  -7   32.69   16.85
  -8 -14   7   60.70    9.92
   8 -14  -6  202.42   17.93
   8 -14  -6  330.45   27.68
  -8 -14   6  265.14   25.76
   8 -14  -5   27.05    4.71
   8 -14  -5   32.78    4.13
  -8 -14   5   38.49    7.68
   8 -14  -4   41.03    4.87
  -8  14   4   16.96    2.37
  -8 -14   4   35.32    5.50
   8 -14  -3    8.12    3.81
  -8 -14   3    3.53    1.85
  -8  14   3    7.44    1.70
  -8 -14   3   19.66    5.80
  -8 -14   2  342.27   27.48
  -8  14   2  352.40   27.82
  -8 -14   2  349.37   30.39
   8 -14  -1  121.56   11.10
  -8 -14   1  119.68   10.74
  -8  14   1  124.70   10.86
  -8 -14   1  151.04   14.48
   8 -14   0    6.74    2.89
  -8 -14   0   13.97    2.83
  -8  14   0    7.72    2.72
   8  14   0   12.40    3.53
   8 -14   0    9.37    3.52
   8 -14   1    7.25    2.19
  -8 -14  -1   22.85    3.59
  -8  14  -1   16.82    2.95
   8  14   1   12.22    2.98
   8 -14   1   15.87    3.03
   8 -14   2   14.20    3.66
  -8 -14  -2   25.78    4.58
  -8  14  -2   15.56    2.77
   8 -14   2   13.76    3.90
   8 -14   3  278.48   23.74
  -8 -14  -3  272.81   23.83
  -8  14  -3  272.76   23.24
   8  14   3  221.24   19.81
   8 -16  -5  107.66   11.40
  -8  16   5  108.75   10.20
  -8 -16   5  129.69   16.87
   8 -16  -4   42.06    6.70
  -8 -16   4   36.65    7.90
   8 -16  -3  107.56   10.81
  -8 -16   3   86.02    8.04
  -8  16   3   86.54    7.89
  -8 -16   3   99.25   12.50
   8 -16  -2   64.83    7.78
  -8 -16   2   58.07    8.11
  -8  16   2   57.91    7.62
  -8 -16   2   65.00    9.58
   8 -16  -1   16.72    3.75
  -8 -16   1   25.21    4.08
  -8  16   1   35.91    4.93
  -8 -16   1   37.47    7.39
   8 -16   0   10.41    3.67
  -8 -16   0    8.98    3.42
  -8  16   0    9.44    2.30
  -8 -16   0   15.22    5.41
   8 -16   1  113.55   11.00
  -8 -16  -1  137.49   13.11
  -8  16  -1  129.43   12.02
   8  16   1  139.05   14.27
   8 -16   2    9.22    4.97
  -8 -16  -2   15.22    4.30
  -8  16  -2   16.31    4.45
   8  16   2   14.72    7.62
  -8  18   3  114.13    9.86
  -8 -18   3  118.05   14.17
   8 -18  -2    3.54    3.12
  -8 -18   2    1.19    1.84
  -8  18   2    0.45    1.61
  -8 -18   2    2.07    4.62
   8 -18  -1   41.34    6.57
  -8 -18   1   58.22    6.69
  -8  18   1   32.76    5.11
  -8 -18   1   37.93    8.08
   8 -18   0   11.39    3.39
  -8 -18   0    4.58    2.56
  -8  18   0   12.04    3.31
  -8 -18   0   15.65    6.37
   9  -1  -9  146.55   13.83
   9   1  -9  116.68   14.41
  -9  -1   9  115.60   11.32
   9   1  -8   17.28    5.59
   9  -1  -8   20.97    8.04
  -9   1   8   13.15    2.60
  -9  -1   8   13.05    2.84
   9  -1  -7  284.80   22.76
   9   1  -7  284.29   21.66
  -9   1   7  303.50   22.44
  -9  -1   7  312.46   23.59
   9   1  -6    6.27    0.99
   9  -1  -6    7.47    3.33
   9   1  -6    3.26    1.32
   9  -1  -6    4.76    1.51
  -9   1   6   10.94    1.94
   9   1  -5  900.39   24.54
   9  -1  -5  864.97   25.02
  -9  -1   5  835.32   22.65
  -9   1   5  770.16   21.40
   9   1  -5  914.21   29.05
   9  -1  -5 1003.39   28.98
  -9   1   5  775.49   22.49
  -9   1   5  858.00   24.52
  -9  -1   5  842.53   25.32
   9  -1  -4    0.53    1.06
  -9  -1   4    2.32    1.14
   9   1  -4    3.22    2.39
   9  -1  -4    2.46    1.26
  -9  -1   4    0.65    1.09
  -9   1   4    1.13    0.70
  -9   1   4    5.05    1.63
  -9  -1   4    2.95    1.51
   9   1  -3 2119.57   79.28
   9  -1  -3 2027.48   75.87
   9   1  -3 2285.48   84.93
   9  -1  -3 2246.33   83.82
  -9  -1   3 1875.64   69.51
  -9   1   3 1977.94   72.73
  -9   1   3 1896.48   70.39
  -9  -1   3 2119.96   79.41
   9   1  -2 1136.84   43.15
   9  -1  -2 1049.16   41.21
  -9  -1   2  949.88   35.52
  -9   1   2  925.18   34.76
   9  -1  -2 1199.71   44.91
   9   1  -2 1198.26   45.16
  -9  -1   2 1086.29   40.73
  -9   1   2 1120.26   41.67
   9   1  -1  727.08   28.17
   9  -1  -1  654.19   25.71
  -9   1   1  610.83   23.46
  -9  -1   1  582.69   22.26
   9   1  -1  616.40   25.21
   9  -1  -1  624.21   24.54
  -9   1   1  596.15   22.96
   9   1   0   84.47   10.37
   9  -1   0   78.48    5.17
  -9   1   0   60.39    3.60
  -9  -1   0   57.48    3.35
   9   1   0  104.98   11.64
   9  -1   0   67.97    3.97
   9  -1   1  471.52   15.71
  -9  -1  -1  470.75   14.38
  -9   1  -1  426.19   13.33
   9   1   1  498.18   15.50
   9  -1   1  463.95   14.41
   9  -1   2   37.28    5.90
  -9  -1  -2   27.92    2.83
  -9  -1  -2   33.15    2.97
  -9   1  -2   23.22    2.70
   9   1   2   26.78    2.76
   9  -1   2   21.43    2.64
   9  -1   3  194.67    9.72
  -9  -1  -3  202.33    9.93
  -9  -1  -3  202.92    9.59
  -9   1  -3  210.01   10.04
   9   1   3  218.67   10.35
   9  -1   3  190.26    9.24
  -9  -1  -4    5.49    3.76
  -9   1  -4    4.91    2.28
  -9  -1  -4    3.44    1.88
  -9   1  -4    6.41    2.24
   9   1   4    5.42    1.98
   9  -1   4    1.32    1.84
  -9  -1  -5   14.26    3.66
  -9   1  -5   24.37    3.88
  -9   1  -5   26.85    4.19
  -9  -1  -5   22.19    3.75
   9   1   5   28.75    4.41
   9  -1   5   14.84    3.06
  -9  -1  -6   26.03    6.34
  -9   1  -6   20.18    5.04
  -9  -1  -6   26.34    6.48
  -9   1  -6   34.26    7.95
   9   1   6   31.25    7.52
   9  -1   6   18.36    5.23
   9  -3  -9    0.01    1.69
   9   3  -9    2.84    1.99
  -9  -3   9    6.16    3.40
   9   3  -8  104.43    8.27
  -9  -3   8  125.29   10.94
   9  -3  -7  185.25   13.64
   9   3  -7  182.35   25.77
  -9   3   7  178.24   13.41
  -9  -3   7  203.49   16.68
   9  -3  -6  178.53    9.82
   9  -3  -6  184.99   12.88
   9   3  -6  192.14   11.13
  -9   3   6  184.05    9.92
  -9  -3   6  167.47   11.26
   9  -3  -5  490.01   23.65
  -9  -3   5  504.34   23.54
  -9  -3   5  506.50   23.63
   9  -3  -5  570.12   27.90
   9   3  -5  523.75   26.74
  -9   3   5  461.21   21.88
  -9   3   5  510.30   23.99
  -9  -3   5  567.60   29.10
   9  -3  -4  425.01   18.24
  -9  -3   4  407.83   17.08
  -9  -3   4  430.91   18.05
   9  -3  -4  493.27   21.42
   9   3  -4  450.92   20.98
  -9  -3   4  386.05   17.93
   9  -3  -3  119.00    6.04
  -9  -3   3  137.17    6.51
   9   3  -3  139.79    6.75
   9  -3  -3  154.59    7.87
  -9  -3   3  127.07    7.49
   9  -3  -2   86.92    8.22
  -9  -3   2   99.03    5.11
  -9  -3   2   93.36    4.31
  -9   3   2   85.43    4.44
   9  -3  -2   99.85    4.24
   9   3  -2   95.32    5.44
  -9   3   2   88.50    3.93
   9  -3  -1  894.78   36.63
  -9  -3   1  850.09   32.72
  -9  -3   1  856.93   32.15
  -9   3   1  857.58   32.58
   9   3  -1  933.75   35.89
   9  -3  -1  914.29   34.31
  -9   3   1  877.78   33.36
  -9  -3   0   20.32    2.19
  -9  -3   0   10.92    1.27
  -9   3   0   17.37    1.78
   9   3   0   17.03    3.61
   9  -3   0   12.04    1.41
   9  -3   1 1302.14   38.40
  -9  -3  -1 1337.99   37.84
  -9  -3  -1 1434.91   39.11
  -9   3  -1 1317.73   36.59
   9   3   1 1171.30   35.35
   9  -3   1 1221.19   33.80
   9  -3   2  363.90   18.90
  -9  -3  -2  319.34   17.00
  -9  -3  -2  367.34   18.52
  -9   3  -2  350.57   18.11
   9   3   2  362.62   18.74
   9  -3   2  335.64   17.36
   9  -3   3  480.71   19.97
  -9  -3  -3  411.17   17.52
  -9  -3  -3  436.26   17.66
  -9   3  -3  440.40   18.28
   9   3   3  440.85   18.43
   9  -3   3  420.82   17.72
   9  -3   4   69.22    6.13
  -9  -3  -4   69.50    6.35
  -9  -3  -4   81.41    6.72
  -9   3  -4   93.29    7.47
   9   3   4   95.50    8.06
   9  -3   4   83.17    7.36
  -9  -3  -5  129.00   11.99
  -9   3  -5  140.65   12.74
  -9  -3  -5  129.27   11.65
  -9   3  -5  149.12   13.44
   9   3   5  136.61   12.55
   9  -3   5  129.90   12.09
  -9  -3  -6    8.89    3.49
  -9   3  -6    4.97    2.52
  -9  -3  -6    1.89    2.31
  -9   3  -6    6.54    2.78
   9  -3   6   13.15    4.07
   9  -5  -9  169.53   15.48
   9   5  -9  155.50   14.06
  -9  -5   9  172.60   16.63
   9  -5  -8   36.65   11.20
   9   5  -8   57.33    6.89
  -9  -5   8   40.35    6.73
   9  -5  -7   52.65    4.33
   9  -5  -7   54.43   11.06
   9   5  -7   52.39   12.91
  -9  -5   7   63.03    6.72
   9  -5  -6  442.88   23.10
   9  -5  -6  407.81   22.52
   9   5  -6  404.08   22.63
  -9  -5   6  441.61   25.29
   9  -5  -5  449.82   22.31
  -9  -5   5  423.74   19.77
  -9  -5   5  432.75   20.20
   9  -5  -5  435.96   22.38
   9   5  -5  395.33   21.22
  -9  -5   5  448.24   23.80
  -9  -5   4  886.09   23.92
   9  -5  -4 1001.94   28.39
  -9  -5   4  985.08   26.71
   9  -5  -4 1059.32   30.43
   9   5  -4  919.92   26.13
  -9  -5   4  838.33   26.46
   9  -5  -3  178.80    8.76
  -9  -5   3  169.16    7.83
   9  -5  -3  149.21    7.36
   9   5  -3  184.71    9.32
  -9  -5   3  198.54   10.97
   9  -5  -2   53.14    3.65
  -9  -5   2   44.91    3.30
  -9  -5   2   38.23    2.35
  -9   5   2   49.59    3.23
  -9  -5   2   48.41    2.64
   9   5  -2   46.68    3.70
   9  -5  -1   32.82    4.26
  -9  -5   1   41.12    3.10
  -9  -5   1   34.85    3.37
  -9  -5   1   33.45    2.07
  -9   5   1   28.63    2.32
   9   5  -1   35.87    6.15
   9  -5  -1   36.51    2.12
  -9   5   1   38.61    2.71
   9  -5   0  282.89   13.50
  -9  -5   0  290.43   10.27
  -9  -5   0  260.88    8.14
  -9   5   0  244.86    8.56
   9   5   0  241.28    9.14
   9  -5   0  273.51    8.79
   9  -5   1  727.86   35.41
  -9  -5  -1  698.55   34.15
  -9  -5  -1  697.81   33.15
  -9   5  -1  677.90   32.67
   9   5   1  764.86   37.09
   9  -5   1  730.90   35.05
   9  -5   2  362.76   20.34
  -9  -5  -2  434.16   23.47
  -9  -5  -2  373.06   19.60
  -9   5  -2  339.74   18.44
   9   5   2  369.38   20.22
   9  -5   2  414.21   22.20
   9  -5   3  467.05   34.13
  -9  -5  -3  485.37   35.49
  -9  -5  -3  470.73   33.94
  -9   5  -3  472.96   34.50
   9   5   3  481.63   35.48
   9  -5   3  487.23   35.51
   9  -5   4  157.79   22.69
  -9  -5  -4  165.32   12.48
  -9  -5  -4  180.09   12.78
  -9   5  -4  184.71   13.37
   9   5   4  169.53   12.60
   9  -5   4  151.63   11.52
   9  -5   5  120.60   11.71
  -9  -5  -5  169.81   16.32
  -9  -5  -5  147.68   13.59
  -9   5  -5  171.72   16.08
   9   5   5  181.32   16.83
   9  -5   5  158.75   15.43
   9  -7  -9   71.60   15.75
   9   7  -9   70.33    7.28
  -9  -7   9  102.40   12.10
   9  -7  -8   48.09   10.38
   9   7  -8   54.91    6.34
  -9  -7   8   41.18    6.67
   9  -7  -7  210.53   17.39
   9  -7  -7  197.22   29.93
   9   7  -7  150.24   13.67
  -9  -7   7  177.63   16.48
   9  -7  -6  192.39   14.89
   9  -7  -6  163.86   24.56
   9   7  -6  165.82   12.63
  -9  -7   6  161.04   14.85
   9  -7  -5  264.06   14.84
   9  -7  -5  242.82   14.08
   9   7  -5  253.32   13.67
  -9  -7   5  236.95   15.41
  -9  -7   4  194.99    9.74
   9  -7  -4  239.17   12.80
  -9  -7   4  217.51   10.87
   9  -7  -4  250.98   14.08
   9   7  -4  213.71   10.87
  -9  -7   4  225.21   13.62
   9  -7  -3  314.23   16.39
  -9  -7   3  316.18   15.70
   9   7  -3  341.06   16.58
  -9  -7   3  264.68   13.04
  -9   7   3  262.78   13.15
  -9  -7   3  312.77   17.87
   9  -7  -2  191.74    7.89
  -9  -7   2  208.15    7.71
  -9  -7   2  173.78    5.64
  -9  -7   2  190.56    5.69
  -9   7   2  244.57    8.68
   9   7  -2  198.39    8.40
   9  -7  -1 1057.70   30.41
  -9  -7   1  980.80   28.09
  -9  -7   1  865.73   23.22
  -9  -7   1  982.40   26.19
  -9   7   1  880.70   24.90
   9   7  -1  966.84   33.13
   9  -7  -1  971.24   26.11
  -9   7   1  835.40   23.39
   9  -7   0  201.62   12.46
  -9  -7   0  229.84   12.42
  -9  -7   0  190.46    9.33
  -9  -7   0  218.23   10.70
  -9   7   0  228.14   12.12
   9   7   0  224.09   16.09
   9  -7   0  220.53   11.31
   9  -7   1   93.89   18.02
  -9  -7  -1  111.21    7.24
  -9  -7  -1   92.01    5.19
  -9   7  -1   71.93    4.95
   9   7   1  106.45   19.29
   9  -7   1   97.00    6.19
   9  -7   2  267.12   12.86
  -9  -7  -2  263.64   12.40
  -9  -7  -2  288.37   11.72
  -9   7  -2  293.23   13.01
   9   7   2  280.02   12.94
   9  -7   2  273.91   12.33
   9  -7   3   68.10    9.93
  -9  -7  -3   47.28    5.02
  -9  -7  -3   56.41    4.76
  -9   7  -3   60.45    5.42
   9   7   3   66.72   17.45
   9  -7   3   46.58    5.12
   9  -7   4   93.40   19.03
  -9  -7  -4   63.49    7.15
  -9   7  -4   78.00    7.35
   9   7   4   83.35   12.46
   9  -7   4   97.45    9.29
   9  -7   5  110.23   10.62
  -9  -7  -5  153.59   14.31
  -9  -7  -5  105.78   10.04
  -9   7  -5  126.37   12.12
   9  -7   5  104.76   10.52
   9  -9  -8   21.08    4.76
   9  -9  -8   10.38    4.27
   9   9  -8   15.22    3.36
  -9  -9   8   16.24    5.74
   9  -9  -7  122.87   10.35
   9  -9  -7  127.17   16.84
   9   9  -7  115.42    9.24
  -9  -9   7  129.26   13.03
   9  -9  -6   54.69    5.01
   9  -9  -6   51.03   14.52
   9   9  -6   48.02    8.18
  -9  -9   6   61.70    7.84
   9  -9  -5  879.71   33.85
   9  -9  -5  879.68   33.62
   9   9  -5  806.85   31.15
  -9  -9   5  823.12   34.86
   9  -9  -4  342.41   18.82
  -9  -9   4  327.10   17.00
   9  -9  -4  315.27   16.98
   9   9  -4  316.72   16.35
  -9  -9   4  344.30   20.78
   9  -9  -3  514.67   25.99
  -9  -9   3  432.83   21.38
  -9   9   3  363.72   18.09
  -9  -9   3  465.76   25.72
   9  -9  -2  751.67   36.82
  -9  -9   2  706.11   34.26
  -9  -9   2  641.63   29.85
  -9   9   2  629.95   30.60
  -9  -9   2  678.27   34.87
   9  -9  -1  263.31   14.18
  -9  -9   1  308.26   16.11
  -9   9   1  288.85   14.99
   9   9  -1  318.92   17.50
   9  -9  -1  270.23   13.32
   9  -9   0  486.36   26.42
  -9  -9   0  555.57   29.41
  -9   9   0  544.11   28.25
   9   9   0  553.51   29.47
   9  -9   0  537.33   27.60
   9  -9   1  137.48   15.64
  -9  -9  -1  102.11    6.40
   9   9   1   93.56   14.16
   9  -9   1  103.91    5.96
   9  -9   2  459.41   28.39
  -9  -9  -2  400.10   25.22
   9   9   2  341.96   21.80
   9  -9   2  378.25   23.56
   9  -9   3   30.75    8.27
  -9  -9  -3   45.24    5.08
  -9   9  -3   47.71    4.99
   9  -9   3   43.35    4.92
   9  -9   4   11.04    3.66
  -9  -9  -4   10.24    2.85
  -9   9  -4   19.09    4.36
   9   9   4   15.32    4.06
   9  -9   4   14.05    4.19
   9  -9   5    5.35    2.01
  -9  -9  -5   17.71    4.89
  -9   9  -5   14.40    3.30
   9   9   5    6.63    2.34
   9  -9   5    7.29    3.80
   9 -11  -8    5.77    2.51
   9 -11  -8    4.41    2.58
  -9 -11   8   15.65    7.05
   9 -11  -7  168.80   15.55
   9 -11  -7  184.15   16.72
  -9 -11   7  185.00   19.88
   9 -11  -6  245.25   17.87
   9 -11  -6  232.99   16.96
  -9 -11   6  206.39   16.73
   9 -11  -5   66.39    6.42
   9 -11  -5   75.76    6.47
  -9 -11   5   71.69    8.56
   9 -11  -4   67.88    6.57
  -9 -11   4   61.83    5.36
  -9  11   4   42.14    4.07
  -9 -11   4   56.51    7.48
   9 -11  -3   59.85    5.09
  -9 -11   3   65.87    4.15
  -9  11   3   71.34    4.72
  -9 -11   3   74.55    7.55
   9 -11  -2  215.68   10.51
  -9 -11   2  193.45    9.09
  -9  11   2  194.93    8.85
  -9 -11   2  170.88   10.73
   9 -11  -1  209.03   10.38
  -9 -11   1  273.04   12.29
  -9  11   1  238.51   10.42
   9  11  -1  235.72   12.19
   9 -11  -1  184.51    7.90
   9 -11   0  419.01   30.80
  -9 -11   0  493.55   36.01
  -9  11   0  425.21   30.83
   9  11   0  421.28   31.36
   9 -11   0  399.47   28.90
   9 -11   1  316.65   31.69
  -9 -11  -1  309.71   20.05
  -9  11  -1  321.40   20.22
   9  11   1  296.92   19.60
   9 -11   1  273.76   17.35
   9 -11   2   44.14   12.52
  -9 -11  -2   30.36    4.16
  -9  11  -2   44.49    4.67
   9 -11   2   27.46    3.61
   9 -11   3   99.88   15.42
  -9 -11  -3  125.90   11.99
  -9  11  -3  122.18   11.26
   9  11   3   88.06   18.04
   9 -11   3  102.18   10.29
   9 -11   4  151.35   15.01
  -9 -11  -4  128.25   13.16
  -9  11  -4  136.24   13.51
   9  11   4  119.01   12.45
   9 -11   4  126.88   13.15
   9 -13  -7   23.06    4.77
  -9 -13   7   21.82    8.36
   9 -13  -6  117.60   11.63
   9 -13  -6  116.08   22.33
  -9 -13   6  115.96   13.89
   9 -13  -5   78.93    7.51
   9 -13  -5   56.92    6.69
   9 -13  -4  299.42   20.74
  -9  13   4  236.27   15.86
  -9 -13   4  264.89   20.51
   9 -13  -3   95.81    8.37
  -9 -13   3  103.08    7.81
  -9  13   3   95.24    7.42
  -9 -13   3  142.72   15.08
  -9 -13   2   96.63    7.35
  -9  13   2   68.10    5.27
  -9 -13   2   72.84    8.53
   9 -13  -1   26.16    4.13
  -9 -13   1   39.46    4.25
  -9  13   1   33.92    3.60
   9 -13   0  132.87   11.98
  -9 -13   0  103.58    8.52
  -9  13   0  127.40   10.93
   9 -13   1   17.92    3.79
  -9 -13  -1   17.31    3.20
  -9  13  -1   13.48    2.35
   9  13   1    8.75    3.70
   9 -13   1   17.73    3.25
   9 -13   2   38.08    9.29
  -9 -13  -2   20.81    3.82
  -9  13  -2   34.25    5.01
   9  13   2   14.21    6.96
   9 -13   2   24.71    4.18
   9 -13   3  194.78   19.17
  -9 -13  -3  168.07   16.44
  -9  13  -3  187.93   17.80
   9  13   3  145.00   19.22
   9 -13   3  148.62   14.67
   9 -15  -6   49.70    6.79
   9 -15  -6   40.06    5.47
  -9 -15   6   30.04    7.58
   9 -15  -5    9.86    3.35
  -9  15   5   11.58    2.54
  -9 -15   5   34.32    9.43
   9 -15  -4   11.78    3.92
  -9  15   4    3.11    1.86
  -9 -15   4    6.39    4.75
   9 -15  -3   14.33    3.44
  -9  15   3   13.93    2.47
  -9 -15   3   24.98    5.97
   9 -15  -2   93.68    8.69
  -9 -15   2  100.76    8.97
  -9  15   2   94.46    7.87
  -9 -15   2   94.86   11.18
   9 -15  -1   14.79    3.74
  -9 -15   1   16.65    3.39
  -9  15   1   24.42    3.51
  -9 -15   1   20.28    5.85
   9 -15   0   56.68    7.38
  -9 -15   0   42.14    5.74
  -9  15   0   49.24    5.73
   9  15   0   34.32    5.21
   9 -15   1   44.20    6.49
  -9 -15  -1   42.25    6.56
  -9  15  -1   40.14    6.19
   9  15   1   37.31   11.99
  -9 -15  -2   35.95    8.29
  -9  15  -2   32.13    7.30
   9  15   2   11.69    5.83
   9 -17  -4    8.53    3.39
  -9  17   4    6.40    2.54
  -9 -17   4   12.25    5.14
   9 -17  -3   55.42    7.40
  -9  17   3   57.05    6.09
  -9 -17   3   37.43   10.19
   9 -17  -2   85.37    9.63
  -9 -17   2   99.46   10.57
  -9  17   2   99.54    9.97
  -9 -17   2   95.73   12.78
   9 -17  -1   49.37   10.66
  -9 -17   1   47.47   10.28
  -9  17   1   49.06   10.21
  -9 -17   1   68.76   10.42
   9 -17   0  224.02   18.87
  -9 -17   0  241.84   20.21
  -9  17   0  248.97   20.07
  -9 -17   0  233.04   21.93
  10   0  -9    2.64    1.83
  10   0  -8   47.71   11.69
 -10   0   8   27.95    3.48
  10   0  -7    3.29    1.50
 -10   0   7    2.94    1.78
  10   0  -6 1078.43   53.51
  10   0  -6 1092.18   55.70
 -10   0   6 1135.49   57.51
  10   0  -5    0.27    0.86
 -10   0   5    8.61    1.32
  10   0  -5    0.88    1.02
 -10   0   5    0.40    0.32
 -10   0   5    1.63    1.39
  10   0  -4 5122.19  236.37
  10   0  -4 5560.96  257.06
 -10   0   4 4280.68  197.22
 -10   0   4 4713.35  217.76
  10   0  -3    1.98    1.03
  10   0  -3    0.16    1.15
 -10   0   3    1.04    0.67
 -10   0   3    2.73    1.32
  10   0  -2 1288.94   53.20
 -10   0   2 1317.55   53.82
  10   0  -2 1314.40   53.71
 -10   0   2 1117.14   45.55
  10   0  -1    1.63    1.57
  10   0  -1    0.98    0.53
  10   0   0  364.43   12.24
 -10   0   0  294.31    9.47
  10   0   0  331.57   10.99
 -10   0  -1    1.87    1.32
  10   0   1    6.54    2.22
  10   0   2  131.82    8.93
 -10   0  -2  124.51    7.84
  10   0   2  123.86    7.93
 -10   0  -3    4.92    2.49
 -10   0  -3    9.21    2.82
  10   0   3    0.40    1.77
 -10   0  -4   72.15    6.69
 -10   0  -4   52.99    5.38
  10   0   4   43.82    4.88
 -10   0  -5    4.23    2.23
 -10   0  -5    3.91    3.06
  10   0   5   -0.19    1.99
  10  -2  -9  199.47   17.58
  10   2  -9  167.10   15.64
 -10  -2   9  184.23   16.60
  10  -2  -8  291.02   20.40
  10   2  -8  233.34   16.68
 -10  -2   8  319.67   22.19
  10  -2  -7   15.78    3.60
  10   2  -7   19.79    4.39
 -10   2   7   17.30    2.14
 -10  -2   7   15.09    3.67
  10  -2  -6  231.24   12.34
  10  -2  -6  272.59   15.19
  10   2  -6  242.09   16.14
 -10   2   6  238.97   12.68
 -10  -2   6  270.56   16.00
  10   2  -5  332.59   15.95
  10  -2  -5  282.49   14.44
 -10  -2   5  287.96   13.95
  10  -2  -5  307.89   17.88
  10   2  -5  297.12   15.81
 -10   2   5  261.05   12.58
 -10   2   5  303.67   14.75
 -10  -2   5  323.63   17.56
  10   2  -4  884.28   25.80
  10  -2  -4  914.85   26.01
  10   2  -4  995.38   28.04
  10  -2  -4  882.87   28.06
 -10   2   4  846.73   22.41
 -10   2   4  845.05   22.91
 -10  -2   4  766.64   23.19
  10   2  -3   29.61    6.59
  10  -2  -3   39.55    6.30
  10   2  -3   31.15    2.22
  10  -2  -3   31.41    2.68
 -10   2   3   31.95    1.79
 -10   2   3   30.62    2.01
 -10  -2   3   35.64    3.32
  10   2  -2  433.47   18.83
  10  -2  -2  461.43   20.25
 -10   2   2  435.53   18.78
 -10  -2   2  429.66   18.25
  10   2  -2  465.05   20.27
  10  -2  -2  414.91   17.79
 -10   2   2  400.20   16.84
  10   2  -1  710.71   30.08
  10  -2  -1  709.78   30.18
 -10   2   1  652.58   27.43
 -10  -2   1  706.68   29.21
  10   2  -1  702.64   29.66
  10  -2  -1  637.80   26.52
 -10   2   1  640.82   26.91
  10   2   0  126.61    5.95
  10  -2   0  121.64   15.58
 -10  -2   0  122.03    4.79
 -10   2   0  125.82    5.63
  10   2   0  103.39    5.18
  10  -2   0  114.88    4.75
  10  -2   1  873.60   43.53
 -10  -2  -1  876.48   42.50
 -10  -2  -1  914.87   43.64
 -10   2  -1  958.57   45.89
  10   2   1  861.96   42.81
  10  -2   1  889.65   42.68
  10  -2   2  507.83   27.56
 -10  -2  -2  501.45   26.85
 -10  -2  -2  514.60   26.81
 -10   2  -2  467.73   24.77
  10   2   2  503.83   26.64
  10  -2   2  532.70   27.94
  10  -2   3   78.13    6.63
 -10  -2  -3   79.54    6.68
 -10  -2  -3   76.40    6.01
 -10   2  -3   67.13    6.15
  10   2   3   82.67    6.85
  10  -2   3   71.96    5.88
 -10  -2  -4   14.83    3.09
 -10   2  -4   13.27    2.81
 -10  -2  -4   22.39    3.46
 -10   2  -4   15.62    3.19
  10   2   4   14.40    2.92
  10  -2   4   19.71    2.89
 -10  -2  -5   10.62    3.57
 -10   2  -5    4.90    2.48
 -10  -2  -5    6.44    3.26
 -10   2  -5   21.94    5.03
  10   2   5    9.68    2.66
  10  -4  -9   23.68    9.24
  10   4  -9   25.20    7.39
 -10  -4   9   34.81    7.90
  10  -4  -8   41.78   10.15
  10   4  -8   35.15   10.18
 -10  -4   8   34.42    5.40
  10  -4  -7   60.41    4.63
  10   4  -7   59.86   11.59
 -10  -4   7   62.33    6.18
  10  -4  -6  482.54   18.67
  10   4  -6  499.56   20.03
 -10  -4   6  502.40   22.07
  10  -4  -5   42.82    3.54
 -10  -4   5   40.78    2.48
  10  -4  -5   50.20    9.58
  10   4  -5   40.36    6.27
 -10  -4   5   76.62    6.22
  10  -4  -4   72.76    4.86
 -10  -4   4   61.19    3.70
 -10  -4   4   72.73    4.26
  10  -4  -4   90.08   13.00
  10   4  -4   75.14    6.26
 -10  -4   4   69.46    5.66
  10  -4  -3   25.10    4.59
 -10  -4   3   19.38    1.84
  10   4  -3   22.63    1.67
 -10  -4   3   27.72    3.12
  10  -4  -2  258.05    9.98
 -10  -4   2  274.15    9.37
 -10   4   2  235.54    8.09
 -10  -4   2  260.37    8.02
  10  -4  -2  257.45    7.36
  10   4  -2  310.47   10.81
 -10   4   2  241.14    7.23
  10  -4  -1  242.19   11.28
 -10  -4   1  255.43    9.24
 -10  -4   1  227.17    7.27
 -10   4   1  230.66    8.11
  10   4  -1  233.93    8.83
  10  -4  -1  229.75    7.18
 -10   4   1  201.57    7.27
 -10  -4   0 1451.19   68.62
 -10  -4   0 1303.99   60.86
 -10   4   0 1214.76   57.23
  10   4   0 1259.00   61.60
  10  -4   0 1344.25   62.82
  10  -4   1  938.59   47.06
 -10  -4  -1 1064.23   51.36
 -10  -4  -1 1166.69   55.19
 -10   4  -1 1190.32   56.72
  10   4   1 1095.11   54.07
  10  -4   1 1054.64   50.17
  10  -4   2  895.56   36.48
 -10  -4  -2  928.04   35.88
 -10  -4  -2  919.87   34.26
 -10   4  -2  932.64   35.47
  10   4   2  917.76   37.38
  10  -4   2  972.83   36.63
  10  -4   3   67.57   16.79
 -10  -4  -3   68.08    6.10
 -10  -4  -3   71.49    5.75
 -10   4  -3   63.50    5.70
  10   4   3   53.83    5.12
  10  -4   3   64.06    5.71
  10  -4   4   70.20    7.97
 -10  -4  -4   51.36    7.16
 -10  -4  -4   63.28    7.57
 -10   4  -4   64.17    7.81
  10   4   4   84.17    7.88
  10  -4   4   76.19    7.54
 -10  -4  -5   42.09    9.49
 -10   4  -5   67.07    7.76
 -10  -4  -5   63.71    7.57
 -10   4  -5   67.22    7.54
  10   4   5   66.16    7.73
  10  -4   5   48.93   10.41
  10  -6  -9   48.53   15.41
  10   6  -9   43.60   12.26
 -10  -6   9   58.10    8.08
  10  -6  -8   49.30   12.99
  10   6  -8   54.17   15.52
 -10  -6   8   73.15    8.99
  10  -6  -7  136.52   11.55
  10  -6  -7  155.18   13.31
  10   6  -7  121.98   21.31
 -10  -6   7   98.79    9.28
  10  -6  -6  143.12   11.35
  10  -6  -6  110.22    9.26
  10   6  -6  146.73   16.74
 -10  -6   6  145.14   13.12
  10  -6  -5  140.60    8.56
 -10  -6   5  130.76    6.94
  10  -6  -5  160.79   10.53
  10   6  -5  167.05   10.10
 -10  -6   5  135.44   10.01
  10  -6  -4  128.68    7.74
 -10  -6   4  141.65    7.52
  10  -6  -4  176.67   10.18
  10   6  -4  128.07    7.14
 -10  -6   4  145.75    9.81
  10  -6  -3  432.44   21.63
 -10  -6   3  483.21   23.46
 -10   6   3  379.59   18.61
 -10  -6   3  484.64   25.43
  10  -6  -2   99.00   15.99
 -10  -6   2   90.02    5.54
 -10  -6   2   88.14    4.66
 -10   6   2   93.31    5.65
  10   6  -2  106.84    6.99
  10  -6  -1   48.28    8.92
 -10  -6   1   49.69    4.21
 -10  -6   1   32.51    2.65
 -10  -6   1   46.50    2.84
 -10   6   1   49.69    3.83
  10   6  -1   52.09    8.68
  10  -6  -1   47.20    2.89
  10  -6   0   76.02   15.28
 -10  -6   0   53.44    4.36
 -10  -6   0   51.24    3.29
 -10   6   0   52.17    4.24
  10   6   0   61.30   14.60
  10  -6   0   59.37    3.91
  10  -6   1  559.03   30.31
 -10  -6  -1  558.94   29.50
 -10  -6  -1  544.77   27.75
 -10   6  -1  547.08   28.66
  10   6   1  537.67   28.51
  10  -6   1  526.18   27.28
  10  -6   2    6.47    2.48
 -10  -6  -2    6.55    3.43
 -10  -6  -2    5.35    2.30
 -10   6  -2    5.20    2.35
  10   6   2    4.07    1.97
  10  -6   2    5.27    1.74
  10  -6   3   26.68    6.96
 -10  -6  -3   13.33    2.93
 -10  -6  -3   17.03    2.42
 -10   6  -3   31.71    3.79
  10   6   3   24.65    8.17
  10  -6   4  284.56   23.97
 -10  -6  -4  252.92   20.98
 -10   6  -4  231.70   19.76
  10   6   4  273.31   23.06
  10  -6   4  291.53   24.30
  10  -6   5   12.65    3.73
 -10  -6  -5   18.62    3.80
 -10  -6  -5   13.78    3.40
 -10   6  -5    9.90    3.92
  10  -6   5    9.90    2.85
  10  -8  -8  102.63   10.67
  10   8  -8   52.36   15.66
 -10  -8   8   56.18   10.95
  10  -8  -7   31.24    4.32
  10  -8  -7   30.35    7.53
  10   8  -7   25.77    5.80
 -10  -8   7   38.13    7.77
  10  -8  -6   88.15    6.66
  10  -8  -6   91.32   16.87
  10   8  -6   95.03   13.08
 -10  -8   6   98.90   10.25
  10  -8  -5  455.94   33.15
  10  -8  -5  522.09   37.87
  10   8  -5  382.84   28.66
 -10  -8   5  467.92   35.78
  10  -8  -4   99.75    6.88
 -10  -8   4   78.40    4.86
  10  -8  -4   64.48    4.86
  10   8  -4   80.25    4.87
 -10  -8   4   88.19    8.25
  10  -8  -3  247.92   14.07
 -10  -8   3  253.58   13.77
 -10   8   3  262.70   14.39
 -10  -8   3  261.68   16.37
  10  -8  -2  425.57   21.68
 -10  -8   2  448.93   22.46
 -10  -8   2  420.41   19.89
 -10   8   2  412.67   20.61
  10   8  -2  448.61   23.32
  10  -8  -1  658.46   35.14
 -10  -8   1  676.25   35.05
 -10  -8   1  653.57   32.52
 -10   8   1  616.74   31.77
  10   8  -1  634.39   33.61
  10  -8  -1  653.61   32.65
  10  -8   0  135.86    9.00
 -10  -8   0  159.71   10.07
 -10  -8   0  138.52    7.43
 -10   8   0  140.89    8.54
  10   8   0  144.35    9.26
  10  -8   0  149.87    8.62
  10  -8   1   73.66   12.67
 -10  -8  -1   55.05    5.76
 -10  -8  -1   50.33    4.23
 -10   8  -1   53.47    5.41
  10   8   1   56.37   12.59
  10  -8   1   52.49    4.84
  10  -8   2   47.65    8.56
 -10  -8  -2   31.56    3.71
 -10  -8  -2   41.67    3.49
 -10   8  -2   56.21    5.04
  10   8   2   47.02   13.01
  10  -8   2   47.39    4.56
  10  -8   3  135.73   25.70
 -10  -8  -3  146.59   12.37
 -10   8  -3  107.10    9.38
  10   8   3  111.55   24.96
  10  -8   3  123.42   10.52
  10  -8   4  314.01   26.60
 -10  -8  -4  307.33   26.32
 -10   8  -4  277.60   23.78
  10   8   4  301.94   25.83
  10  -8   4  300.74   25.58
  10 -10  -8   10.91    3.44
  10 -10  -8    7.89    3.64
  10  10  -8    1.60    1.23
 -10 -10   8   12.34    4.96
  10 -10  -7  254.62   22.51
  10 -10  -7  239.13   21.15
  10  10  -7  222.83   19.30
 -10 -10   7  202.25   20.58
  10 -10  -6   36.47    4.34
  10 -10  -6   37.01   11.79
  10  10  -6   27.86    7.42
 -10 -10   6   48.00    6.59
  10 -10  -5  231.45   15.32
  10 -10  -5  204.02   13.19
 -10 -10   5  219.99   16.45
  10 -10  -4  153.59   12.38
 -10 -10   4  125.56    9.66
 -10  10   4   96.77    7.74
 -10 -10   4  124.09   12.06
  10 -10  -3   30.77    3.51
 -10 -10   3   24.67    2.44
 -10  10   3   23.02    2.59
 -10 -10   3   33.96    4.81
  10 -10  -2  232.95   11.18
 -10 -10   2  274.61   12.03
 -10  10   2  250.74   10.87
 -10 -10   2  236.18   13.31
  10 -10  -1   69.86    4.94
 -10 -10   1   68.77    5.17
 -10  10   1   75.83    4.59
  10  10  -1   79.17   15.78
  10 -10   0  493.96   35.99
 -10 -10   0  562.08   40.81
 -10  10   0  500.83   36.12
  10  10   0  497.09   37.04
  10 -10   0  489.68   35.00
  10 -10   1  107.82   13.21
 -10 -10  -1  104.62    8.51
 -10  10  -1  127.16    9.20
  10  10   1  117.17   26.06
  10 -10   1  117.30    8.42
  10 -10   2   23.34    8.92
 -10 -10  -2   24.44    3.78
  10  10   2   25.58    7.41
  10 -10   2   42.71    4.72
  10 -10   3   99.04    9.82
 -10 -10  -3  125.44   12.34
  10  10   3   79.14   22.82
  10 -10   3  116.45   11.28
  10 -10   4   25.43   15.91
 -10 -10  -4   42.19    6.89
 -10  10  -4   40.53    6.25
  10 -10   4   32.42    6.02
  10 -12  -7  362.31   40.73
  10 -12  -7  366.76   41.05
 -10 -12   7  324.56   31.59
  10 -12  -6   58.00    7.20
  10 -12  -6   70.96    7.81
 -10 -12   6   53.65    8.42
  10 -12  -5  278.08   21.05
  10 -12  -5  238.25   17.70
 -10 -12   5  243.53   20.23
  10 -12  -4   30.19    4.12
 -10  12   4   32.13    3.67
 -10 -12   4   20.29    4.28
  10 -12  -3  152.39   13.48
 -10 -12   3  134.82   11.56
 -10  12   3  121.10   10.41
 -10 -12   3  144.36   14.77
  10 -12  -2  272.58   17.85
 -10 -12   2  239.14   15.46
 -10  12   2  226.62   14.45
 -10 -12   2  264.01   19.08
  10 -12  -1  238.74   19.87
 -10 -12   1  203.88   17.06
 -10  12   1  244.50   20.08
  10  12  -1  246.14   21.16
 -10 -12   0    6.72    2.27
 -10  12   0   15.61    2.82
  10  12   0    5.25    2.59
  10 -12   1   70.67   10.24
 -10 -12  -1   65.08    7.85
 -10  12  -1   70.37    7.78
  10  12   1   59.31   15.66
  10 -12   1   59.97    7.06
  10 -12   2   32.16    9.86
 -10 -12  -2   41.66    6.59
 -10  12  -2   36.71    5.73
  10  12   2   17.95    7.32
  10 -12   2   23.72    4.36
  10 -12   3    6.43    3.36
 -10 -12  -3   18.49    5.15
 -10  12  -3   21.69    5.36
  10  12   3    9.61    4.12
  10 -12   3   10.91    4.47
  10 -14  -6   34.42    7.92
  10 -14  -6   28.31    6.39
 -10 -14   6   33.22    9.19
  10 -14  -5   99.28    9.96
 -10  14   5   92.75    8.48
 -10 -14   5  105.57   12.78
  10 -14  -4    7.56    3.13
 -10  14   4    3.28    1.80
 -10 -14   4   10.48    4.43
  10 -14  -3  224.98   17.63
 -10 -14   3  176.32   13.52
 -10  14   3  167.33   12.84
 -10 -14   3  189.01   17.11
 -10 -14   2  142.63   11.81
 -10  14   2  150.70   11.81
 -10 -14   2  158.42   15.23
  10 -14  -1  169.13   13.75
 -10 -14   1  145.02   11.91
 -10  14   1  166.06   13.23
 -10 -14   1  141.23   13.89
  10 -14   0   75.42    8.24
 -10 -14   0   62.16    6.90
 -10  14   0   61.98    6.41
  10  14   0   51.05   13.28
  10 -14   1   14.62    9.96
 -10 -14  -1   41.48    7.98
 -10  14  -1   41.05    7.27
  10 -14   2   59.92   13.92
 -10 -14  -2   71.55    8.36
 -10  14  -2   70.52    8.01
  10  14   2   60.92   21.98
  10 -16  -4   25.88    7.19
 -10 -16   4   14.30    5.41
  10 -16  -3  211.05   19.95
 -10  16   3  145.04   13.54
 -10 -16   3  162.33   17.93
  10 -16  -2    9.07    3.48
 -10 -16   2    7.24    3.06
 -10  16   2   11.22    2.93
 -10 -16   2   38.08    9.35
  10 -16  -1   24.56    6.41
 -10 -16   1   23.62    5.81
 -10  16   1   13.23    3.63
 -10 -16   1   14.28    5.15
  10 -16   0   16.90    3.82
 -10 -16   0   18.92    3.76
 -10  16   0   19.32    3.94
  10  16   0    9.87    3.70
  11   1  -9  102.49   10.26
  11  -1  -9  104.48   20.35
  11  -1  -8   19.94    5.63
  11   1  -8   22.34    7.11
 -11  -1   8   21.35    3.55
  11   1  -7  163.93   11.25
  11  -1  -7  155.39   11.52
 -11  -1   7  137.92   10.36
  11  -1  -6   50.25    6.57
  11   1  -6   47.82    6.68
  11  -1  -6   49.82    7.69
 -11   1   6   54.42    3.59
 -11  -1   6   39.52    3.66
  11   1  -5  278.79   13.80
  11  -1  -5  286.04   15.33
  11  -1  -5  296.22   17.61
  11   1  -5  299.52   16.50
 -11   1   5  273.01   13.87
 -11  -1   5  278.42   15.03
  11   1  -4  106.79    6.19
  11  -1  -4  124.04    7.86
  11   1  -4  144.46    8.17
  11  -1  -4  128.37    7.99
 -11   1   4  106.76    5.51
 -11   1   4  135.66    7.63
 -11  -1   4   94.83    6.05
  11   1  -3  669.55   32.25
  11  -1  -3  646.75   31.48
 -11   1   3  514.40   24.64
 -11  -1   3  549.08   26.10
 -11   1   3  646.81   30.38
 -11   1   3  600.05   28.91
 -11  -1   3  640.98   31.33
  11   1  -2   84.84    5.41
  11  -1  -2   99.85   14.21
 -11   1   2   76.75    4.78
 -11  -1   2   75.84    4.53
  11  -1  -2   69.84    4.18
  11   1  -2   86.01    6.36
 -11   1   2   71.75    4.35
  11   1  -1  124.90   14.62
  11  -1  -1  119.99    7.41
 -11  -1   1  114.18    6.47
 -11   1   1  102.20    5.99
  11   1  -1  134.00    9.52
  11  -1  -1  116.96    6.56
  11   1   0  295.46   15.64
  11  -1   0  274.06   16.39
 -11  -1   0  284.43   14.39
 -11   1   0  257.83   13.35
  11   1   0  281.01   15.19
  11  -1   0  279.28   14.32
  11   1   1 1007.53   51.43
 -11  -1  -1 1118.28   56.34
 -11   1  -1  971.01   49.17
  11   1   1 1069.17   54.17
  11  -1   1 1121.58   56.61
  11  -1   2   78.53    7.28
 -11  -1  -2   63.53    6.23
 -11  -1  -2   69.31    6.21
 -11   1  -2   60.09    5.83
  11   1   2   74.83    6.77
  11  -1   2   58.41    5.65
 -11  -1  -3  160.05   13.59
 -11   1  -3  173.76   14.80
  11   1   3  159.12   13.74
  11  -1   3  152.92   13.29
 -11  -1  -4   40.46    5.72
 -11   1  -4   44.72    5.84
 -11  -1  -4   46.33    5.86
 -11   1  -4   46.39    5.75
  11   1   4   41.57    5.53
  11  -1   4   42.52    5.71
 -11  -1  -5   28.79    5.22
 -11   1  -5   31.21    5.46
 -11   1  -5   32.98    5.45
 -11  -1  -5   39.40    6.12
  11   1   5   20.61    4.18
  11  -1   5   29.59    5.29
  11  -3  -9   98.49   16.41
  11   3  -9   86.89   19.90
  11  -3  -8   37.49   10.90
  11   3  -8   40.50    9.51
 -11  -3   8   43.92    6.47
  11  -3  -7  182.75   15.41
  11   3  -7  147.37   12.75
 -11  -3   7  141.11   13.05
  11  -3  -6   38.85    7.02
  11  -3  -6   33.01    7.62
  11   3  -6   44.07    7.25
 -11  -3   6   43.16    5.29
  11  -3  -5  963.23   49.30
  11  -3  -5 1121.11   57.09
  11   3  -5 1073.34   54.43
 -11  -3   5  910.35   47.13
  11  -3  -4   91.43   11.92
 -11  -3   4   64.75    3.97
  11   3  -4   82.97    5.24
  11  -3  -4   71.98    5.13
 -11  -3   4   76.06    5.74
  11  -3  -3  175.60    9.67
 -11  -3   3  181.12    9.58
 -11  -3   3  140.68    7.29
 -11   3   3  149.36    7.97
 -11   3   3  158.50    7.57
 -11   3   3  147.85    7.09
 -11  -3   3  180.92   10.75
  11  -3  -2  296.30   17.04
 -11  -3   2  303.99   15.46
 -11  -3   2  297.71   14.63
 -11   3   2  283.72   14.39
  11   3  -2  330.00   17.31
  11  -3  -2  296.29   14.50
 -11   3   2  282.91   13.92
  11  -3  -1  837.86   40.26
 -11  -3   1  731.65   35.34
 -11  -3   1  781.11   36.92
 -11   3   1  728.89   34.81
  11   3  -1  796.73   38.60
  11  -3  -1  806.19   37.99
  11  -3   0  258.00   14.34
 -11  -3   0  253.45   13.74
 -11  -3   0  260.58   13.27
 -11   3   0  244.53   12.80
  11   3   0  238.73   12.86
  11  -3   0  260.41   13.27
  11  -3   1   72.84   15.49
 -11  -3  -1   67.63    5.04
 -11  -3  -1   38.40    2.96
 -11   3  -1   52.37    4.02
  11   3   1   59.64   10.29
  11  -3   1   52.51    3.63
  11  -3   2  125.07   10.98
 -11  -3  -2  124.25   10.58
 -11  -3  -2  108.20    8.79
 -11   3  -2   94.89    8.35
  11   3   2  137.40   18.80
  11  -3   2  127.06   10.36
  11  -3   3   71.98   14.31
 -11  -3  -3   84.48    7.40
 -11  -3  -3   75.50    6.31
 -11   3  -3   79.00    6.80
  11   3   3   76.23    6.78
  11  -3   3   64.47    5.83
 -11  -3  -4   18.84    4.04
 -11  -3  -4   14.97    3.32
 -11   3  -4   23.86    4.19
  11   3   4   23.09    4.05
  11  -3   4    9.81    2.93
 -11  -3  -5   77.69    8.15
 -11   3  -5   90.48    9.13
 -11  -3  -5   79.88    8.36
 -11   3  -5   64.11    7.12
  11   3   5   97.96    9.91
  11  -3   5   78.37    7.96
  11  -5  -9   37.86   14.00
  11   5  -9   48.55   14.87
 -11  -5   9   71.68    8.69
  11  -5  -8    2.70    2.06
  11   5  -8    4.03    1.68
 -11  -5   8    6.56    3.23
  11  -5  -7  418.56   26.89
  11  -5  -7  432.51   28.53
  11   5  -7  446.48   29.17
 -11  -5   7  391.77   27.26
  11  -5  -6  268.45   19.75
  11   5  -6  266.32   20.12
 -11  -5   6  283.18   22.60
  11  -5  -5  498.64   19.52
 -11  -5   5  508.88   18.85
  11   5  -5  464.63   19.77
 -11  -5   5  475.17   20.95
  11  -5  -4  134.75    8.29
 -11  -5   4  116.56    6.73
  11  -5  -4  131.28    7.90
  11   5  -4  154.21    8.79
 -11  -5   4  119.60    8.60
  11  -5  -3  448.22   22.44
 -11  -5   3  479.16   23.49
 -11   5   3  476.84   23.63
 -11  -5   3  407.11   19.52
 -11  -5   3  478.77   25.15
  11  -5  -2   18.09    2.65
 -11  -5   2   18.46    2.42
 -11  -5   2   16.02    1.43
 -11   5   2   13.82    1.95
  11  -5  -2   12.47    2.29
  11   5  -2   17.89    4.45
 -11   5   2   10.53    0.99
  11  -5  -1  112.79   16.71
 -11  -5   1   91.14    6.02
 -11  -5   1   75.85    4.39
 -11   5   1   77.98    5.13
  11   5  -1   92.86    6.42
  11  -5  -1   71.98    4.46
 -11  -5   0  330.85   18.35
 -11  -5   0  314.88   16.49
 -11   5   0  305.85   16.59
  11   5   0  321.70   18.13
  11  -5   0  324.78   17.09
  11  -5   1   56.13   10.98
 -11  -5  -1   77.38    5.45
 -11  -5  -1   79.67    4.53
 -11   5  -1   90.79    5.71
  11   5   1   87.19    5.52
  11  -5   1   81.95    4.69
  11  -5   2   26.52    5.66
 -11  -5  -2   31.62    4.11
 -11  -5  -2   24.49    2.81
 -11   5  -2   19.24    3.19
  11   5   2   18.85    5.25
  11  -5   2   24.15    2.89
  11  -5   3   26.11   12.41
 -11  -5  -3   46.42    6.07
 -11  -5  -3   29.38    3.93
 -11   5  -3   35.03    4.92
  11   5   3   37.88    8.07
  11  -5   3   38.17    5.49
  11  -5   4   90.63   12.16
 -11  -5  -4   89.05    9.44
 -11  -5  -4   95.04    9.06
 -11   5  -4   86.21    8.82
  11   5   4   76.93   19.62
  11  -5   4  100.67    9.95
  11  -7  -8    7.82    4.42
  11   7  -8   14.05    4.44
 -11  -7   8   27.28    6.83
  11  -7  -7   56.31    6.68
  11  -7  -7   52.75   12.77
  11   7  -7   47.32   11.73
 -11  -7   7   68.87    9.40
  11  -7  -6  190.46   15.75
  11  -7  -6  183.96   15.48
  11   7  -6  192.11   18.38
 -11  -7   6  180.60   16.79
  11  -7  -5  120.46    9.73
  11  -7  -5  131.39   10.87
  11   7  -5  132.52   10.19
 -11  -7   5   91.44    8.69
  11  -7  -4  516.23   20.60
 -11  -7   4  473.85   18.15
  11  -7  -4  409.35   16.55
  11   7  -4  550.27   20.69
 -11  -7   4  426.62   19.49
  11  -7  -3  143.52    8.80
 -11  -7   3  130.78    7.90
 -11   7   3  134.75    8.34
 -11  -7   3  117.93    6.48
 -11  -7   3  127.46    9.49
  11  -7  -2   69.90   12.81
 -11  -7   2   60.83    4.53
 -11  -7   2   62.07    3.69
 -11   7   2   80.23    5.44
  11   7  -2   76.62    6.31
  11  -7  -1   45.35    7.47
 -11  -7   1   53.88    4.59
 -11  -7   1   45.06    2.94
 -11   7   1   53.51    4.16
  11   7  -1   59.25   10.95
  11  -7  -1   46.59    3.04
  11  -7   0   18.52    4.55
 -11  -7   0   18.91    2.47
 -11  -7   0   22.87    1.88
 -11   7   0   28.55    2.84
  11   7   0   21.24    3.20
  11  -7   0   22.90    2.06
  11  -7   1  116.33   17.44
 -11  -7  -1   89.36    7.27
 -11  -7  -1  103.92    7.00
 -11   7  -1  107.62    8.30
  11   7   1  105.24   21.57
  11  -7   1  103.14    7.24
  11  -7   2   77.53   15.79
 -11  -7  -2   84.33    7.16
 -11  -7  -2   78.54    5.95
 -11   7  -2  101.84    8.17
  11   7   2   87.11   17.56
  11  -7   2   83.03    6.76
  11  -7   3   74.72    7.70
 -11   7  -3   73.82    7.50
  11  -7   3   51.22    6.10
  11  -7   4  105.49   10.94
 -11  -7  -4  100.83   11.41
 -11   7  -4  104.93   10.76
  11   7   4   88.32   21.46
  11  -7   4  106.29   10.90
  11  -9  -8   12.25    5.13
  11   9  -8   12.33    4.39
 -11  -9   8   19.84    6.51
  11  -9  -7   59.40    6.35
  11  -9  -7   67.23   19.73
  11   9  -7   51.93   12.98
 -11  -9   7   51.36    8.06
  11  -9  -6  170.10   12.36
  11  -9  -6  184.23   21.95
  11   9  -6  163.77   11.16
 -11  -9   6  153.81   12.97
  11  -9  -5  105.14    9.88
  11  -9  -5   92.93    7.02
  11   9  -5  111.06    9.18
 -11  -9   5  107.06   11.01
  11  -9  -4  490.24   35.62
 -11  -9   4  508.43   36.29
 -11  -9   4  406.40   31.25
  11  -9  -3  106.30    9.01
 -11  -9   3  112.61    9.02
 -11   9   3  111.91    9.16
 -11  -9   3  111.20   11.08
  11  -9  -2  603.02   43.47
 -11  -9   2  600.36   43.06
 -11   9   2  559.66   40.06
  11  -9  -1   93.16   13.66
 -11  -9   1   77.09    6.96
 -11   9   1   98.43    8.40
  11   9  -1   90.74   19.93
  11  -9   0   41.82   11.32
 -11  -9   0   41.93    5.15
 -11   9   0   53.35    4.86
  11   9   0   38.20    8.39
  11  -9   0   35.84    3.06
  11  -9   1   33.07    9.42
 -11  -9  -1   41.99    4.73
 -11   9  -1   43.72    4.41
  11   9   1   27.76    5.45
  11  -9   1   27.30    3.03
  11  -9   2  139.97   21.00
 -11  -9  -2  122.89   10.70
 -11   9  -2  114.41    9.78
  11   9   2  130.07   11.33
  11  -9   2  134.88   11.15
  11  -9   3   23.33   15.07
 -11  -9  -3   48.55    9.06
 -11   9  -3   38.10    7.13
  11   9   3   32.15   13.68
  11  -9   3   39.47    7.09
  11 -11  -7   20.04    5.61
  11 -11  -7   17.43    7.06
 -11 -11   7   17.89    6.67
  11 -11  -6  288.54   25.42
  11 -11  -6  250.01   21.70
 -11 -11   6  282.46   26.52
  11 -11  -5   85.02    8.23
 -11 -11   5   78.45    8.91
  11 -11  -4  109.27    8.87
 -11  11   4  106.84    8.21
 -11 -11   4   96.09    9.80
  11 -11  -3  339.36   27.50
 -11 -11   3  316.23   25.26
 -11  11   3  329.20   26.24
 -11 -11   3  380.94   32.70
  11 -11  -2  252.01   20.96
 -11 -11   2  235.70   19.29
 -11  11   2  224.04   18.17
 -11 -11   2  205.30   19.06
  11 -11  -1  230.31   19.54
 -11 -11   1  223.85   18.60
 -11  11   1  229.90   18.89
  11  11  -1  215.62   18.87
  11 -11   0  288.14   20.54
 -11 -11   0  281.23   19.48
 -11  11   0  279.95   18.87
  11  11   0  262.73   18.94
  11 -11   1   46.23   14.67
 -11 -11  -1   54.85    7.29
 -11  11  -1   63.04    7.54
  11  11   1   45.39    8.51
  11 -11   2   32.46    9.53
 -11 -11  -2   42.50    6.40
 -11  11  -2   29.35    5.14
  11  11   2   23.69    7.64
  11 -11   3   45.21   13.81
 -11 -11  -3   44.36    6.83
  11  11   3   22.37   12.47
  11 -13  -6   73.79    8.33
  11 -13  -6   71.40    7.48
 -11 -13   6   72.99   10.28
  11 -13  -5   73.53    8.18
 -11  13   5   53.96    5.48
 -11 -13   5   76.57   10.53
  11 -13  -4   53.83    7.56
 -11  13   4   56.66    6.62
 -11 -13   4   69.35    9.76
  11 -13  -3  124.99   11.12
 -11 -13   3  112.55    9.29
 -11  13   3  119.88    9.78
 -11 -13   3  142.49   14.36
  11 -13  -2  295.15   22.31
 -11 -13   2  329.61   24.49
 -11  13   2  306.95   22.45
 -11 -13   2  272.05   23.05
  11 -13  -1  124.87   11.79
 -11 -13   1  163.82   14.43
 -11  13   1  145.41   12.67
  11  13  -1  129.15   12.33
  11 -13   0  160.05   15.58
 -11 -13   0  156.32   14.66
 -11  13   0  153.39   14.02
  11  13   0  171.67   16.38
  11 -13   1   80.18   14.58
 -11 -13  -1   74.13   15.37
 -11  13  -1   65.75   11.09
  11  13   1   49.33   17.30
  11 -13   2  220.90   18.65
 -11 -13  -2  158.69   14.38
 -11  13  -2  207.80   17.53
  11  13   2  192.71   16.93
  11 -15  -5    9.14    3.69
 -11 -15   5    6.40    4.69
  11 -15  -4   12.90    4.15
 -11  15   4   18.22    4.60
 -11 -15   4   41.70   11.38
  11 -15  -3  110.92   11.48
 -11  15   3   79.38    7.73
 -11 -15   3  100.25   12.55
 -11 -15   2  122.45   11.69
 -11  15   2  120.21   11.12
 -11 -15   2   88.73   11.84
  11 -15  -1   29.95    7.24
 -11 -15   1   34.21    7.77
 -11  15   1   41.69    9.06
 -11 -15   1   30.08    9.13
  11 -15   0  229.71   20.90
 -11 -15   0  223.21   18.83
 -11  15   0  233.16   19.04
  11  15   0  327.56   27.28
  12   0  -9    3.81    3.04
  12   0  -8   96.45   17.82
  12   0  -7    3.68    1.18
  12   0  -6 1208.54   72.50
  12   0  -5    0.94    1.92
 -12   0   5    8.44    2.21
  12   0  -4 1038.44   52.71
  12   0  -4  952.52   47.95
  12   0  -3   -0.06    1.35
 -12   0   3    3.30    1.48
 -12   0   3    5.40    1.98
  12   0  -2   94.38    6.10
 -12   0   2   98.35    5.88
  12   0  -2   91.67    5.67
 -12   0   1    3.29    1.95
  12   0  -1    1.05    0.65
  12   0   0  369.36   15.83
 -12   0   0  373.53   14.98
  12   0   0  349.82   14.42
  12   0   1    7.01    2.59
 -12   0  -1    1.24    1.55
  12   0   1    3.09    1.84
 -12   0  -2  276.17   22.42
  12   0   2  269.46   21.95
 -12   0  -3    3.09    1.89
  12   0   3    4.05    2.64
 -12   0  -4   49.73   10.76
 -12   0  -4   38.11    8.38
  12   0   4   33.77    7.63
  12   2  -9    7.02    3.23
  12  -2  -9    2.63    2.63
  12   2  -8   34.92   13.26
  12   2  -7   -0.27    1.62
 -12  -2   7    2.23    1.75
  12  -2  -6   81.39    9.40
  12   2  -6   61.21   10.95
  12  -2  -6   61.89   14.55
 -12  -2   6   85.17    7.21
  12   2  -5  391.85   15.06
  12  -2  -5  423.09   16.96
  12  -2  -5  482.69   19.56
  12   2  -5  379.76   17.24
 -12  -2   5  356.46   15.51
  12   2  -4  498.64   25.64
  12  -2  -4  508.64   26.46
  12   2  -4  438.36   22.64
  12  -2  -4  491.29   25.49
 -12  -2   4  516.36   27.51
  12   2  -3  143.47    8.15
  12  -2  -3  147.63   18.63
 -12  -2   3  148.55    8.19
 -12   2   3  145.81    8.27
 -12   2   3  122.71    6.67
 -12  -2   3  141.00    8.84
  12   2  -2  107.92    6.77
  12  -2  -2  104.42    8.33
 -12   2   2   89.86    5.65
 -12  -2   2   85.39    5.00
  12   2  -2  100.10    6.38
  12  -2  -2   87.86    5.07
  12   2  -1   42.02    3.76
  12  -2  -1   47.27   10.83
 -12  -2   1   49.85    3.59
 -12   2   1   38.00    3.40
  12   2  -1   47.35    7.41
  12  -2  -1   29.41    6.77
  12  -2   0   85.62   17.23
 -12  -2   0   82.72    5.37
 -12  -2   0   93.45    4.95
 -12   2   0   79.74    5.03
  12   2   0   88.71    9.30
  12  -2   0   81.57   10.22
  12  -2   1   54.75    9.37
 -12  -2  -1   48.27    5.22
 -12  -2  -1   51.93    4.81
 -12   2  -1   56.63    5.46
  12   2   1   57.82    8.92
  12  -2   1   54.10    5.07
  12  -2   2  298.97   24.46
 -12  -2  -2  311.98   25.55
 -12  -2  -2  309.01   24.78
 -12   2  -2  276.51   22.48
  12   2   2  295.65   24.02
  12  -2   2  261.76   21.37
  12  -2   3    3.81    2.24
 -12  -2  -3    2.43    2.19
 -12  -2  -3    2.29    1.69
 -12   2  -3    1.69    2.26
  12   2   3    8.30    2.31
  12  -2   3    3.31    2.55
 -12  -2  -4   71.85    8.17
 -12   2  -4   79.67    8.86
 -12  -2  -4   67.20    7.49
 -12   2  -4   53.11    6.38
  12   2   4   73.64    8.30
  12  -2   4   58.84    6.84
  12  -4  -9   24.21    7.36
  12   4  -9   13.86    8.85
  12  -4  -8   84.18   18.08
 -12  -4   8   67.67    8.16
  12  -4  -7    4.81    2.75
  12   4  -7    3.74    1.37
 -12  -4   7    1.73    2.57
  12  -4  -6  109.39    7.48
  12  -4  -6  126.77    9.28
  12   4  -6  135.89    9.23
 -12  -4   6  136.61   11.60
  12  -4  -5   89.23   13.09
 -12  -4   5   74.73    5.88
  12  -4  -5   78.71   15.71
  12   4  -5   83.34    6.95
 -12  -4   5   85.24    8.64
  12  -4  -4  280.18   13.45
 -12  -4   4  306.40   12.36
  12   4  -4  283.84   11.39
  12  -4  -4  274.84   11.77
 -12  -4   4  306.49   14.27
  12  -4  -3  360.90   20.20
 -12  -4   3  351.52   18.71
 -12   4   3  358.17   19.15
 -12  -4   3  336.64   17.52
 -12  -4   3  381.89   21.46
  12  -4  -2  749.41   38.59
 -12  -4   2  674.49   34.80
 -12  -4   2  615.74   31.12
 -12   4   2  690.61   35.26
  12   4  -2  767.44   39.85
  12  -4  -2  636.88   31.82
  12  -4  -1   48.45    8.77
 -12  -4   1   42.65    4.06
 -12  -4   1   49.73    3.48
 -12   4   1   55.79    4.44
  12   4  -1   49.35   10.55
  12  -4  -1   43.90    8.01
  12  -4   0  662.91   28.87
 -12  -4   0  789.86   30.79
 -12  -4   0  752.56   28.21
 -12   4   0  673.31   25.84
  12   4   0  682.66   26.85
  12  -4   0  709.49   26.64
  12  -4   1  196.65   13.54
 -12  -4  -1  175.50   12.16
 -12  -4  -1  192.43   12.32
 -12   4  -1  200.60   13.30
  12   4   1  207.16   13.81
  12  -4   1  193.88   12.54
  12  -4   2   38.08    9.45
 -12  -4  -2   33.67    4.17
 -12  -4  -2   32.28    3.30
 -12   4  -2   33.64    4.29
  12   4   2   43.37   10.83
  12  -4   2   35.08    3.73
  12  -4   3   18.02    4.28
 -12  -4  -3   10.09    3.57
 -12  -4  -3    9.77    2.31
 -12   4  -3    4.61    1.96
  12   4   3   14.72    2.84
  12  -4   3    7.19    2.22
  12  -4   4  186.82   16.25
 -12  -4  -4  204.04   17.61
 -12  -4  -4  175.88   14.93
 -12   4  -4  191.97   16.34
  12   4   4  173.45   15.17
  12  -4   4  207.09   17.38
  12  -6  -8   37.01   15.58
  12   6  -8   46.35   13.27
 -12  -6   8   35.77    7.72
  12  -6  -7  102.57    8.42
  12  -6  -7  100.88   20.11
  12   6  -7  106.94   15.50
 -12  -6   7   96.02    9.94
  12  -6  -6  404.31   31.86
  12  -6  -6  479.50   37.93
  12   6  -6  407.16   31.97
 -12  -6   6  388.44   32.16
  12  -6  -5   63.62    5.10
  12   6  -5   68.09   12.34
 -12  -6   5   50.79    5.30
  12  -6  -4   86.83   13.71
 -12  -6   4   91.44    7.28
  12   6  -4   88.75    6.96
 -12   6   4   71.89    6.01
 -12  -6   4   95.19    9.14
  12  -6  -3  132.85   14.78
 -12  -6   3  126.30    6.29
 -12  -6   3  145.75    6.23
 -12   6   3  174.53    8.43
 -12  -6   3  143.65    8.91
  12  -6  -2  206.55    9.93
 -12  -6   2  196.60    9.10
 -12  -6   2  216.03    8.76
 -12   6   2  211.03    9.57
  12   6  -2  211.42   10.39
  12  -6  -1   87.64   16.72
 -12  -6   1   81.66    5.19
 -12  -6   1   94.28    4.73
 -12   6   1  111.04    6.54
  12   6  -1   78.35   16.27
  12  -6  -1   86.17    4.06
 -12  -6   0   34.09    4.56
 -12  -6   0   33.09    3.20
 -12   6   0   28.03    3.60
  12   6   0   33.75    6.40
  12  -6   0   20.58    2.35
  12  -6   1    3.52    1.73
 -12  -6  -1    5.09    2.13
 -12  -6  -1    5.68    1.46
 -12   6  -1    8.55    2.39
  12   6   1    4.02    1.84
  12  -6   1    4.36    1.45
  12  -6   2   64.82   13.52
 -12  -6  -2   87.75    8.05
 -12  -6  -2   68.43    7.62
 -12   6  -2   60.54    7.36
  12   6   2   82.17   20.93
  12  -6   2   64.43    7.36
  12  -6   3   10.94    7.33
 -12  -6  -3   29.02    5.77
 -12   6  -3   14.56    3.70
  12   6   3   26.07    6.67
  12  -6   3   25.55    5.14
  12  -8  -8   43.81   11.48
  12   8  -8   46.79   14.61
 -12  -8   8   50.22    7.74
  12  -8  -7   63.48    6.60
  12  -8  -7   55.14   16.54
  12   8  -7   35.17   10.67
 -12  -8   7   57.21    8.64
  12  -8  -6   99.44    8.69
  12  -8  -6   93.95   10.13
  12   8  -6   89.07    7.13
 -12  -8   6   89.74    9.21
  12  -8  -5  520.86   40.95
  12  -8  -5  542.30   42.44
  12   8  -5  588.31   45.52
 -12  -8   5  440.70   36.26
  12  -8  -4   74.90    6.31
 -12  -8   4   80.69    5.83
 -12  -8   4   58.35    3.92
 -12   8   4   69.00    5.18
 -12  -8   4   92.62    8.91
  12  -8  -3   65.92    9.64
 -12  -8   3   78.69    6.84
 -12   8   3   95.29    8.03
 -12  -8   3   63.25    7.29
  12  -8  -2  304.39   22.83
 -12  -8   2  292.03   21.83
 -12   8   2  274.97   20.35
  12   8  -2  324.73   24.59
  12  -8  -1    5.65    3.36
 -12  -8   1   13.73    2.77
 -12   8   1   15.55    2.65
 -12  -8   0  154.59   13.40
 -12   8   0  118.19   10.28
  12   8   0  151.03   26.91
  12  -8   1   42.99   10.58
 -12  -8  -1   46.56    5.70
 -12   8  -1   44.45    4.53
  12   8   1   38.73    8.06
  12  -8   1   44.84    4.22
  12  -8   2   91.07   24.72
 -12  -8  -2  107.42   10.63
 -12   8  -2  103.42    9.94
  12   8   2   89.01   21.39
  12  -8   2   98.99    9.31
  12  -8   3    6.68    2.77
 -12  -8  -3   29.11    7.23
  12   8   3   10.97    5.20
  12  -8   3    6.55    3.36
  12 -10  -7   48.48   10.52
  12 -10  -7   36.94   14.52
 -12 -10   7   31.47    9.45
  12 -10  -6  146.00   13.74
  12 -10  -6  125.42   11.63
 -12 -10   6  112.46   12.40
  12 -10  -5   11.00    3.29
 -12  10   5    9.33    2.38
 -12 -10   5   15.47    4.29
  12 -10  -4   37.66    4.83
 -12  10   4   48.75    4.78
 -12 -10   4   41.28    5.52
  12 -10  -3   17.93    2.94
 -12 -10   3   21.82    2.74
 -12 -10   3   21.88    4.76
  12 -10  -2   75.15   16.64
 -12 -10   2   72.39    6.01
 -12  10   2   85.00    6.62
 -12 -10   2   88.88    8.67
  12 -10  -1  102.30   16.01
 -12 -10   1  102.48    8.21
 -12  10   1  136.37   10.09
  12  10  -1  121.18   27.40
  12 -10   0  299.84   23.44
 -12 -10   0  355.58   26.32
 -12  10   0  337.96   24.67
  12  10   0  321.10   24.43
  12 -10   1   44.19   10.03
 -12 -10  -1   47.70    6.23
 -12  10  -1   49.53    6.11
  12  10   1   40.04   14.79
  12 -10   2   47.19   19.07
 -12 -10  -2   58.21   10.19
 -12  10  -2   64.33   11.06
  12  10   2   54.15   18.78
  12 -12  -6   82.25    8.92
  12 -12  -6   39.56    8.38
 -12 -12   6   72.66    9.64
  12 -12  -5   46.70    6.96
 -12  12   5   43.46    6.34
 -12 -12   5   55.90    8.66
  12 -12  -4   83.83    8.47
 -12  12   4   61.84    6.12
 -12 -12   4   67.66    8.88
  12 -12  -3  163.49   14.52
 -12 -12   3  156.67   13.45
 -12  12   3  159.12   13.63
 -12 -12   3  212.32   20.58
  12 -12  -2  198.31   17.47
 -12 -12   2  203.69   17.26
 -12  12   2  214.36   17.89
 -12 -12   2  205.25   19.40
  12 -12  -1   95.48   19.65
 -12 -12   1  114.57   10.65
 -12  12   1  103.41    9.49
  12  12  -1  106.51   10.89
  12 -12   0  103.72   13.46
 -12 -12   0  131.72   12.71
 -12  12   0  135.93   12.68
  12  12   0   94.08   28.55
  12 -12   1   38.98   10.98
 -12 -12  -1   50.66    7.33
 -12  12  -1   63.83    7.37
  12  12   1   55.78   15.71
  12 -14  -5  131.54   12.36
 -12  14   5  123.30   10.90
 -12 -14   5  129.54   13.64
  12 -14  -4   56.33    6.91
 -12  14   4   57.68    6.49
 -12 -14   4   46.72   11.47
  12 -14  -3   20.94    5.14
 -12  14   3   20.24    4.80
 -12 -14   3   32.80    8.41
  12 -14  -2   76.11   15.67
 -12 -14   2   71.94   11.95
 -12  14   2  119.48   11.15
 -12 -14   2  101.78   12.37
  12 -14  -1   27.95    9.17
 -12 -14   1   33.12    7.63
 -12  14   1   50.55    7.50
 -12 -14   1   45.17   11.04
  12 -14   0  166.90   17.26
 -12 -14   0  196.03   16.96
 -12  14   0  165.26   14.04
  12  14   0  196.85   17.57
  13   1  -8   30.84    6.20
  13  -1  -8   20.18    6.79
  13   1  -7   48.86   12.01
  13  -1  -7   40.70   14.23
  13  -1  -6  118.66    9.92
  13   1  -6  107.83   18.08
  13  -1  -6  139.63   12.23
  13   1  -5  516.73   37.51
  13  -1  -5  504.74   36.27
  13   1  -5  580.34   42.60
  13  -1  -5  593.93   42.77
 -13  -1   5  539.91   39.18
  13   1  -4   31.86    6.41
  13  -1  -4   41.80    6.62
 -13  -1   4   23.08    1.95
 -13   1   4   27.37    2.28
 -13  -1   4   28.69    3.15
  13   1  -3  297.94   12.77
  13  -1  -3  343.92   14.44
 -13   1   3  293.83   12.15
 -13  -1   3  292.82   11.99
 -13  -1   3  304.46   13.41
 -13   1   3  329.92   13.57
  13   1  -2  149.06   10.28
  13  -1  -2  182.40    9.00
 -13  -1   2  165.90    7.46
 -13   1   2  166.73    7.65
  13  -1  -2  173.66    7.84
  13   1  -2  162.81    7.69
  13   1  -1  250.58   11.70
  13  -1  -1  231.88   10.92
 -13  -1   1  226.36    9.79
 -13   1   1  215.01    9.57
  13   1  -1  213.40    9.64
  13  -1  -1  214.33    9.52
  13   1   0   78.18    6.45
  13  -1   0   52.92   14.99
 -13  -1   0   74.52    5.62
 -13   1   0   70.29    5.61
  13   1   0   76.49   10.57
  13  -1   0   77.82    6.08
  13  -1   1  242.36   20.29
 -13  -1  -1  214.33   17.88
 -13  -1  -1  256.24   20.76
 -13   1  -1  259.39   21.06
  13   1   1  250.35   20.53
  13  -1   1  254.45   20.67
  13  -1   2   21.81    4.17
 -13   1  -2   19.63    3.43
 -13  -1  -2   15.64    3.17
  13   1   2   16.90    4.79
  13  -1   2   19.21    3.11
 -13  -1  -3  280.07   24.25
 -13  -1  -3  241.20   20.56
 -13   1  -3  298.36   25.14
  13   1   3  311.97   26.36
  13  -1   3  322.72   27.10
  13  -3  -8   16.00    4.86
  13   3  -8   19.32    7.04
  13  -3  -7  307.26   23.04
  13   3  -7  352.12   25.53
  13  -3  -6   85.90   14.10
  13   3  -6  106.18    9.86
  13  -3  -6  111.31   10.41
 -13  -3   6   74.35    6.90
  13  -3  -5  229.19   14.48
 -13  -3   5  227.84   14.05
  13  -3  -5  204.16   13.06
  13   3  -5  296.78   18.40
 -13  -3   5  216.01   14.90
  13  -3  -4  117.06    9.38
 -13  -3   4   91.81    7.47
 -13  -3   4   85.14    6.61
 -13   3   4   82.84    6.77
 -13  -3   4  115.04    9.91
  13  -3  -3  141.54    7.45
 -13  -3   3  148.22    7.22
 -13   3   3  134.04    6.68
 -13  -3   3  135.34    6.24
 -13  -3   3  113.24    7.14
  13  -3  -2   67.35   12.53
 -13  -3   2   46.72    3.77
 -13  -3   2   53.79    3.26
 -13   3   2   42.96    3.17
  13   3  -2   36.89   11.33
  13  -3  -2   43.23    5.69
  13  -3  -1   18.14    5.63
 -13  -3   1   30.26    3.89
 -13  -3   1   19.63    2.33
 -13   3   1   23.24    2.97
  13   3  -1   12.71    3.79
  13  -3  -1   12.03    3.21
  13  -3   0  196.80   13.75
 -13  -3   0  196.82   13.57
 -13  -3   0  225.13   14.26
 -13   3   0  204.16   13.23
  13   3   0  208.99   14.49
  13  -3   0  188.38   12.06
  13  -3   1  123.83   13.14
 -13  -3  -1  127.70   10.06
 -13  -3  -1  122.75    9.05
 -13   3  -1  136.17   10.39
  13   3   1  127.94    9.78
  13  -3   1  129.55    9.45
  13  -3   2   11.69    4.06
 -13  -3  -2   11.17    3.22
 -13  -3  -2   13.63    2.92
 -13   3  -2   27.68    4.20
  13   3   2    7.21    4.36
  13  -3   2   14.03    2.71
  13  -3   3   11.84    3.76
 -13  -3  -3    7.62    3.31
 -13  -3  -3    5.03    2.27
 -13   3  -3    4.92    3.26
  13   3   3   15.60    4.50
  13  -3   3    8.21    3.61
  13  -5  -8   27.32    8.96
  13   5  -8   21.35    7.52
  13  -5  -7   89.49    8.76
  13   5  -7   56.31   13.58
 -13  -5   7   50.16    6.76
  13  -5  -6    3.82    1.93
  13  -5  -6    3.79    3.25
  13   5  -6    4.98    2.92
 -13  -5   6    0.83    2.40
  13  -5  -5   26.92    5.55
  13  -5  -5   19.46    2.72
  13   5  -5   22.94    6.36
 -13  -5   5   18.21    3.35
  13  -5  -4   68.85   15.63
 -13  -5   4   62.55    4.77
 -13  -5   4   54.75    3.91
 -13   5   4   68.34    5.14
 -13  -5   4   77.39    7.01
  13  -5  -3  312.14   23.20
 -13  -5   3  288.00   21.29
 -13  -5   3  279.42   20.14
 -13   5   3  292.05   21.49
 -13  -5   3  326.36   25.03
  13  -5  -2  518.44   38.00
 -13  -5   2  490.32   35.49
 -13  -5   2  515.63   36.61
 -13   5   2  452.26   32.60
  13   5  -2  532.19   38.87
  13  -5  -1  305.15   19.38
 -13  -5   1  307.13   19.47
 -13  -5   1  304.84   18.47
 -13   5   1  290.00   18.23
  13   5  -1  241.62   16.66
  13  -5   0  137.94   12.19
 -13  -5   0  154.24   13.39
 -13  -5   0  171.15   13.98
 -13   5   0  148.87   12.75
  13   5   0  173.55   29.53
  13  -5   0  155.80   12.79
  13  -5   1  100.47   17.95
 -13  -5  -1  127.44    9.98
 -13  -5  -1  118.97    8.63
 -13   5  -1  112.95    8.69
  13   5   1  111.56   23.22
  13  -5   1  114.71    8.50
  13  -5   2   22.95    4.61
 -13  -5  -2   34.52    5.87
 -13  -5  -2   21.34    3.48
 -13   5  -2   28.72    4.83
  13   5   2   29.86    7.15
  13  -5   2   24.32    4.10
  13  -5   3   70.22   15.29
 -13  -5  -3  119.78   12.28
 -13   5  -3   89.10    9.49
  13   5   3   81.30   20.13
  13  -5   3   89.10    9.16
  13  -7  -8   28.13   12.12
  13   7  -8   22.46    5.56
  13  -7  -7   22.31    3.90
  13  -7  -7   28.17    7.19
  13   7  -7   14.77    5.76
  13  -7  -6   60.50    6.97
  13  -7  -6   85.89    7.97
  13   7  -6   44.24   13.32
 -13  -7   6   60.87    8.27
  13  -7  -5    3.61    2.19
  13   7  -5    4.04    1.32
 -13  -7   5    4.61    2.80
  13  -7  -4  470.69   37.11
 -13  -7   4  464.19   36.32
 -13   7   4  473.69   37.28
 -13  -7   4  441.69   34.20
 -13  -7   4  399.87   32.99
  13  -7  -3   34.82    5.96
 -13  -7   3   41.29    3.92
 -13  -7   3   29.85    2.48
 -13   7   3   45.36    4.47
 -13  -7   3   35.89    5.47
  13  -7  -2   45.12    9.46
 -13  -7   2   30.61    3.38
 -13   7   2   23.14    2.94
  13   7  -2   52.83    5.84
  13  -7  -1  129.10   25.20
 -13  -7   1  115.47   10.32
 -13   7   1  118.77   10.41
  13   7  -1   93.05   22.83
 -13  -7   0  102.05    8.64
 -13   7   0   98.82    8.01
  13   7   0   92.29   17.44
  13  -7   1  110.81   10.46
 -13  -7  -1  101.26    9.96
 -13   7  -1  102.91    9.65
  13   7   1   80.34   18.25
  13  -7   2   54.52   16.96
 -13  -7  -2   59.70   10.56
 -13   7  -2   72.32   12.11
  13   7   2   40.93   15.23
  13  -9  -7  113.86   11.40
  13  -9  -7  132.13   14.13
 -13  -9   7  118.53   13.95
  13  -9  -6    5.02    3.15
  13  -9  -6    2.94    1.64
 -13  -9   6   10.84    4.21
  13  -9  -5   51.37    5.94
 -13   9   5   47.64    5.57
 -13  -9   5   62.93    7.72
  13  -9  -4   30.48    4.82
 -13   9   4   35.74    4.76
 -13  -9   4   34.25    6.60
  13  -9  -3  106.04   19.01
 -13  -9   3   98.30    7.63
 -13   9   3   71.44    5.98
 -13  -9   3   93.32    9.89
  13  -9  -2  137.78   23.80
 -13  -9   2  116.18    9.17
 -13   9   2  114.86    8.85
  13   9  -2  129.31   10.76
  13  -9  -1  125.20   10.96
 -13  -9   1  130.12   10.80
 -13   9   1  121.53    9.94
  13   9  -1  135.38   14.94
  13  -9   0   31.23   11.58
 -13  -9   0   29.21    4.46
 -13   9   0   45.42    5.63
  13   9   0   40.11   14.43
  13  -9   1   42.28   14.77
 -13  -9  -1   71.83    8.02
 -13   9  -1   58.04    6.56
  13   9   1   51.11   12.05
  13  -9   2   54.82   13.96
 -13  -9  -2   61.08    7.06
 -13   9  -2   56.84    6.64
  13   9   2   65.86   15.79
  13 -11  -6  193.38   18.30
 -13  11   6  128.73   11.99
 -13 -11   6  152.00   16.68
  13 -11  -5   36.85    6.92
 -13  11   5   31.88    5.92
 -13 -11   5   19.66    5.29
  13 -11  -4   24.74    4.65
 -13  11   4   20.82    3.76
 -13 -11   4   17.18    4.85
  13 -11  -3  166.19   14.72
 -13 -11   3  130.58   11.43
 -13  11   3  139.74   12.20
 -13 -11   3  154.64   15.70
  13 -11  -2   29.28    9.26
 -13 -11   2   32.84    4.40
 -13 -11   2   54.91    7.87
  13 -11  -1   76.02   21.84
 -13 -11   1   52.18    6.17
  13  11  -1   56.17   18.42
  13 -11   0  116.66   12.88
 -13 -11   0  107.72   10.66
 -13  11   0  129.69   11.92
  13  11   0   96.01    9.88
  13 -11   1   70.46   13.06
 -13 -11  -1   65.92    7.26
 -13  11  -1   83.02    8.43
  13  11   1   67.67   20.19
  13 -13  -5   83.54    8.41
 -13  13   5   69.78    7.05
 -13 -13   5   68.38   10.04
  13 -13  -4  135.68   13.50
 -13  13   4  139.27   13.24
 -13 -13   4   93.21   11.57
  13 -13  -3  115.25   11.79
 -13  13   3  119.30   11.75
 -13 -13   3  110.95   13.88
  13 -13  -2  132.82   24.92
 -13 -13   2  158.16   15.06
 -13  13   2  200.25   18.54
 -13 -13   2  140.84   15.44
  13 -13  -1    4.98    2.45
 -13 -13   1    7.69    2.88
 -13  13   1    4.45    2.68
  13  13  -1   10.16    4.87
  14   0  -8   65.24   18.60
  14   0  -7    1.69    1.46
  14   0  -6   31.67    8.43
  14   0  -5    0.24    0.96
  14   0  -5    5.00    1.89
  14   0  -4  932.19   54.79
 -14   0   4  963.14   57.19
  14   0  -3    0.95    1.65
 -14   0   3    2.33    1.35
 -14   0   3    4.36    2.13
  14   0  -2  188.99   12.66
 -14   0   2  144.05    9.54
  14   0  -2  184.60   11.83
  14   0  -1    1.52    1.15
 -14   0   1    3.26    1.36
  14   0  -1    2.93    1.47
  14   0   0  234.51   16.71
 -14   0   0  232.68   15.86
  14   0   0  197.23   14.63
  14   0   1    0.47    2.10
 -14   0  -1    6.46    2.22
  14   0   1    2.13    2.03
 -14   0  -2  278.61   23.86
 -14   0  -2  283.97   23.92
  14   0   2  309.33   26.17
  14   2  -8   33.76   14.39
  14  -2  -8   28.14   13.59
  14   2  -7   25.25   10.80
  14  -2  -7   27.44   10.88
  14  -2  -6   19.51    4.22
  14   2  -6   32.19    9.90
  14  -2  -6   28.62    9.05
  14  -2  -5   17.50    5.55
 -14  -2   5   24.98    2.42
  14  -2  -5   25.54    3.12
  14   2  -4  178.01   11.67
  14  -2  -4  156.10   11.71
 -14  -2   4  166.39   10.73
 -14   2   4  176.54   11.62
 -14  -2   4  137.98   10.03
  14   2  -3   80.35    6.26
  14  -2  -3   93.67   14.39
 -14  -2   3   93.09    6.41
 -14   2   3   87.44    6.41
 -14  -2   3   88.01    7.21
  14   2  -2  251.36   16.12
  14  -2  -2  248.04   16.09
 -14  -2   2  248.59   15.49
 -14   2   2  227.91   14.55
  14   2  -2  247.76   15.75
  14  -2  -1   18.68    8.19
 -14  -2   1   33.08    3.84
 -14  -2   1   27.94    3.05
 -14   2   1   28.03    3.04
  14   2  -1   32.13    6.77
  14  -2  -1   25.32    6.26
  14  -2   0   89.82   19.63
 -14  -2   0   86.57    7.55
 -14  -2   0   94.40    7.19
 -14   2   0  106.79    8.05
  14   2   0  102.47    8.22
  14  -2   0  108.47    8.09
  14  -2   1   66.02   12.51
 -14  -2  -1   69.24    7.66
 -14  -2  -1   54.90    6.09
 -14   2  -1   58.69    8.07
  14   2   1   39.70   11.72
  14  -2   1   56.01   13.78
  14  -2   2  221.79   19.52
 -14  -2  -2  287.88   24.74
 -14  -2  -2  206.35   17.89
 -14   2  -2  253.77   21.70
  14   2   2  205.17   18.11
  14  -4  -8  117.83   10.86
  14   4  -8  120.48   10.54
  14  -4  -7   70.50   18.75
  14   4  -7   99.89    9.51
  14  -4  -6  137.49   11.51
  14   4  -6  188.12   14.31
  14  -4  -6  171.35   13.79
  14  -4  -5  107.51   15.98
  14   4  -5  107.79    7.88
 -14   4   5   87.07    6.53
 -14  -4   5   89.42    7.83
 -14  -4   4   34.72    3.63
 -14   4   4   39.01    4.05
 -14  -4   4   31.82    2.88
 -14  -4   4   20.20    3.20
  14  -4  -3   28.46    7.15
 -14  -4   3   38.43    3.71
 -14  -4   3   39.56    3.31
 -14   4   3   33.17    3.50
 -14  -4   3   31.00    4.04
  14  -4  -2    5.00    3.02
 -14  -4   2   10.90    2.22
 -14  -4   2   13.01    1.86
 -14   4   2   13.78    2.37
  14   4  -2    7.94    1.89
  14  -4  -1    5.02    1.85
 -14  -4   1    8.72    2.43
 -14  -4   1    1.24    1.20
 -14   4   1    5.83    1.70
  14   4  -1    0.58    2.52
  14  -4   0  119.90   18.31
 -14  -4   0  113.68    9.72
 -14  -4   0  113.05    8.94
 -14   4   0  104.21    8.54
  14   4   0   98.83    8.65
  14  -4   1   19.56    8.94
 -14  -4  -1   14.70    3.30
 -14  -4  -1   27.27    4.04
 -14   4  -1   27.85    4.12
  14   4   1   23.75    7.76
  14  -4   1   30.31    3.95
  14  -4   2  122.36   12.56
 -14  -4  -2  120.70   12.41
 -14  -4  -2  105.51   10.25
 -14   4  -2  101.79   10.46
  14   4   2   97.47   19.12
  14  -4   2   96.72    9.67
  14  -6  -7   76.28   25.70
  14   6  -7   91.97    8.84
  14  -6  -6  203.64   19.78
  14  -6  -6  212.01   17.72
  14   6  -6  258.81   21.13
 -14  -6   6  197.02   17.95
  14  -6  -5  118.63   19.53
 -14   6   5   94.66    7.61
 -14  -6   5  114.58   10.37
  14  -6  -4  189.75   16.34
 -14  -6   4  210.45   14.32
 -14  -6   4  203.05   13.34
 -14   6   4  230.40   15.77
 -14  -6   4  162.94   13.06
  14  -6  -3   31.99    6.52
 -14  -6   3   30.74    3.53
 -14  -6   3   40.01    3.24
 -14   6   3   42.15    4.11
 -14  -6   3   47.54    5.97
  14  -6  -2  111.82    9.00
 -14  -6   2  117.28    9.12
 -14  -6   2  108.95    7.51
 -14   6   2  109.57    8.30
  14   6  -2  127.56   10.99
  14  -6  -1    3.84    1.42
 -14  -6   1    4.36    2.35
 -14   6   1    8.17    2.20
  14   6  -1    3.44    2.84
  14  -6   0   36.50    8.78
 -14  -6   0   29.85    4.56
 -14   6   0   40.05    4.97
  14   6   0   23.51    5.92
  14  -6   1   48.88   18.97
 -14   6  -1   43.36    6.33
  14   6   1   62.89   12.24
  14  -6   2   21.96   11.02
 -14  -6  -2   25.10    4.55
 -14   6  -2   28.28    4.87
  14   6   2   16.37    9.06
  14  -8  -7   44.25    6.24
 -14  -8   7   48.19    7.76
  14  -8  -6   75.05   15.25
 -14  -8   6   72.38   13.41
  14  -8  -5   20.86    4.93
 -14   8   5   14.50    2.84
 -14  -8   5   18.97    4.35
  14  -8  -4   15.23    4.73
 -14   8   4   16.45    2.76
 -14  -8   4   15.46    4.56
  14  -8  -3   41.19   12.80
 -14  -8   3   45.19    5.61
 -14   8   3   38.34    4.91
 -14  -8   3   46.78    7.57
  14  -8  -2  124.41   11.41
 -14  -8   2  121.01   10.20
 -14   8   2  102.79    8.53
  14   8  -2  122.14   11.18
  14  -8  -1   55.87   12.73
 -14  -8   1   76.08    7.58
 -14   8   1   73.93    7.35
  14   8  -1   65.10   20.76
 -14  -8   0  103.93   10.38
 -14   8   0  120.04   11.49
  14   8   0  100.97   22.03
  14  -8   1   39.07   14.74
 -14  -8  -1   65.32    7.65
 -14   8  -1   64.65    7.32
  14   8   1   27.11    8.96
  14 -10  -6   42.86    6.25
 -14  10   6   39.08    5.52
 -14 -10   6   29.10    6.36
  14 -10  -5   99.87    9.95
 -14  10   5  108.10   10.47
 -14 -10   5   86.79   10.36
  14 -10  -4    6.43    2.50
 -14  10   4    6.98    2.44
 -14 -10   4    8.48    3.80
  14 -10  -3   76.07   19.13
 -14 -10   3   82.11    8.15
 -14  10   3   76.01    7.58
 -14 -10   3   69.73    9.04
  14 -10  -2  151.32   20.28
 -14 -10   2  175.09   15.99
 -14  10   2  138.41   12.95
 -14 -10   2  131.42   14.15
  14 -10  -1  304.07   25.89
 -14 -10   1  259.18   22.20
 -14  10   1  243.46   20.69
  14  10  -1  292.35   25.20
  14 -10   0  253.28   24.69
 -14 -10   0  346.25   31.25
 -14  10   0  291.57   26.24
  14  10   0  296.81   27.22
  14 -12  -4   15.52    4.15
 -14  12   4   22.56    4.11
 -14 -12   4    5.44    3.85
  14 -12  -3   23.62    7.97
 -14  12   3   18.26    4.58
 -14 -12   3   29.99    9.35
  14 -12  -2   74.03   18.85
 -14 -12   2   93.32    9.25
 -14  12   2   99.71    9.30
 -14 -12   2   89.39   10.21
  14 -12  -1  131.48   12.22
 -14 -12   1  130.06   11.88
  14  12  -1  125.65   12.23
  15  -1  -8   38.60   17.04
  15   1  -7   74.45   24.35
  15  -1  -7  109.90   10.37
  15   1  -6    7.46    1.93
  15  -1  -6    8.80    2.49
  15   1  -5  295.61   21.41
  15  -1  -5  331.12   23.91
 -15  -1   5  264.65   19.03
 -15   1   5  222.08   16.22
  15   1  -4   56.49    5.00
  15  -1  -4   56.11   13.20
 -15  -1   4   59.32    4.85
 -15   1   4   63.61    5.37
  15   1  -3  220.81   15.31
  15  -1  -3  211.26   14.75
 -15   1   3  205.75   13.93
 -15  -1   3  196.67   13.25
  15   1  -2    6.15    2.40
  15  -1  -2    8.40    3.04
 -15   1   2   18.72    3.19
 -15  -1   2   13.53    2.26
  15   1  -2    6.71    2.97
  15   1  -1  119.22   10.14
  15  -1  -1  111.07   20.70
 -15  -1   1  100.85    8.32
 -15   1   1  101.33    8.24
  15   1  -1  107.80    8.90
 -15  -1   0   60.87    6.61
 -15  -1   0   72.18    7.29
 -15   1   0   59.30    5.94
  15   1   0   40.23   13.13
  15  -1   0   60.94    6.06
  15  -1   1  272.04   23.33
 -15  -1  -1  263.19   22.61
 -15   1  -1  323.33   27.04
 -15  -1  -1  266.10   22.42
  15  -1   1  245.52   21.09
 -15  -1  -2  129.15   12.14
 -15   1  -2  142.66   13.02
 -15  -1  -2  111.18   10.09
 -15   1  -2  127.69   11.45
  15   1   2  112.95   11.98
  15  -1   2  107.08   15.35
  15   3  -7    3.78    1.62
  15  -3  -7    5.17    2.85
  15   3  -6   33.04    4.84
  15  -3  -6   22.42    3.97
  15  -3  -5   65.57    7.73
 -15  -3   5   56.62    6.31
 -15   3   5   54.23    6.08
  15  -3  -4   48.21   11.78
 -15  -3   4   44.53    5.30
 -15   3   4   47.68    5.66
 -15  -3   4   47.23    5.40
  15  -3  -3  116.56   15.53
 -15  -3   3   87.67    7.27
 -15  -3   3   91.37    6.72
 -15   3   3   92.36    7.10
 -15  -3   3   95.21    8.39
  15  -3  -2   66.68   16.49
 -15  -3   2   73.12    6.68
 -15  -3   2   78.62    6.48
 -15   3   2   65.77    7.46
  15   3  -2   64.53    7.37
  15  -3  -1  105.61   10.33
 -15  -3   1  130.44   11.34
 -15  -3   1  136.84   10.73
 -15   3   1   90.79    7.73
  15   3  -1   90.40   10.63
  15  -3   0    8.42    3.58
 -15  -3   0    5.88    2.18
 -15  -3   0    6.48    2.07
 -15   3   0    9.53    2.47
  15   3   0    7.02    3.65
  15  -3   1   57.49   18.22
 -15  -3  -1  133.70   13.32
 -15  -3  -1  112.73   10.89
 -15   3  -1   97.16    9.83
  15   3   1   65.48   21.66
  15   5  -7   24.69   10.14
  15  -5  -7   25.17    6.35
  15  -5  -6   30.46   11.77
  15   5  -6   38.95    5.47
  15  -5  -6   28.82    4.48
  15  -5  -5  142.96   12.48
 -15  -5   5  106.70    8.95
 -15   5   5  111.46    9.73
 -15  -5   5  111.21   10.86
  15  -5  -4   22.36    8.59
 -15  -5   4   32.63    4.09
 -15   5   4   26.60    3.70
 -15  -5   4   32.34    3.95
 -15  -5   4   25.56    4.49
  15  -5  -3   37.83   10.63
 -15  -5   3   43.72    5.40
 -15  -5   3   32.34    3.73
 -15  -5   3   46.26    6.42
  15  -5  -2   -0.27    1.83
 -15  -5   2   -0.24    1.69
 -15  -5   2    4.67    1.58
 -15   5   2    3.20    1.91
  15   5  -2   -0.51    1.82
  15  -5  -1  273.41   22.96
 -15  -5   1  210.28   17.99
 -15   5   1  213.03   17.82
  15   5  -1  222.29   18.88
  15  -5   0    8.83    4.94
 -15  -5   0   12.06    3.36
 -15   5   0   10.20    3.20
  15   5   0   10.55    4.02
  15  -5   1    7.93    4.91
 -15  -5  -1    7.20    2.89
 -15   5  -1   14.45    4.17
  15   5   1    3.08    2.48
  15  -7  -6   32.98   10.58
 -15   7   6   34.56    7.28
 -15  -7   6   35.57    8.59
  15  -7  -5  131.04   20.21
 -15   7   5  131.63   12.30
 -15  -7   5   96.25   10.64
  15  -7  -4  138.61   13.85
 -15   7   4  122.43   11.38
 -15  -7   4  144.78   14.93
  15  -7  -3  111.60   10.45
 -15  -7   3  128.59   11.62
 -15   7   3  114.22   10.12
 -15  -7   3  130.80   12.97
  15  -7  -2   62.75   12.21
 -15  -7   2   82.09    8.66
 -15   7   2   84.09    8.40
  15   7  -2   75.87    8.10
  15  -7  -1    5.21    2.57
 -15  -7   1    5.60    2.66
 -15   7   1    7.14    2.34
  15   7  -1    3.53    2.62
  15  -7   0   29.90   11.56
 -15  -7   0   49.35   10.73
 -15   7   0   40.89    8.71
  15   7   0   34.40   14.15
  15  -9  -6   79.95    8.24
 -15   9   6   70.38    6.71
 -15  -9   6   93.05   11.39
  15  -9  -5    9.00    4.47
 -15   9   5   25.38    5.86
 -15  -9   5   21.25    6.35
  15  -9  -4   15.27    4.24
 -15   9   4   21.84    4.56
 -15  -9   4   11.32    3.79
  15  -9  -3  134.15   13.17
 -15  -9   3   90.04    8.58
 -15   9   3  126.11   11.54
 -15  -9   3  127.47   13.23
  15  -9  -2   11.65    3.46
 -15   9   2    4.45    2.80
  15  -9  -1   89.37   17.80
 -15  -9   1   99.78   10.55
 -15   9   1   98.18    9.85
  15   9  -1  100.78   11.78
 -15  11   3   34.65    5.36
  16   0  -7    2.22    2.14
 -16   0   6  129.74   11.20
  16   0  -5    6.48    2.24
 -16   0   5    8.35    2.32
  16   0  -4  462.66   54.50
 -16   0   4  425.57   34.02
  16   0  -3    2.93    2.15
 -16   0   3    2.87    1.79
  16   0  -2  164.45   14.43
 -16   0   2  193.59   16.12
  16   0  -1    6.15    2.44
 -16   0   1    3.90    1.54
 -16   0   0  144.41   13.69
  16   2  -7   14.30    3.34
 -16  -2   6  130.88   11.16
 -16   2   6  117.68   10.32
  16  -2  -5   51.46   10.52
 -16   2   5   48.14    6.63
 -16  -2   5   41.40    5.89
  16  -2  -4  185.64   15.87
 -16  -2   4  166.32   14.20
 -16   2   4  184.72   15.44
 -16  -2   4  175.13   14.60
  16  -2  -3   88.12    8.41
 -16  -2   3   92.65    8.70
 -16   2   3   83.33    7.77
 -16  -2   3   79.97    7.17
  16  -2  -2  144.66   25.57
 -16  -2   2  159.34   14.60
 -16  -2   2  148.66   13.13
 -16   2   2  154.54   14.08
  16  -2  -1   67.53   13.16
 -16  -2   1   55.78    9.59
 -16  -2   1   63.31   10.39
 -16   2   1   72.60   11.99
  16   2  -1   57.85   18.71
  16  -2   0  142.87   14.24
 -16  -2   0  122.47   12.35
 -16  -2   0  107.48   10.44
 -16   2   0  124.92   12.12
  16   2   0  114.78   14.49
 -16  -4   6   69.53    6.71
 -16   4   6   77.58    7.66
  16  -4  -5   69.54   19.91
 -16   4   5  109.61   10.05
 -16  -4   5  109.98    9.86
  16  -4  -4  340.63   52.61
 -16  -4   4  280.45   24.16
 -16  -4   4  266.21   22.64
 -16   4   4  278.72   23.99
  16  -4  -3   29.33    6.76
 -16  -4   3   21.83    3.72
 -16  -4   3   26.75    3.87
 -16   4   3   35.74    5.51
  16  -4  -2  171.53   16.17
 -16  -4   2  171.45   15.78
 -16  -4   2  152.72   13.44
 -16   4   2  160.77   14.62
  16   4  -2  160.14   14.96
  16  -4  -1    6.23    2.50
 -16  -4   1    4.76    2.39
 -16   4   1    5.80    2.47
  16   4  -1    3.53    2.10
  16  -4   0   14.01    6.96
 -16  -4   0   18.07    3.69
 -16   4   0   31.68    5.54
  16   4   0   12.57    6.01
 -16   6   6   10.97    2.41
  16  -6  -5    2.21    2.52
 -16   6   5   12.86    3.75
 -16   6   4   34.63    6.36
 -16  -6   4   22.51    5.32
  16  -6  -3    5.59    2.07
 -16  -6   3    7.84    2.59
 -16   6   3    8.99    2.61
 -16  -6   3    5.32    3.04
  16  -6  -2   32.16    9.57
 -16  -6   2   45.45    7.95
 -16   6   2   46.15    8.07
  16   6  -2   50.08    9.23
  16  -6  -1   34.10    9.59
 -16  -6   1   46.15   10.02
 -16   6   1   43.21    9.16
  16   6  -1   29.79   13.79
  16  -8  -5   30.73   10.20
 -16   8   5   59.38    6.09
 -16  -8   5   51.83    7.20
  16  -8  -4   20.91    8.20
 -16   8   4   30.63    4.73
 -16  -8   4   22.49    5.33
  16  -8  -3   43.18   16.85
 -16  -8   3   54.15    6.88
 -16   8   3   70.27    7.52
 -16  -8   3   65.09    8.62
  16  -8  -2   83.27   16.06
 -16  -8   2  129.04   11.71
 -16   8   2   95.19    8.81
  16   8  -2   89.26    9.38
 -17  -1   6   15.04    2.78
 -17   1   6   14.02    2.66
 -17   1   5  185.33   16.86
 -17  -1   5  194.71   17.60
  17   1  -4   28.73    6.49
  17  -1  -4   30.18   11.57
 -17   1   4   38.44    8.17
 -17  -1   4   37.36    7.78
  17  -1  -3   82.63   14.74
 -17  -1   3   99.91    9.66
 -17   1   3   80.96    8.08
  17  -1  -2   23.70    5.69
 -17  -1   2   20.66    4.97
 -17   1   2   35.05    7.72
 -17  -1   2   33.25    7.23
  17  -1  -1  270.56   22.58
 -17  -1   1  231.02   19.31
 -17  -1   1  231.04   18.69
 -17   1   1  212.49   17.29
  17  -3  -5   61.59    8.97
 -17   3   5   73.05    6.95
 -17  -3   5   70.46    6.39
  17  -3  -4   29.59   12.14
 -17  -3   4   39.39    8.38
 -17   3   4   43.44    9.08
 -17  -3   4   29.98    6.33
  17  -3  -3   85.83   12.22
 -17  -3   3   99.04    9.95
 -17  -3   3   99.90    9.58
 -17   3   3   92.70    9.15
  17  -3  -2   17.29    8.04
 -17  -3   2   34.52    7.83
 -17  -3   2   22.57    5.19
 -17   3   2   22.94    5.48
  17  -3  -1  115.26   13.23
 -17  -3   1  120.75   11.15
 -17   3   1  120.09   10.46
  17  -5  -5   26.14   13.64
 -17   5   5   36.45    5.21
  17  -5  -4   85.20   16.78
 -17   5   4  122.80   10.61
  17  -5  -3   86.40   21.73
 -17  -5   3   85.04    8.06
 -17   5   3   89.90    8.10
  17  -5  -2   39.80   10.50
 -17  -5   2   57.88    6.35
 -17   5   2   50.57    5.41
   0   0   0    0.00    0.00

_computing_structure_solution     'SHELXT 2014/5 (Sheldrick, 2014)'
;
_shelx_hkl_checksum               40069
_audit_update_record
;
????
;
_olex2_submission_special_instructions 'No special instructions were received'
